# Supplementary material for: Multilevel determinants of racial/ethnic disparities in severe maternal morbidity and mortality in the context of the COVID-19 pandemic in the USA: protocol for a concurrent triangulation, mixed-methods study
Source: PubMed Central journal article supplement — BMJ Open. 2022 Jun 10;12(6):e062294. doi: 10.1136/bmjopen-2022-062294 (PMC9189547; doi:10.1136/bmjopen-2022-062294), 2022-06-10
Supplement: bmjopen-2022-062294.draft_revisions.pdf [file bmjopen-2022-062294.draft_revisions.pdf]

# BMJ Open

BMJ Open is committed to open peer review. As part of this commitment we make the peer review history of every article we publish publicly available.

When an article is published we post the peer reviewers' comments and the authors' responses online. We also post the versions of the paper that were used during peer review. These are the versions that the peer review comments apply to.

The versions of the paper that follow are the versions that were submitted during the peer review process. They are not the versions of record or the final published versions. They should not be cited or distributed as the published version of this manuscript.

BMJ Open is an open access journal and the full, final, typeset and author-corrected version of record of the manuscript is available on our site with no access controls, subscription charges or pay-per-view fees (<http://bmjopen.bmj.com>).

If you have any questions on BMJ Open's open peer review process please email [info.bmjopen@bmj.com](mailto:info.bmjopen@bmj.com)

# BMJ Open

## Multilevel Determinants of Racial/Ethnic Disparities in Maternal Morbidity and Mortality in the Context of the COVID-19 Pandemic: A Research Protocol

|                               |                                                                                                                                                                                                                                                                                                                                                                                                                                                                                                                                                                                                                                                                                                                                                                                                                                                                                                                                                                                               |
|-------------------------------|-----------------------------------------------------------------------------------------------------------------------------------------------------------------------------------------------------------------------------------------------------------------------------------------------------------------------------------------------------------------------------------------------------------------------------------------------------------------------------------------------------------------------------------------------------------------------------------------------------------------------------------------------------------------------------------------------------------------------------------------------------------------------------------------------------------------------------------------------------------------------------------------------------------------------------------------------------------------------------------------------|
| Journal:                      | <i>BMJ Open</i>                                                                                                                                                                                                                                                                                                                                                                                                                                                                                                                                                                                                                                                                                                                                                                                                                                                                                                                                                                               |
| Manuscript ID                 | bmjopen-2022-062294                                                                                                                                                                                                                                                                                                                                                                                                                                                                                                                                                                                                                                                                                                                                                                                                                                                                                                                                                                           |
| Article Type:                 | Protocol                                                                                                                                                                                                                                                                                                                                                                                                                                                                                                                                                                                                                                                                                                                                                                                                                                                                                                                                                                                      |
| Date Submitted by the Author: | 24-Feb-2022                                                                                                                                                                                                                                                                                                                                                                                                                                                                                                                                                                                                                                                                                                                                                                                                                                                                                                                                                                                   |
| Complete List of Authors:     | Liu, Jihong; University of South Carolina, Department of Epidemiology & Biostatistics<br>Hung, Peiyin ; University of South Carolina, Health Services Policy and Management<br>Liang, Chen; University of South Carolina, Department of Health Services Policy & Management<br>Zhang, Jiajia; University of South Carolina, Department of Epidemiology and Biostatistics, Arnold School of Public Health<br>Qiao, Shan; University of South Carolina,<br>Campbell, Berry; University of South Carolina, Department of Obstetrics and Gynecology; University of South Carolina, Department of Health Services Policy & Management<br>Olatosi, Bankole; University of South Carolina Arnold School of Public Health, Health Services, Policy and Management<br>Torres, Myriam; University of South Carolina System<br>Hikmet, Neset; University of South Carolina, Department of Integrated Information Technology<br>Li, Xiaoming; University of South Carolina Arnold School of Public Health |
| Keywords:                     | COVID-19, Health informatics < BIOTECHNOLOGY & BIOINFORMATICS, EPIDEMIOLOGY, Maternal medicine < OBSTETRICS, PERINATOLOGY, PUBLIC HEALTH                                                                                                                                                                                                                                                                                                                                                                                                                                                                                                                                                                                                                                                                                                                                                                                                                                                      |
|                               |                                                                                                                                                                                                                                                                                                                                                                                                                                                                                                                                                                                                                                                                                                                                                                                                                                                                                                                                                                                               |

SCHOLARONE™  
Manuscripts

1  
2  
3 **Multilevel Determinants of Racial/Ethnic Disparities in Maternal Morbidity and**  
4 **Mortality in the Context of the COVID-19 Pandemic: A Research Protocol**  
5  
6  
7

8 **Authors:**  
9

10 Jihong Liu, ScD, Department of Epidemiology & Biostatistics, Arnold School of Public Health,  
11 University of South Carolina. 915 Greene Street, Columbia, SC 29208, USA.  
12  
13

14  
15 Peiyin Hung, PhD, Department of Health Services Policy & Management, Arnold School of  
16 Public Health, University of South Carolina. 915 Greene Street, Columbia, SC 29208, USA.  
17  
18

19  
20 Chen Liang, PhD, Department of Health Services Policy & Management, Arnold School of Public  
21 Health, University of South Carolina. 915 Greene Street, Columbia, SC 29208, USA.  
22  
23

24  
25 Jiajia Zhang, PhD, Department of Epidemiology & Biostatistics, Arnold School of Public Health,  
26 University of South Carolina. 915 Greene Street, Columbia, SC 29208, USA.  
27  
28

29  
30 Shan Qiao, PhD, Department of Health Promotion, Education, & Behavior, Arnold School of  
31 Public Health, University of South Carolina. 915 Greene Street, Columbia, SC 29208, USA.  
32  
33

34  
35 Berry A. Campbell, MD, Department of Obstetrics and Gynecology, School of Medicine,  
36 University of South Carolina. Two Medical Park, Columbia, SC 29203, USA.  
37  
38

39  
40 Bankole Olatosi, PhD, Department of Health Services Policy & Management, Arnold School of  
41 Public Health, University of South Carolina. 915 Greene Street, Columbia, SC 29208, USA.  
42  
43

44  
45 Myriam Torres, PhD, Department of Epidemiology & Biostatistics, Arnold School of Public  
46 Health, University of South Carolina. 915 Greene Street, Columbia, SC 29208, USA.  
47  
48

49  
50 Neset Hikmet, PhD, Department of Integrated Information Technology, College of Engineering  
51 and Computing, University of South Carolina. 550 Assembly Street, Columbia, SC 29208, USA.  
52  
53

1  
2  
3 Xiaoming Li, PhD, Department of Health Promotion, Education, & Behavior, Arnold School of  
4  
5 Public Health, University of South Carolina. 915 Greene Street, Columbia, SC 29208, USA.  
6  
7  
8  
9

10  
11 **Corresponding author:**  
12

13 Dr. Jihong Liu, Professor of Epidemiology, Department of Epidemiology & Biostatistics, Arnold  
14  
15 School of Public Health, University of South Carolina. 915 Greene Street, Columbia, SC 29208,  
16  
17 USA. [jliu@mailbox.sc.edu](mailto:jliu@mailbox.sc.edu). Phone: 803 777 6854  
18  
19  
20  
21  
22  
23  
24  
25  
26  
27  
28  
29  
30  
31  
32  
33  
34  
35  
36  
37  
38  
39  
40  
41  
42  
43  
44  
45  
46  
47  
48  
49  
50  
51  
52  
53  
54  
55  
56  
57  
58  
59  
60

## ABSTRACT

**Introduction:** The COVID-19 pandemic has affected communities of color the hardest. Non-Hispanic Black and Hispanic pregnant women appear to have disproportionate SARS-CoV-2 infection and death rates. Our overarching goal is to investigate racial/ethnic disparities in severe maternal morbidity and mortality (SMMM), the contributing roles and mediating pathways of social contexts (e.g., racial/ethnic residential segregation, racial discrimination in poverty, education, unemployment, and home ownership) and their health consequences postpartum.

**Methods and analysis:** We will use the socio-ecological framework and employ a concurrent triangulation, mixed methods study design to achieve three specific aims: 1) examine the impacts of the COVID-19 pandemic on racial/ethnic disparities in SMMM; 2) explore how social contexts have contributed to the widening of racial/ethnic disparities in SMMM during the pandemic and identify distinct mediating pathways through maternity care and mental health; and 3) determine the role of social contextual factors on racial/ethnic disparities in pregnancy-related morbidities using machine learning algorithms. We will leverage an existing South Carolina COVID-19 Cohort (S3C) by creating a pregnancy cohort that links COVID-19 testing data, electronic health records (EHR), birth and death certificate data, health care utilization data, and billing data for all births in South Carolina between 2018-2021. We will also conduct similar analyses using EHR data from the National COVID Cohort Collaborative (N3C). Nationwide social context databases and effects of time-varying COVID-19 severity and social distancing policies will be added. We will use a convergent parallel design which includes a quantitative analysis of data from South Carolina Pregnancy Risk Assessment and Monitoring System and qualitative interviews of 40 postpartum women and 20 maternal care providers to identify distinct mediating pathways.

1  
2  
3 **Ethics and dissemination:** The study was approved by institutional review boards. Study  
4 findings will be disseminated with key stakeholders including patients, presented at academic  
5 conferences, and published in peer-reviewed journals.  
6  
7  
8  
9  
10  
11  
12  
13  
14  
15  
16  
17  
18  
19  
20  
21  
22  
23  
24  
25  
26  
27  
28  
29  
30  
31  
32  
33  
34  
35  
36  
37  
38  
39  
40  
41  
42  
43  
44  
45  
46  
47  
48  
49  
50  
51  
52  
53  
54  
55  
56  
57  
58  
59  
60

For peer review only

### Strengths and limitations of this study

- This study is among the first efforts to investigate whether the COVID-19 pandemic, structural racism, and racial discrimination have contributed to the racial/ethnic disparities in SMMM in the context of the COVID-19 pandemic.
- This study employs a state-of-the-art design (i.e., a convergent parallel design) and machine learning models to rigorously examine the questions of interest.
- This study will use a large-scale population-based cohort study concurrently for both SC and the U.S., which will innovatively integrate COVID-19-related clinical, surveillance, EHR, and geospatial data at community, healthcare institutions, and system/policy levels.
- The county-level social contexts' effects may not be significant. If that happens, ZIP-code level social contexts will be calculated.
- The stagnant residential social contexts might not reflect their long-term exposures to neighborhood structural racism.

## INTRODUCTION

Annually, nearly 60,000 women experience severe maternal morbidity (i.e., unexpected complications of labor and delivery) and mortality (SMMM).<sup>1,2</sup> Between 1993-2014, SMMM rates in the U.S. tripled from 49.5 to 146.6 per 10,000 childbirths.<sup>3</sup> For every 70 U.S. women who experienced a severe maternal morbidity, one died during or immediately after pregnancy.<sup>4</sup> The severe maternal morbidity occurrences have also led to significant short- or long-term clinical impacts on women's health<sup>5</sup> and added significant costs to women, their families, taxpayers and the healthcare system.<sup>6-8</sup>

Non-Hispanic Black (hereafter, Black) women experience a 3- to 4-fold risk of pregnancy-related deaths compared to non-Hispanic White women (hereafter, White).<sup>9,10</sup> Black and Hispanic women were up to 110 percent more likely to experience SMMM,<sup>2</sup> despite their younger maternal age (often a protective factor for SMMM) as compared to non-Hispanic White women. Such racial/ethnic disparities in SMMM rates have persisted for over a decade – with increasing rates among all race/ethnic groups.<sup>11</sup> These SMMM rates are unevenly distributed socioeconomically and geographically – with the highest rate among low-income women who delivered at hospitals in the Deep South states.<sup>2,12-14</sup>

The unprecedented COVID-19 pandemic hit communities of color the hardest.<sup>15-17</sup> Pregnant Black and Hispanic women experienced disproportionate COVID-19 infection and death rates.<sup>18-20</sup> The impacts of COVID-19 on SMMM remain unclear. During the pandemic, as unemployment, income instability, and financial stress have affected many U.S. families, Black and Hispanic families have faced even higher hardship rates.<sup>21</sup> These disproportionate consequences reflect longstanding inequities, often stemming from structural racism and discrimination (e.g., residential segregation, poverty, inadequate education, unemployment, and lack of home ownership).<sup>22,23</sup> These inequities can lead to uneven access to quality healthcare, psychosocial stress, and unhealthy lifestyles among women of color, which further increases SMMM risk.<sup>24,25</sup> Yet, the etiology of SMMM is complex, multifaceted, and time-varying. Prior



1  
2  
3 research efforts on racial/ethnic disparities in SMMM have mostly focused on maternal and  
4 healthcare factors,<sup>26</sup> leaving questions regarding the dynamics and interactions of multilevel  
5 determinants, such as the broader social contexts of these risks, largely unanswered. Thus, there  
6 is an urgent need to examine how social contexts of all types play out in SMMM rates, especially  
7 during the COVID-19 pandemic.<sup>22,23</sup>

8  
9  
10  
11  
12  
13  
14 South Carolina (SC) ranked 11th in COVID-19 cases per capita as of December 23, 2021.<sup>27</sup>  
15  
16 Prior to the pandemic, SC ranked 42nd in the U.S. in overall health and 41st in maternal  
17 mortality.<sup>28</sup> Births to Black women accounted for nearly 30% of all SC births.<sup>29</sup> Black women  
18 living in SC experienced a 2- to 3-fold higher risk of SMMM than their White counterparts.<sup>30</sup>  
19  
20 The majority of counties in SC are designated medically underserved areas.<sup>31</sup> Considering SC's  
21 poor health ranking, striking racial disparities in SMMM, racially diverse population, and  
22 historical systemic Southern contexts, SC is an ideal environment in which to examine health  
23 disparities in SMMM occurring during the COVID-19 pandemic.

24  
25  
26  
27  
28  
29  
30 The overarching goal of this study is to investigate racial/ethnic disparities in SMMM, the  
31 contributing roles and mediating pathways of social contexts (e.g., structural racism, racial  
32 discrimination), and the long-standing health consequences of the pandemic by studying the  
33 distributions of COVID-19 cases and multilevel determinants of maternal health in SC and the  
34 U.S. Our study will: 1) examine the impacts of the COVID-19 pandemic on racial/ethnic  
35 disparities in SMMM; 2) examine and explore how the key features of social contexts (including  
36 structural racism and racial discrimination) have contributed to the widening racial/ethnic  
37 disparities in SMMM during the pandemic and identify distinct mediating pathways through  
38 maternity care and mental health; and 3) examine and identify the role of social contextual  
39 factors and protective factors on racial/ethnic disparities in pregnancy-related long-standing  
40 morbidities (e.g., hypertension, pulmonary embolism, diabetes, cardiovascular disease), using  
41 machine-based learning algorithms.

## METHODS AND ANALYSIS

### Multilevel Conceptual Framework

The etiology of racial/ethnic disparities in SMMM is complex and multifaceted (**Figure 1**).<sup>24</sup> At the micro-level, in addition to maternal race/ethnicity, other socio-demographics (e.g., age, socioeconomic status [SES]), health behaviors (e.g., prenatal care adequacy, smoking, diet, physical activity, gestational weight gain), and preexisting maternal conditions (e.g., hypertension, pre-pregnancy body mass index (BMI), diabetes, HIV infection) potentially drive racial/ethnic disparities in SMMM.<sup>12,32</sup> As compared to White women, Black and Hispanic women usually have higher poverty rates, lower educational levels, and higher rates of preexisting conditions or high-risk pregnancy.<sup>32</sup> At the macro level, structural racism and discrimination - community and neighborhood factors (e.g., residential segregation, inadequate housing, lack of access to healthy food, no public transportation), healthcare institutional attributes (e.g., access to risk appropriate perinatal care), and system-level factors (e.g. policy) – may play a role in racial/ethnic disparities. These macro-level factors interact with micro-level factors to further exacerbate racial/ethnic disparities in SMMM.

### Study Design

The above-mentioned multilevel conceptual framework guided our study design. We will employ a concurrent triangulation, mixed methods study design to rigorously examine racial/ethnic disparities in SMMM in SC and the U.S. This convergent parallel design will allow us to better understand the underlying mechanisms for social contexts and racial/ethnic disparities in SMMM via maternity care and mental health using the data from the statewide pregnancy survey and via qualitative interviews. Given the multilevel and multidomain nature of risk factors for pregnancy-related long-standing morbidities, we will use novel machine learning models to forecast the intertwining social context effects with multilevel factors on maternal health during the COVID-19 pandemic.

### Data Sources

1  
2  
3 We will leverage our statewide South Carolina COVID-19 Cohort (S3C) database, which  
4 integrates COVID-19-related clinical, surveillance, electronic health records (EHR) and  
5 geospatial and temporal data at community, healthcare institutional, and system levels to  
6 comprehensively examine the roles of social contexts on racial/ethnic disparities in SMMM. To  
7 ensure the generalizability of our findings, we will also examine them using EHR data from the  
8 ongoing National COVID Cohort Collaborative (N3C).<sup>33</sup> Nationwide social context databases  
9 (e.g. American Community Survey [ACS], American Hospital Association [AHA]) and time-  
10 varying COVID-19 infection and social distancing policies data will be added to both S3C and  
11 N3C. Postpartum women's survey responses and in-depth interview data will be analyzed to  
12 understand complex pathways and multilevel determinants of maternal morbidities. **Table 1**  
13 summarizes the objectives, key measures, and data sources for the study.  
14  
15

16  
17  
18 *SC COVID-19 Cohort – Pregnancy (S3C-P) Database.* With support from the National  
19 Institute of Allergy and Infectious Disease (NIAID) (R01A127203-4S1), our team has established  
20 a statewide S3C database for COVID-19 research since 06/2020 by integrating various state-  
21 level data sources including: 1) the COVID-19 testing data from the SC Department of Health  
22 and Environmental Control (SC DHEC), 2) hospital encounter data for inpatient hospitalization,  
23 outpatient surgery, home health, and emergency departments; 3) health utilization data from  
24 large public and private health insurance plans (e.g., Medicaid, State Health Plan, BlueCross  
25 BlueShield of SC); 4) EHR data from health systems (Prisma & MUSC), and 5) program data  
26 from the SC Department of Mental Health (SC DMH). The database is updated every 6 months.  
27  
28

29  
30  
31 In this study, with support from NIAID (R01A127203-5S2), our team will create a  
32 population based S3C pregnant women cohort, which includes all women who gave birth  
33 between 2018-2021 in SC (>200,000 births, 57.2% White, 31.1% Black, 4.6% Hispanic) and will  
34 add vital record data (birth and death certificates) to complement existing linkages from the  
35 parent S3C cohort. The identification of pregnancy status and COVID-19 infection will be cross-  
36 verified using EHR, claims data, laboratory reports, and ongoing SC DHEC medical chart  
37  
38  
39  
40  
41  
42  
43  
44  
45  
46  
47  
48  
49  
50  
51  
52  
53  
54  
55  
56  
57  
58  
59  
60

1  
2  
3 reviews among > 4,387 pregnant women with confirmed COVID-19 infections in SC as of  
4  
5 December 2021. The SC Office of Revenue and Fiscal Affairs (SC RFA) will collate databases  
6  
7 and provide our team with a de-identified linked database system.<sup>34</sup>  
8

9       *National COVID Cohort Collaborative (N3C).* The N3C is a novel data consortium that  
10 integrates EHR and medical claims data from 92 healthcare systems and institutes across 50  
11 states. N3C enables data sharing, computable phenotypes, and collaborative data mining by  
12 harmonizing EHR data of diverse standards using Observational Medical Outcomes Partnership  
13 (OMOP) Clinical Data Model (CDM). N3C was created to study potential risk factors and  
14 protective factors of COVID-19 and its long-term health consequences.<sup>33</sup> As of December 24,  
15 2021, N3C has aggregated 9.4 million patients (3.3 million COVID-19 patients) with their EHR  
16 dating back from January 2018, including 1.9 million women with COVID-19 (>61k pregnant  
17 women), and 3.5 million women without COVID-19 (>209k pregnant women). The participants  
18 in N3C represent diverse populations in the U.S. (e.g., geographic, socioeconomic,  
19 racial/ethnic). Building on a secured cloud environment, N3C provides data harmonization,  
20 privacy-preserving data linkage, and high-performance data analytics. Our team has already  
21 gained access to the restricted N3C database including ZIP codes of patients and health systems  
22 and dates of services.  
23  
24  
25  
26  
27  
28  
29  
30  
31  
32  
33  
34  
35  
36  
37

38       *Nationwide social context databases.* The 2015-2019 American Community Survey (ACS)  
39 and the 2015-2019 American Hospital Association (AHA) Annual Survey will be used to  
40 calculate county-level residential segregation measures, racial discrimination in SES, and ZIP-  
41 level accessibility to hospital-based obstetric units.  
42  
43  
44  
45  
46

47       *Time-varying local COVID-19 infection and social-distancing policy data.* To better  
48 understand local pandemic settings, we will also add the Centers for Disease Control and  
49 Prevention (CDC) COVID-19 Case Surveillance restricted datasets for nationwide cases  
50 confirmed since March 11, 2020, and CDC's state-level social distancing policies (e.g. emergency  
51  
52  
53  
54  
55  
56  
57  
58  
59  
60

1  
2  
3 declaration, stay at home order, etc.) in early pandemic and telehealth services expansion data  
4  
5 and each corresponding date of enactment.<sup>35</sup>  
6

7 *SC Pregnancy Risk Assessment Monitoring System (PRAMS)*. SC PRAMS as a part of  
8  
9 national PRAMS is an ongoing survey of SC mothers who have recently given birth.<sup>36</sup> These  
10  
11 mothers are sampled from state birth certificates. After statistical weighting, PRAMS data are  
12  
13 representative of all mothers who gave birth in SC. SC PRAMS added 11 COVID-19-related  
14  
15 questions for mothers who delivered in August 2020 and after in their survey. SC PRAMS  
16  
17 routinely collects detailed psychosocial and behavioral risk factors for each participant, which  
18  
19 are not available in S3C and N3C. Residential ZIP codes will be used to add in social contextual  
20  
21 variables and other ZIP- or county-level characteristics. The unweighted sample size for SC  
22  
23 2018-2021 PRAMS will be at least 2,000.  
24  
25

#### 26 Key Measures

27  
28 *Outcome measures*. The main outcomes of interest will be SMMM.<sup>37</sup> We will adapt from a  
29  
30 previously validated algorithm by using the International Classification of Diseases, Tenth  
31  
32 Revision, Clinical Modification (ICD-10-CM) diagnosis and procedure codes to identify women  
33  
34 with one or more of the 21 SMM indicators developed by the CDC and updated by the Alliance  
35  
36 for Innovation on Maternal Health (AIM) program at the time of childbirth. Maternal mortality  
37  
38 will be identified using statewide death certificate data from the childbirth date to up to one year  
39  
40 postpartum. A composite variable of SMMM will be created to reflect SMM or maternal  
41  
42 mortality incidence. We will also study maternal morbidity and mortality (MMM) composite,  
43  
44 which includes mortality and morbidities related to hypertensive disorders of pregnancy,  
45  
46 postpartum hemorrhage, and infections/sepsis that happen during pregnancy through 6 weeks  
47  
48 postpartum.<sup>38</sup> Other outcomes to be studied include: 1) adverse maternal outcomes including  
49  
50 intensive care unit (ICU) admission, invasive ventilation, receipt of extracorporeal membrane  
51  
52 oxygenation (ECMO), etc.; 2) prolonged length of stay (LOS),<sup>39,40</sup> and 3) hypertension,  
53  
54  
55  
56  
57  
58  
59  
60

1  
2  
3 pulmonary embolism, type 2 diabetes, cardiovascular diseases (e.g. heart attack, myocardia  
4 infraction, thrombus, stroke) diagnosed within one year after delivery (**Table 1**).

5  
6  
7 *COVID-19 status and severity.* Eligible COVID-19 cases are those with a positive test for  
8 SARS-CoV-2 since March 11, 2020, during pregnancy. Data on symptom status (symptomatic,  
9 asymptomatic, unknown) is available, while severity will be defined using the World Health  
10 Organization's (WHO) Clinical Progression Scale.<sup>41</sup>

11  
12  
13  
14  
15  
16 *Social context measures.* The five dimensions of county-level *residential segregation*,  
17 including evenness, exposure, concentration, centralization, and clustering,<sup>42,43</sup> will be  
18 determined for each race/ethnic group (e.g., Black, Hispanic) using the ACS Census tract  
19 data.<sup>44,45</sup> Each index will be calculated across census tracts within residential counties. Higher  
20 values indicate higher levels of segregation. We will create the group indicator for segregated  
21 versus less segregated counties using the cutoffs for each dimension index.<sup>45</sup> Additional hyper-  
22 segregation index – segregations scores at  $\geq 0.6$  on at least four aforementioned dimensions –  
23 will be created to reflect the highest levels of segregation.<sup>45</sup> Within-county *racial/ethnic*  
24 *discrimination in SES* will be calculated using the ACS county data,<sup>44</sup> including Black-White and  
25 Hispanic-White ratios of poverty, unemployment, and home ownership rates.<sup>46-50</sup> These  
26 measures will be linked to databases via maternal residence counties.

27  
28  
29  
30  
31  
32  
33  
34  
35  
36  
37  
38 *Healthcare institution.* Using the AHA annual survey data on hospital location,<sup>51</sup> we will  
39 identify *loss of hospital-based obstetric units* using our published validated algorithm.<sup>52-54</sup> An  
40 indicator for whether a hospital or a hospital's obstetric service was closed for each year will be  
41 created. In turn, women's access to hospital-based obstetric care within 30-mile distance for  
42 years 2018-2020 using the ArcGIS fastest route network will be determined: 1) had access to; 2)  
43 no access to; and 3) experienced the loss of all hospital-based obstetric units.

44  
45  
46  
47  
48  
49  
50  
51 *County-level COVID-19 infections and social distancing policies.* The CDC's COVID-19 Case  
52 Surveillance will be used to compute monthly cumulative rates of in-county residents that had  
53 been confirmed COVID-19 positive, hospitalized, admitted to an intensive care unit, and with  
54  
55  
56  
57

1  
2  
3 mechanical ventilation (MV)/intubation as a result of COVID-19 disease. Number of months  
4 elapsed since a county had each of the following policy orders will be calculated from a delivery  
5 date: emergency declaration, closures of bars, restaurants, and/or other non-essential business,  
6 stay at home order, and telehealth services expansion.  
7  
8  
9

## 10 11 Statistical Analyses

### 12 *Impacts of the COVID-19 pandemic on racial/ethnic disparities in SMMM.*

13  
14  
15 We will examine the overall impacts of the COVID-19 pandemic on SMMM using the data  
16 from the S3C-P and N3C (**Table 1**). We hypothesize that: 1) compared to pre-pandemic periods,  
17 SMMM has increased during the pandemic and racial/ethnic disparities have widened during  
18 the pandemic; and 2) compared to pregnant women without COVID-19 infection, women with  
19 COVID-19 infection experienced higher proportions of SMMM, and racial/ethnic disparities in  
20 SMMM have amplified among COVID-19 infected women.  
21  
22  
23  
24  
25  
26  
27

28 First, we will examine the distributions for all measures and clean the database (e.g. outliers,  
29 data entry errors etc.) using appropriate statistical techniques. Second, we will conduct  
30 preliminary analyses and examine descriptive statistics for outcome measures. Unadjusted and  
31 adjusted associations of SMMM with key variables and covariates will be assessed using  
32 appropriate statistical procedures (e.g., tests of proportions, chi-square tests, analysis of  
33 variance).  
34  
35  
36  
37  
38  
39

40 Women who gave birth between January 1, 2018 through March 10, 2020, will be  
41 categorized as before pandemic, while women who gave birth between March 11, 2020 through  
42 December 31, 2021, will be considered as during the pandemic. The pre-pandemic vs pandemic  
43 impact on SMMM will be modeled via logistic regression. First, the crude model with the  
44 pandemic indicator only will address SMMM change before and after the pandemic. Second, to  
45 investigate whether racial/ethnic disparities in SMMM have widened during the pandemic, the  
46 crude model will be further adjusted with race/ethnicity, interactions between race/ethnicity  
47 and pandemic indicator, and months elapsed since March 11, 2020, on delivery dates. Then  
48  
49  
50  
51  
52  
53  
54  
55  
56  
57  
58  
59  
60

1  
2  
3 additional variables will be added, including individual-level characteristics (e.g., age, SES proxy  
4 [i.e., Medicaid/uninsured status], parity, marital status, underlying health conditions). Variable  
5 selection and goodness of model fit will be evaluated using the AIC, BIC, and likelihood ratio  
6 test.  
7  
8  
9  
10

11 We will also conduct analyses in women who delivered during the COVID-19 pandemic by  
12 comparing pregnant women with and without COVID-19 infection. We will first create the  
13 COVID infection indicator and then will perform the similar analysis as those for the pre-  
14 pandemic vs pandemic impact. We will further adjust for county-level COVID-19 infections per  
15 capita and social distancing policies at the appropriate time points using logistic regressions  
16 with random effects accounting for correlations among counties.  
17  
18  
19  
20  
21  
22  
23

24 *Social contexts, racial/ethnic disparities in SMMM, and distinct mediating pathways.*  
25

26 We will study these issues using different databases and methods. First, we will examine the  
27 association between social contexts and changes in racial/ethnic disparities in SMMM before  
28 and during the pandemic. We hypothesize that racial/ethnic disparities SMMM are potentially  
29 disproportionately widened in communities with higher racial/ethnic economic disparities  
30 (measured by Black-White ratios of economic disadvantages, Hispanic-White ratios of economic  
31 disadvantages) and in higher vs. less segregated Black or Hispanic counties (measured by  
32 residential segregation). We will conduct a parallel analysis between social contexts and SMMM  
33 using the data from S3C-P and N3C (**Table 1**). Similarly, we will examine the contributing roles  
34 of social contexts to racial/ethnic disparities in SMMM in the overall sample (pre-pandemic vs  
35 pandemic) and between COVID-19 positive vs COVID-19 negative women. The multilevel  
36 variables that will be investigated include individual-level characteristics, community-level  
37 characteristics (ZIP code accessibility of hospital obstetric units), and county-level characteristic  
38 (social contexts: residential segregation and racial discrimination on SES; COVID-19 infection  
39 per capita and social distancing policies). For exploratory analysis, the odds ratio (OR) of  
40 SMMM among Black and White and the social context level at the county level pre-pandemic vs  
41  
42  
43  
44  
45  
46  
47  
48  
49  
50  
51  
52  
53  
54  
55  
56  
57  
58  
59  
60



1  
2  
3 pandemic will be visualized via the spatial temporal map using GIS. The summary statistics in  
4  
5 SMMM with respect to race/ethnicity will be calculated according to individual- and county-  
6  
7 level characteristic.  
8

9  
10 **Table 1. Summary of key measures and data sources by objectives**

| Objectives                                                                                                                              | Key Outcomes                                                                                                                                                           | Key Independent Variables                                                                                                                                                                                | Data Sources                         |
|-----------------------------------------------------------------------------------------------------------------------------------------|------------------------------------------------------------------------------------------------------------------------------------------------------------------------|----------------------------------------------------------------------------------------------------------------------------------------------------------------------------------------------------------|--------------------------------------|
| COVID-19 pandemic and maternal health disparity                                                                                         | <ul style="list-style-type: none"> <li>• SMMM (Primary)</li> <li>• MMM</li> <li>• Adverse maternal outcomes</li> <li>• Prolonged LOS</li> </ul>                        | <ul style="list-style-type: none"> <li>• Race/ethnicity</li> <li>• Delivery time since March 2020</li> </ul>                                                                                             | S3C <sup>1</sup><br>N3C <sup>2</sup> |
| Social contexts, and maternal health disparity and distinct mediating pathways through maternity care and mental health during COVID-19 | <ul style="list-style-type: none"> <li>• SMMM (Primary)</li> <li>• MMM</li> <li>• Adverse maternal outcomes</li> <li>• Prolonged LOS</li> </ul>                        | <ul style="list-style-type: none"> <li>• Race/ethnicity</li> <li>• Social contextual factors</li> <li>• COVID-19 status and severity</li> <li>• Delivery time since March 2020</li> </ul>                | S3C <sup>1</sup><br>N3C <sup>2</sup> |
|                                                                                                                                         | <ul style="list-style-type: none"> <li>• MMM</li> </ul>                                                                                                                | <ul style="list-style-type: none"> <li>• Race/ethnicity</li> <li>• Social contextual factors</li> <li>• COVID-19 pandemic stressors</li> <li>• Mental health status</li> <li>• Perinatal care</li> </ul> | PRAMS                                |
| Social and clinical factors for disparities in long-standing morbidities                                                                | <ul style="list-style-type: none"> <li>• Hypertensive disorder</li> <li>• Pulmonary embolism</li> <li>• Type II diabetes</li> <li>• Cardiovascular diseases</li> </ul> | <ul style="list-style-type: none"> <li>• Maternal-level factors</li> <li>• Social contextual factors</li> <li>• System-level factors</li> </ul>                                                          | N3C <sup>2</sup>                     |

37  
38 <sup>1</sup>. SC COVID-19 Pregnancy Cohort (S3C-P) includes >200,000 women with childbirths in 01/2018-12/2021  
39 and >4,387 pregnant women with confirmed COVID-19 infections as of December 2021.

40 <sup>2</sup>. National COVID Cohort Collaborative (N3C) contains >61K pregnant women with COVID and  
41 >209K pregnant women without COVID-19.  
42

43 We will model SMMM via multilevel hierarchical logistic regression. Women who reside at  
44 the same community- or county-level will be accounted for via random effects, which will be  
45 further modeled in the regression model with a multivariate normal distribution to account for  
46 the correlations among community or county. We plan to use an incremental modeling strategy:  
47 1) crude model (race/ethnicity and social context factors); 2) adjusting for individual level  
48 factors; and 3) additional adjustment of additional community- and county-levels  
49 characteristics. For N3C data, we will further adjust for state or Census region. To further  
50  
51  
52  
53  
54  
55  
56  
57  
58  
59  
60

1  
2  
3 examine whether social contexts moderate racial/ethnic disparities in SMMM and whether  
4 these disparities vary between pre-pandemic and pandemic, we will include two-way and three-  
5 way interaction terms in the model (e.g., pandemic period\*social context\*race). To examine the  
6 added impact of COVID-19 infections on SMMM, we will repeat the model by restricting it to all  
7 women who gave birth during pandemic period (delivered after March 11, 2020) and including  
8 maternal COVID-19 severity status in the model. Models will be compared using the AIC and  
9 BIC criteria. In the modelling procedure, the outliers, missingness, multicollinearity, and  
10 nonlinear will be addressed accordingly, and sensitivity analysis will be conducted comparing  
11 models with or without the treatment of outliers or missing data. The magnitude and direction  
12 racial/ethnic disparities will be assessed through OR and its 95% confidence interval.

13  
14  
15  
16  
17  
18  
19  
20  
21  
22  
23  
24  
25  
26  
27  
28  
29  
30  
31  
32  
33  
34  
35  
36  
37  
38  
39  
40  
41  
42  
43  
44  
45  
46  
47  
48  
49  
50  
51  
52  
53  
54  
55  
56  
57  
58  
59  
60  
Second, we will evaluate the underlying pathways between social contexts and racial/ethnic  
disparities in MMM via pandemic stressors, maternity care (prenatal and postpartum) and  
mental health condition. We hypothesize that social contexts might hinder maternity care and  
worsen mental health conditions among Black and Hispanic women during the pandemic and  
exacerbate racial/ethnic disparities in MMM.

We will use a convergent parallel design to examine the impact of social contexts on  
maternal health and complex pathways between multilevel determinants. We will analyze data  
from the quantitative and qualitative methods independently and interpret findings jointly.

The quantitative analysis will be conducted using SC PRAMS data, which have unique data  
elements that are not available in S3C-P and N3C. The 2018-2021 SC PRAMS data will provide a  
more refined understanding of COVID-19 stressors, psychosocial stress, and healthcare  
utilization through the questionnaire, including pandemic stressors (financial, job loss,  
childcare, etc.), individual mitigation practices, changes in prenatal and postpartum care,  
psychosocial stress, barriers to health services, intimate partner violence (IPV), prenatal and  
postpartum care utilization, smoking, alcohol use, gestational weight gain, and mental health.  
SC PRAMS asks respondents to assess how often they experienced depressive symptoms after

1  
2  
3 delivery. Descriptive statistics will be used to examine pandemic-related changes in MMM and  
4 psychosocial and behavioral changes between pre-pandemic (delivered before March 11, 2020)  
5 and pandemic periods (March 11, 2020 and after). The weighted hierarchical regression model  
6 will be applied to examine the association between social context and MMM. As previously  
7 mentioned, community and county levels will also be modeled in the regression. Different from  
8 the prior analyses above: 1) individual characteristics will mainly come from PRAMS or birth  
9 certificates; 2) the weight based on complex survey design will be modeled; and 3) individual  
10 reports of healthcare utilization and mental health condition included.

11  
12 We will conduct in-depth qualitative interviews among 40 postpartum women of color (~20  
13 African American; ~20 Hispanic) stratified by COVID-19 infection status and 20 maternal care  
14 providers (MCPs) who serve pregnant and postpartum women in Black and Latino  
15 communities. The inclusion criteria of postpartum women include: 1)  $\geq 18$  years old; 2) either  
16 African American or Hispanic; 3) have given birth within one year; and 4) living in SC. We will  
17 purposely recruit postpartum women and MCPs through local OBGYN clinics and community  
18 health organizations that serve a larger proportion of low-income Black and Hispanic women.  
19 We will train female interviewers of the same race as the interviewees to obtain trust from the  
20 postpartum women participants, and interviews in Spanish will be conducted as needed. Guided  
21 by the conceptual framework, the main topics of the postpartum women interviews will include:  
22 1) their perceptions toward their healthcare providers and institutions for perinatal care; 2)  
23 experience with prenatal and postpartum care; 3) stressors in the COVID-19 pandemic; 4)  
24 challenges in healthcare seeking (e.g., appointments, clinic visits), especially from structural  
25 factors (racism and discrimination); and 5) their needs/recommendations for future healthcare.  
26 The main topics of the MCPs include: 1) stressors and challenges of their clients; 2) clients'  
27 mental health conditions; 3) impacts of COVID-19 on their care provision; and 4) their views on  
28 health disparities caused by structural factors. The interviews will last 50 minutes and will be  
29 recorded with each participant's consent. Audio recordings will be transcribed and coded using

1  
2  
3 NVivo 11.0. We will employ thematic analyses.<sup>55</sup> The findings will complement the quantitative  
4 data in providing a comprehensive picture on how COVID-19 affects psychosocial well-being of  
5 the postpartum women of color; offer in-depth interpretation and explanation of quantitative  
6 results; and explore the mediating pathways in which structural factors amplify existing  
7 disparities in maternal health in the context of the pandemic.  
8  
9  
10  
11  
12

### 13 *Machine learning-based predictive models.*

14  
15 We will develop and evaluate machine learning-based predictive models to identify risk  
16 factors of SMMM and forecast progression of hypertensive disorder, pulmonary conditions, type  
17 2 diabetes mellitus, and cardiovascular diseases among postpartum women. The predictive  
18 models will synthesize individuals' demographics, EHR, social contextual factors, and  
19 community and healthcare system level data to make predictions of individuals' clinical  
20 outcomes at key time points. Because data sources suggestive of these factors are variable and  
21 high-dimensional, and these factors are inherently interconnected over time,<sup>56</sup> machine learning  
22 is a superior approach to predicting clinical outcomes and proactively detecting the associated  
23 risk factors for early intervention and treatment. Constructed models will demonstrate critical  
24 factors predictive of clinical outcomes and how these factors interact over time.  
25  
26  
27  
28  
29  
30  
31  
32  
33  
34  
35

36 Supervised machine learning will be adopted for the predictive models. Using N3C, the  
37 machine will learn from input variables and predict SMMM and long-standing morbidities (e.g.,  
38 hypertension, pulmonary embolism, diabetes, cardiovascular diseases) over time. Input  
39 variables will include maternal characteristics, e.g., socio-demographics, socio-behavioral data,  
40 social context variables, diagnoses, procedures, laboratory tests, and medications. The  
41 prediction of SMMM and long-standing morbidities will take place at critical time points: < 3, 6,  
42 12 weeks, 6 and 12 months postpartum.<sup>57</sup> We will develop Deep Learning algorithms because of  
43 their ability to integrate complex clinical data and social contexts from multiple sources with  
44 superior predictive performance, including: 1) convolutional neural network (CNN) for its  
45 ability to capture dynamic patterns among multilevel input variables; 2) recurrent neural  
46  
47  
48  
49  
50  
51  
52  
53  
54  
55  
56  
57  
58  
59  
60

1  
2  
3 network (RNN) with long short-term memory (LSTM) architecture for its ability of capturing  
4 temporal patterns of clinical events (e.g., pre-infection conditions, childbirths); and 3) Deep  
5 Boltzmann Machine (DBM) for its interpretable scoring mechanism for risk prediction.<sup>58</sup>  
6  
7

8  
9 We will use a 10-fold cross validation. Specifically, S3C and N3C data will each be randomly  
10 partitioned into ten splits. In each of the ten iterations, nine splits of data will be randomly  
11 selected for model training and the 10th split used for testing. We will use F measure, precision,  
12 recall, and the area under the Receiver Operating Characteristic curve (AUC), if unbalanced  
13 data, to measure the predictive performance of models. We will use support vector machine  
14 (SVM) as the baseline algorithm to compare against the performance of CNN, RNN (LSTM), and  
15 DBM. The best-performed model will be identified based on F measure.  
16  
17

18  
19 We will rank input variables and/or clusters of input variables by calculating the importance  
20 scores <sup>56</sup> (e.g., mutual information, SVM-based recursive linear elimination). Two content co-  
21 investigators will independently review the ranked results and identify clinical/social risk  
22 factors. Disagreement between two reviewers will be resolved by panel discussion. Development  
23 of sophisticated machine learning models for predicting long-standing morbidities will be used  
24 to identify important risk factors prenatally, which can be used for early intervention, treatment,  
25 and community-wide interventions.  
26  
27

28  
29 *Power and Sample Size Calculation.* We estimate that there are 200,000 women who gave  
30 birth in S3C and 270,000 pregnant women in N3C for our study period. The primary outcome of  
31 interest is SMM and the main exposures of interest are race (White vs Black) and pre-peri  
32 COVID period. We assume that there are 64,000 (32%) Black and 114,000 (57%) White in S3C<sup>59</sup>  
33 and 38,070(14.1%) Black and 160,380 (59.4%) White in N3C.<sup>60</sup> We also assume that with the  
34 same time length of pre and peri COVID-19, the prevalence of pregnancy will be similar (50%).  
35 For all aims, we consider the logistic regression with mixed effects. Based on 1.5%-2.5%  
36 incidence of SMM with 20%-50% increase due to the COVID -19 impact or race disparities, we  
37 conduct the power analysis based on the logistic regression using SAS and conclude that  
38  
39  
40  
41  
42  
43  
44  
45  
46  
47  
48  
49  
50  
51  
52  
53  
54  
55  
56  
57  
58  
59  
60

1  
2  
3 200,000 sample size will be adequate to reach the power around 90%. **Figure 2** illustrates the  
4 relationship of power and odds ratio with setting of  $n=200,000$ , significance at 0.05, variable of  
5 interest with a ratio of 10:90. This will be the basic model considered, and it indicates strong  
6 power for the prediction model.  
7  
8  
9

### 10 Patient and Public Involvement

11  
12  
13 No patient involvement in the design, conduct and reporting of our research. We will  
14 actively reach out patients and public in the dissemination of our findings.  
15  
16  
17

## 18 **DISCUSSION**

19  
20 The COVID-19 pandemic has led to unprecedented societal disruptions to individuals,  
21 communities, healthcare institutions, and society. Empirical data on the scope of possible  
22 widening racial/ethnic disparities in SMMM during the COVID-19 pandemic and how historical  
23 structural racism and discrimination of all types have impacted women of color  
24 disproportionately are sparse. This study will be among the first efforts to investigate whether the  
25 COVID-19 pandemic, structural racism, and racial discrimination— exposures with broad scale  
26 and reach – have contributed to the racial/ethnic disparities in SMMM in the context of the  
27 COVID-19 pandemic. Second, this proposed study employs a state-of-the-art design (i.e., a  
28 convergent parallel design) to comprehensively examine the impacts of structural racism and  
29 discrimination on maternal health and the complex pathways between multilevel determinants.  
30 This design has the advantage of allowing us to weigh both quantitative and qualitative methods  
31 equally and interpret the results together.<sup>61</sup> Third, the proposed study will innovatively use  
32 machine learning models to predict SMMM and chronic morbidities up to one year after  
33 delivery in the context of the COVID-19 pandemic. Fourth, we propose a large-scale population-  
34 based cohort study concurrently for both SC and the U.S., which will innovatively integrate  
35 COVID-19-related clinical, surveillance, EHR, and geospatial data at community, healthcare  
36 institutions, and system/policy levels. These newly integrated data sources will allow us to  
37 examine multilevel determinants of maternal health during the pandemic and advance the  
38  
39  
40  
41  
42  
43  
44  
45  
46  
47  
48  
49  
50  
51  
52  
53  
54  
55  
56  
57  
58  
59  
60

1  
2  
3 investigation on racial/ethnic disparities in long-standing complications post-pandemic. In  
4  
5 brief, this research represents a significant and innovative contribution to the research on the  
6  
7 unacceptable racial/ethnic disparities in SMMM during pregnancy and postpartum in the  
8  
9 context of COVID-19. By focusing on social contextual factors (e.g., structural racism), we seek  
10  
11 to identify ways in which the largest number of women may be impacted by targeted programs  
12  
13 and policies aiming to alter the context in which these morbidities and mortality occur.  
14

15  
16 This study also has some limitations. First, it is possible that the county-level social contexts'  
17  
18 effects in our data may not be significant. If that happens, we will calculate ZIP-code level social  
19  
20 contexts. By assessing racial segregations, spatial distribution of economic disadvantage  
21  
22 communities within a residence county and within-community racial discrimination, this study  
23  
24 will provide evidence on the associations between distinct social contexts and maternal health  
25  
26 disparities. Second, considering some women may move during pregnancy, the stagnant  
27  
28 residential social contexts might not reflect their long-term exposures to neighborhood  
29  
30 structural racism. Furthermore, in the case of inferior F measures ( $<0.7$ ) of learning predictive  
31  
32 models, we will apply feature selection algorithms and association rules in model training to  
33  
34 maximize performance.  
35

36  
37 In conclusion, the rising SMMM rate and persistent racial/ethnic disparities should trigger  
38  
39 public health concerns, not only due to the immediate burden faced by vulnerable women, but  
40  
41 also due to potentially lasting effects on women's health over a life course or along family lines  
42  
43 across generations.<sup>62</sup> This study will investigate racial/ethnic disparities in SMMM, the  
44  
45 contributing roles and mediating pathways of social contexts (e.g., structural racism, racial  
46  
47 discrimination), and the long-standing health consequences of the pandemic by studying the  
48  
49 distributions of COVID-19 cases and multilevel determinants of maternal health in a racially,  
50  
51 socioeconomically, and geographically diverse population of U.S. pregnant women. A rigorous  
52  
53 examination of social contexts and racial/ethnic disparities in SMMM during the pandemic will  
54  
55 contribute to the identification of factors with a broad scale and reach for programmatic and  
56  
57  
58  
59  
60

1  
2  
3 policy interventions to alter the context in which morbidity and mortality occur. Our findings  
4  
5 will inform continuing efforts to reverse the rising trends of SMMM in the U.S.  
6  
7  
8  
9  
10  
11  
12  
13  
14  
15  
16  
17  
18  
19  
20  
21  
22  
23  
24  
25  
26  
27  
28  
29  
30  
31  
32  
33  
34  
35  
36  
37  
38  
39  
40  
41  
42  
43  
44  
45  
46  
47  
48  
49  
50  
51  
52  
53  
54  
55  
56  
57  
58  
59  
60

For peer review only



**List of abbreviations**

ACS: American Community Survey

AHA: American Hospital Association

AIM: Alliance for Innovation on Maternal Health program

AUC: Receiver Operating Characteristic Curve

Black: Non-Hispanic Black

BMI: Body Mass Index

CDC: Centers for Disease Control and Prevention

CDM: Clinical Data Model

CNN: Convolutional Neural Network

DBM: Deep Boltzmann Machine

ECMO: Extracorporeal Membrane Oxygenation

EHR: Electronic Health Records

ICU: Intensive Care Unit

ICD-10-CM: the International Classification of Diseases, Tenth Revision, Clinical Modification

IPV: Intimate Partner Violence

IRB: Institutional Review Board

LOS: Prolonged Length of Stay

LSTM: Long Short-Term Memory

MCPs: Maternal Care Providers

MMM: Maternal Morbidity and Mortality

MV: Mechanical Ventilation

N3C: National COVID Cohort Collaborative

NCATS: the National Center for Advancing Translational Sciences

NIAID: National Institute of Allergy and Infectious Disease

NIH: National Institutes of Health

1  
2  
3 OMOP: Observational Medical Outcomes Partnership  
4

5 OR: Odds Ratio  
6

7 PRAMS: Pregnancy Risk Assessment and Monitoring System  
8

9 RNN: Recurrent Neural Network  
10

11 S3C: South Carolina COVID-19 Cohort  
12

13 S3C-P: South Carolina COVID-19 Cohort-Pregnancy  
14

15 SC: South Carolina  
16

17 SC DHEC: SC Department of Health and Environmental Control  
18

19 SC DMH: South Carolina Department of Mental Health  
20

21 SC RFA: SC Office of Revenue and Fiscal Affairs  
22

23 SES: Socioeconomic Status  
24

25 SMMM: Severe Maternal Morbidity and Mortality  
26

27 SVM: Support Vector Machine  
28

29 UofSC: University of South Carolina  
30

31 White: Non-Hispanic White  
32

33 WHO: World Health Organization  
34  
35  
36  
37  
38  
39  
40  
41  
42  
43  
44  
45  
46  
47  
48  
49  
50  
51  
52  
53  
54  
55  
56  
57  
58  
59  
60

## Declarations

*Ethics approval and consent to participate.*

The study was approved by the institutional review boards at **University of South Carolina** (Pro00115169) and **SC Department of Health and Environmental Control** (DHEC IRB.21-030).

The NIH's N3C data access committee approved the data use request for this project (RP-2B9622).

*Consent for publication*

Not applicable.

*Availability of data and materials*

The South Carolina data (S3C) that support the findings for this study are available from the SC Office of Revenue and Fiscal Affairs (RFA) upon reasonable request. Per our contract with SC RFA, only approved users have access to the data and data cannot be made publicly available by authors. N3C data can be accessed through the NCATS N3C Data Enclave for approved users (<https://covid.cd2h.org>).

*Author's contributions*

JL conceptualized and designed the study and wrote the first draft. PH, CL, JZ, SQ and XL participated in writing sections of the original proposal. All authors critically reviewed and edited the manuscript and had final responsibility for the decision to submit for publication.

*Funding*

This study is supported by the National Institute of Allergy and Infectious Diseases of the National Institutes of Health under Award Number R01AI127203-5S2. Li and Liu are the MPIs for this study. The funder had no role in the design of this study and will not have any role during its execution, analyses, interpretation of the data, or decision to submit results.

*Competing interests*

The authors declare that they have no competing interests.

*Acknowledgements*

1  
2  
3 The authors thank SC Department of Health and Environmental Control, SC Revenue and Fiscal  
4 Affairs office, and other SC agencies for contributing the data in South Carolina. The authors  
5 also want to thank the organizations ([https://ncats.nih.gov/n3c/resources/data-](https://ncats.nih.gov/n3c/resources/data-contribution/data-transfer-agreement-signatories)  
6 [contribution/data-transfer-agreement-signatories](https://ncats.nih.gov/n3c/resources/data-contribution/data-transfer-agreement-signatories)) and scientists who have contributed to the  
7 on-going development of N3C database [<https://doi.org/10.1093/jamia/ocaa196>].  
8  
9  
10  
11  
12

13 *Word Count*

14  
15 5030 words  
16  
17  
18  
19  
20  
21  
22  
23  
24  
25  
26  
27  
28  
29  
30  
31  
32  
33  
34  
35  
36  
37  
38  
39  
40  
41  
42  
43  
44  
45  
46  
47  
48  
49  
50  
51  
52  
53  
54  
55  
56  
57  
58  
59  
60

For peer review only

## References

1. Creanga AA, Berg CJ, Ko JY, Farr SL, Tong VT, Bruce FC, et al. Maternal mortality and morbidity in the United States: where are we now? *J Womens Health (Larchmt)*. 2014;23(1):3-9.
2. Centers for Disease Control and Prevention. Infographic: Racial/Ethnic Disparities in Pregnancy-Related Deaths - United States, 2007-2016. <https://www.cdc.gov/reproductivehealth/maternal-mortality/disparities-pregnancy-related-deaths/infographic.html>. Accessed April 5, 2021.
3. Centers for Disease Control and Prevention. Rates in Severe Morbidity Indicators per 10,000 Delivery Hospitalizations, 1993-2014. <https://www.cdc.gov/reproductivehealth/maternalinfanthealth/smm/rates-severe-morbidity-indicator.htm>. Accessed April 5, 2021.
4. Centers for Disease Control and Prevention. Maternal Mortality. <https://www.cdc.gov/reproductivehealth/maternal-mortality/index.html>. Accessed March 27, 2021.
5. Centers for Disease Control and Prevention. Pregnancy Complications. *Reproductive Health* <https://www.cdc.gov/reproductivehealth/maternalinfanthealth/pregnancy-complications.html>. Accessed April 5, 2021.
6. National Public Radio. Nearly dying in childbirth: why preventable complications are growing in the US. 2017; <https://www.npr.org/2017/12/22/572298802/nearly-dying-in-childbirth-why-preventable-complications-are-growing-in-u-s>. Accessed April 5, 2021.
7. Vesco KK, Ferrante S, Chen Y, Rhodes T, Black CM, Allen-Ramey F. Costs of Severe Maternal Morbidity During Pregnancy in US Commercially Insured and Medicaid Populations: An Observational Study. *Matern Child Health J*. 2020;24(1):30-38.
8. Hao J, Hassen D, Hao Q, Graham J, Paglia MJ, Brown J, et al. Maternal and Infant Health Care Costs Related to Preeclampsia. *Obstet Gynecol*. 2019;134(6):1227-1233.

- 1  
2  
3 9. Admon LK, Winkelman TNA, Zivin K, Terplan M, Mhyre JM, Dalton VK. Racial and  
4  
5 Ethnic Disparities in the Incidence of Severe Maternal Morbidity in the United States,  
6  
7 2012-2015. *Obstet Gynecol.* 2018;132(5):1158-1166.  
8
- 9  
10 10. Declercq E, Zephyrin L. Maternal Mortality in the United States: A Primer. *The*  
11  
12 *Commonwealth Fund, Data Brief* 2020;  
13  
14 [https://www.commonwealthfund.org/publications/issue-brief-](https://www.commonwealthfund.org/publications/issue-brief-report/2020/dec/maternal-mortality-united-states-primer)  
15  
16 [report/2020/dec/maternal-mortality-united-states-primer](https://www.commonwealthfund.org/publications/issue-brief-report/2020/dec/maternal-mortality-united-states-primer). Accessed March 27, 2021.  
17
- 18 11. Fingar KR, Hambrick MM, Heslin KC, Moore JE. Trends and Disparities in Delivery  
19  
20 Hospitalizations Involving Severe Maternal Morbidity, 2006-2015: Statistical Brief  
21  
22 #243. *Healthcare Cost and Utilization Project (HCUP) Statistical Briefs*. Rockville  
23  
24 (MD)2018.  
25
- 26 12. Wang E, Glazer KB, Howell EA, Janevic TM. Social Determinants of Pregnancy-Related  
27  
28 Mortality and Morbidity in the United States: A Systematic Review. *Obstet Gynecol.*  
29  
30 2020;135(4):896-915.  
31
- 32 13. Howell EA, Egorova NN, Janevic T, Brodman M, Balbierz A, Zeitlin J, et al. Race and  
33  
34 Ethnicity, Medical Insurance, and Within-Hospital Severe Maternal Morbidity  
35  
36 Disparities. *Obstet Gynecol.* 2020;135(2):285-293.  
37
- 38 14. Chen J, Cox S, Kuklina EV, Ferre C, Barfield W, Li R. Assessment of Incidence and  
39  
40 Factors Associated With Severe Maternal Morbidity After Delivery Discharge Among  
41  
42 Women in the US. *JAMA Netw Open.* 2021;4(2):e2036148.  
43  
44
- 45 15. Gold JAW, Rossen LM, Ahmad FB, Sutton P, Li Z, Salvatore PP, et al. Race, Ethnicity,  
46  
47 and Age Trends in Persons Who Died from COVID-19 - United States, May-August 2020.  
48  
49 *MMWR Morb Mortal Wkly Rep.* 2020;69(42):1517-1521.  
50
- 51 16. Emeruwa UN, Spiegelman J, Ona S, Kahe K, Miller RS, Fuchs KM, et al. Influence of  
52  
53 Race and Ethnicity on Severe Acute Respiratory Syndrome Coronavirus 2 (SARS-CoV-2)  
54  
55  
56  
57  
58  
59  
60

- 1  
2  
3 Infection Rates and Clinical Outcomes in Pregnancy. *Obstet Gynecol.* 2020;136(5):1040-  
4 1043.  
5  
6  
7 17. Grechukhina O, Greenberg V, Lundsberg LS, Deshmukh U, Cate J, Lipkind HS, et al.  
8 Coronavirus disease 2019 pregnancy outcomes in a racially and ethnically diverse  
9 population. *Am J Obstet Gynecol MFM.* 2020;2(4):100246.  
10  
11  
12 18. Ellington S, Strid P, Tong VT, Woodworth K, Galang RR, Zambrano LD, et al.  
13 Characteristics of Women of Reproductive Age with Laboratory-Confirmed SARS-CoV-2  
14 Infection by Pregnancy Status - United States, January 22-June 7, 2020. *MMWR Morb*  
15 *Mortal Wkly Rep.* 2020;69(25):769-775.  
16  
17  
18 19. Zambrano LD, Ellington S, Strid P, Galang RR, Oduyebo T, Tong VT, et al. Update:  
19 Characteristics of Symptomatic Women of Reproductive Age with Laboratory-Confirmed  
20 SARS-CoV-2 Infection by Pregnancy Status - United States, January 22-October 3, 2020.  
21 *MMWR Morb Mortal Wkly Rep.* 2020;69(44):1641-1647.  
22  
23  
24 20. Moore JT, Ricaldi JN, Rose CE, Fuld J, Parise M, Kang GJ, et al. Disparities in Incidence  
25 of COVID-19 Among Underrepresented Racial/Ethnic Groups in Counties Identified as  
26 Hotspots During June 5-18, 2020 - 22 States, February-June 2020. *MMWR Morb*  
27 *Mortal Wkly Rep.* 2020;69(33):1122-1126.  
28  
29  
30 21. National Public Radio. The Impact of Coronavirus on Households in Major U.S. Cities.  
31 2020; <https://media.npr.org/assets/img/2020/09/08/cities-report-090920-final.pdf>.  
32 Accessed April 5, 2021.  
33  
34  
35 22. McCloskey L, Amutah-Onukagha N, Bernstein J, Handler A. Setting the Agenda for  
36 Reproductive and Maternal Health in the Era of COVID-19: Lessons from a Cruel and  
37 Radical Teacher. *Matern Child Health J.* 2021;25(2):181-191.  
38  
39  
40 23. Onwuzurike C, Meadows AR, Nour NM. Examining Inequities Associated With Changes  
41 in Obstetric and Gynecologic Care Delivery During the Coronavirus Disease 2019  
42 (COVID-19) Pandemic. *Obstet Gynecol.* 2020;136(1):37-41.  
43  
44  
45  
46  
47  
48  
49  
50  
51  
52  
53  
54  
55  
56  
57  
58  
59  
60

- 1  
2  
3  
4  
5  
6  
7  
8  
9  
10  
11  
12  
13  
14  
15  
16  
17  
18  
19  
20  
21  
22  
23  
24  
25  
26  
27  
28  
29  
30  
31  
32  
33  
34  
35  
36  
37  
38  
39  
40  
41  
42  
43  
44  
45  
46  
47  
48  
49  
50  
51  
52  
53  
54  
55  
56  
57  
58  
59  
60
24. Howell EA. Reducing Disparities in Severe Maternal Morbidity and Mortality. *Clin Obstet Gynecol*. 2018;61(2):387-399.
  25. Westgren M, Pettersson K, Hagberg H, Acharya G. Severe maternal morbidity and mortality associated with COVID-19: The risk should not be downplayed. *Acta Obstet Gynecol Scand*. 2020;99(7):815-816.
  26. Allen EH, Benatar S. Maternity Care Financing: Challenges and Opportunities Highlighted by the COVID-19 Pandemic. Robert Wood Johnson Foundation; The Urban Institute; 2020.
  27. Statista. Rate of coronavirus (COVID-19) cases in the United States as of December 16, 2021, by state(per 100,000 people). <https://www.statista.com/statistics/1109004/coronavirus-covid19-cases-rate-us-americans-by-state/>. Accessed December 23, 2021.
  28. National Center for Health Statistics. Maternal Mortality by State, 2018. 2018; <https://www.cdc.gov/nchs/maternal-mortality/MMR-2018-State-Data-508.pdf>. Accessed March 27, 2021.
  29. Kaiser Family Foundation. Number of Births By Race. 2018; <https://www.kff.org/other/state-indicator/births-by-raceethnicity/?dataView=1&currentTimeframe=0&sortModel=%7B%22colId%22:%22Black%22,%22sort%22:%22desc%22%7D>. Accessed March 27, 2021.
  30. South Carolina State House. South Carolina Maternal Morbidity and Mortality Review Committee. Legislative Brief March 2020. 2020; <https://www.scstatehouse.gov/reports/DHEC/mmmr-2020-Final.pdf>. Accessed April 2, 2021.
  31. South Carolina Department of Health and Environmental Control. Health Professional Shortage Area (HPSA). <https://scdhec.gov/health-professionals/health-professional-shortage-area-hpsa>.



- 1  
2  
3 32. Leonard SA, Main EK, Scott KA, Profit J, Carmichael SL. Racial and ethnic disparities in  
4 severe maternal morbidity prevalence and trends. *Ann Epidemiol*. 2019;33:30-36.  
5  
6  
7 33. Haendel MA, Chute CG, Bennett TD, Eichmann DA, Guinney J, Kibbe WA, et al. The  
8 National COVID Cohort Collaborative (N3C): Rationale, design, infrastructure, and  
9 deployment. *J Am Med Inform Assoc*. 2021;28(3):427-443.  
10  
11  
12  
13 34. Olatosi B, Zhang J, Weissman S, Hu J, Haider MR, Li X. Using big data analytics to  
14 improve HIV medical care utilisation in South Carolina: A study protocol. *BMJ Open*.  
15 2019;9(7):e027688.  
16  
17  
18 35. Centers for Disease Control and Prevention. U.S. State and Territorial Gathering Bans:  
19 March 11-December 31, 2020 by County by Day. 2021;  
20 [https://catalog.data.gov/dataset/u-s-state-and-territorial-gathering-bans-march-11-](https://catalog.data.gov/dataset/u-s-state-and-territorial-gathering-bans-march-11-december-31-2020-by-county-by-day-79295)  
21 [december-31-2020-by-county-by-day-79295](https://catalog.data.gov/dataset/u-s-state-and-territorial-gathering-bans-march-11-december-31-2020-by-county-by-day-79295). Accessed April 3, 2021.  
22  
23  
24  
25  
26  
27  
28 36. Shulman HB, D'Angelo DV, Harrison L, Smith RA, Warner L. The Pregnancy Risk  
29 Assessment Monitoring System (PRAMS): Overview of Design and Methodology. *Am J*  
30 *Public Health*. 2018;108(10):1305-1313.  
31  
32  
33  
34 37. Centers for Disease Control and Prevention. How Does CDC Identify Severe Maternal  
35 Mortality?  
36 [https://www.cdc.gov/reproductivehealth/maternalinfanthealth/smm/severe-morbidity-](https://www.cdc.gov/reproductivehealth/maternalinfanthealth/smm/severe-morbidity-ICD.htm)  
37 [ICD.htm](https://www.cdc.gov/reproductivehealth/maternalinfanthealth/smm/severe-morbidity-ICD.htm). Accessed April 3, 2021.  
38  
39  
40  
41  
42  
43 38. Chakhtoura N, Chinn JJ, Grantz KL, Eisenberg E, Artis Dickerson S, Lamar C, et al.  
44 Importance of research in reducing maternal morbidity and mortality rates. *Am J Obstet*  
45 *Gynecol*. 2019;221(3):179-182.  
46  
47  
48  
49 39. Blumenfeld YJ, El-Sayed YY, Lyell DJ, Nelson LM, Butwick AJ. Risk Factors for  
50 Prolonged Postpartum Length of Stay Following Cesarean Delivery. *Am J Perinatol*.  
51 2015;32(9):825-832.  
52  
53  
54  
55  
56  
57  
58  
59  
60

- 1  
2  
3  
4  
5  
6  
7  
8  
9  
10  
11  
12  
13  
14  
15  
16  
17  
18  
19  
20  
21  
22  
23  
24  
25  
26  
27  
28  
29  
30  
31  
32  
33  
34  
35  
36  
37  
38  
39  
40  
41  
42  
43  
44  
45  
46  
47  
48  
49  
50  
51  
52  
53  
54  
55  
56  
57  
58  
59  
60
40. Srinivas SK, Small DS, Macheras M, Hsu JY, Caldwell D, Lorch S. Evaluating the impact of the laborist model of obstetric care on maternal and neonatal outcomes. *Am J Obstet Gynecol*. 2016;215(6):770 e771-770 e779.
41. W. H. O. Working Group on the Clinical Characterisation Management of Covid-infection. A minimal common outcome measure set for COVID-19 clinical research. *Lancet Infect Dis*. 2020;20(8):e192-e197.
42. Mehra R, Boyd LM, Ickovics JR. Racial residential segregation and adverse birth outcomes: A systematic review and meta-analysis. *Soc Sci Med*. 2017;191:237-250.
43. Mehra R, Keene DE, Kershaw TS, Ickovics JR, Warren JL. Racial and ethnic disparities in adverse birth outcomes: Differences by racial residential segregation. *SSM Popul Health*. 2019;8:100417.
44. United States Census Bureau. Appendix B: Measures of Residential Segregation. <https://www.census.gov/topics/housing/housing-patterns/guidance/appendix-b.html>. Accessed April 3, 2021.
45. Massey DS, White MJ, Phua V-C. The Dimensions of Segregation Revisited. *Sociol Methods Res*. 1996;25:172-206.
46. Do DP, Frank R, Finch BK. Does SES explain more of the black/white health gap than we thought? Revisiting our approach toward understanding racial disparities in health. *Soc Sci Med*. 2012;74(9):1385-1393.
47. Farmer MM, Ferraro KF. Are racial disparities in health conditional on socioeconomic status? *Soc Sci Med*. 2005;60(1):191-204.
48. Franks P, Muennig P, Lubetkin E, Jia H. The burden of disease associated with being African-American in the United States and the contribution of socio-economic status. *Soc Sci Med*. 2006;62(10):2469-2478.
49. Ritter JA, Taylor LJ. Racial Disparity in Unemployment. *The Review of Economics and Statistics*. 2011;93(1):30-42.

- 1  
2  
3 50. Bell CN, Owens-Young JL. Self-Rated Health and Structural Racism Indicated by  
4 County-Level Racial Inequalities in Socioeconomic Status: The Role of Urban-Rural  
5 Classification. *J Urban Health*. 2020;97(1):52-61.  
6  
7  
8  
9 51. American Hospital Association Hospital Statistics. 2019 AHA Annual Survey American  
10 Hospital Association. 2020;  
11  
12 <https://www.ahadata.com/system/files/media/file/2020/10/2019AHAAnnual.pdf>.  
13  
14  
15 52. Hung P, Henning-Smith CE, Casey MM, Kozhimannil KB. Access To Obstetric Services  
16 In Rural Counties Still Declining, With 9 Percent Losing Services, 2004-14. *Health Aff*  
17 *(Millwood)*. 2017;36(9):1663-1671.  
18  
19  
20  
21 53. Kozhimannil KB, Hung P, Henning-Smith C, Casey MM, Prasad S. Association Between  
22 Loss of Hospital-Based Obstetric Services and Birth Outcomes in Rural Counties in the  
23 United States. *JAMA*. 2018;319(12):1239-1247.  
24  
25  
26  
27 54. Hung P, Casey MM, Kozhimannil KB, Karaca-Mandic P, Moscovice IS. Rural-urban  
28 differences in access to hospital obstetric and neonatal care: how far is the closest one? *J*  
29 *Perinatol*. 2018;38(6):645-652.  
30  
31  
32  
33 55. Braun V, Clarke V. What can "thematic analysis" offer health and wellbeing researchers?  
34 *Int J Qual Stud Health Well-being*. 2014;9:26152.  
35  
36  
37  
38 56. Chmielewska B, Barratt I, Townsend R, Kalafat E, van der Meulen J, Gurol-Urganci I, et  
39 al. Effects of the COVID-19 pandemic on maternal and perinatal outcomes: a systematic  
40 review and meta-analysis. *Lancet Glob Health*. 2021.  
41  
42  
43  
44 57. ACOG Committee Opinion No. 736: Optimizing Postpartum Care. *Obstet Gynecol*.  
45 2018;131(5):e140-e150.  
46  
47  
48 58. Goodfellow I, Bengio Y, Courville A, Bengio Y. *Deep learning*. Vol 1. Cambridge: MIT  
49 Press; 2016.  
50  
51  
52  
53  
54  
55  
56  
57  
58  
59  
60

- 1  
2  
3 59. SC Department of Health and Environmental Control. SCAN Birth Certificate Data.  
4  
5 [https://apps.dhec.sc.gov/Health/SCAN\\_BDP/tables/birthtable.aspx](https://apps.dhec.sc.gov/Health/SCAN_BDP/tables/birthtable.aspx). Accessed January  
6  
7 26, 2021.  
8  
9 60. Yang X, Zhang J, Chen S, Olatosi B, Bruner L, Diedhiou A, et al. Demographic  
10  
11 Disparities in Clinical Outcomes of COVID-19: Data From a Statewide Cohort in South  
12  
13 Carolina. *Open Forum Infect Dis*. 2021;8(9):ofab428.  
14  
15 61. Creswell JW, Plano Clark VL. *Designing and Conducting Mixed Methods Research*. 2nd  
16  
17 Edition ed. Los Angeles: Sage Publications; 2011.  
18  
19 62. Society for Women's Health Research. The Disproportionate Impact of COVID-19 on  
20  
21 Women of Color. 2020; [https://swhr.org/the-disproportionate-impact-of-covid-19-on-](https://swhr.org/the-disproportionate-impact-of-covid-19-on-women-of-color/)  
22  
23 [women-of-color/](https://swhr.org/the-disproportionate-impact-of-covid-19-on-women-of-color/). Accessed April 3, 2021.  
24  
25  
26  
27  
28  
29  
30  
31  
32  
33  
34  
35  
36  
37  
38  
39  
40  
41  
42  
43  
44  
45  
46  
47  
48  
49  
50  
51  
52  
53  
54  
55  
56  
57  
58  
59  
60

1  
2  
3  
4  
5  
6  
7  
8  
9  
10  
11  
12  
13  
14  
15  
16  
17  
18  
19  
20  
21  
22  
23  
24  
25  
26  
27  
28  
29  
30  
31  
32  
33  
34  
35  
36  
37  
38  
39  
40  
41  
42  
43  
44  
45  
46  
47  
48  
49  
50  
51  
52  
53  
54  
55  
56  
57  
58  
59  
60

**Figure 1. Compounding Effects of the COVID-19 Pandemic and Structural Racism and Discrimination**

**Figure 2. Estimated Power According to Prevalence of Outcomes and Odds Ratios**

For peer review only

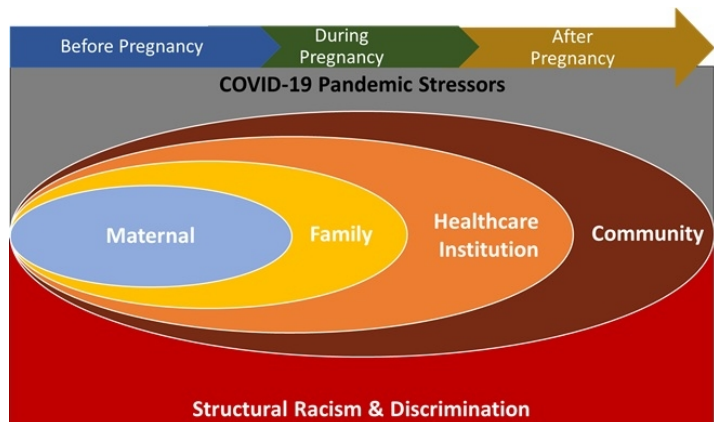

Figure 1

195x128mm (120 x 120 DPI)

1  
2  
3  
4  
5  
6  
7  
8  
9  
10  
11  
12  
13  
14  
15  
16  
17  
18  
19  
20  
21  
22  
23  
24  
25  
26  
27  
28  
29  
30  
31  
32  
33  
34  
35  
36  
37  
38  
39  
40  
41  
42  
43  
44  
45  
46  
47  
48  
49  
50  
51  
52  
53  
54  
55  
56  
57  
58  
59  
60

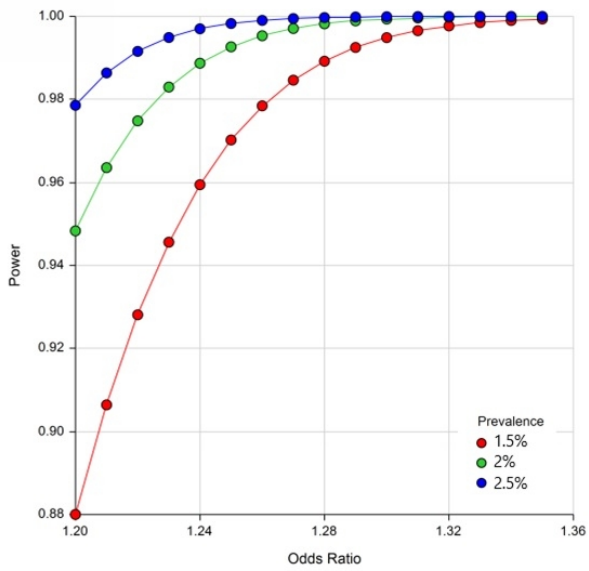

Figure 2  
195x128mm (120 x 120 DPI)

# BMJ Open

## Multilevel determinants of racial/ethnic disparities in severe maternal morbidity and mortality in the context of the COVID-19 pandemic in the United States: protocol for a concurrent triangulation, mixed methods study

|                                 |                                                                                                                                                                                                                                                                                                                                                                                                                                                                                                                                                                                                                                                                                                                                                                                                                                                                                                                                                                                               |
|---------------------------------|-----------------------------------------------------------------------------------------------------------------------------------------------------------------------------------------------------------------------------------------------------------------------------------------------------------------------------------------------------------------------------------------------------------------------------------------------------------------------------------------------------------------------------------------------------------------------------------------------------------------------------------------------------------------------------------------------------------------------------------------------------------------------------------------------------------------------------------------------------------------------------------------------------------------------------------------------------------------------------------------------|
| Journal:                        | <i>BMJ Open</i>                                                                                                                                                                                                                                                                                                                                                                                                                                                                                                                                                                                                                                                                                                                                                                                                                                                                                                                                                                               |
| Manuscript ID                   | bmjopen-2022-062294.R1                                                                                                                                                                                                                                                                                                                                                                                                                                                                                                                                                                                                                                                                                                                                                                                                                                                                                                                                                                        |
| Article Type:                   | Protocol                                                                                                                                                                                                                                                                                                                                                                                                                                                                                                                                                                                                                                                                                                                                                                                                                                                                                                                                                                                      |
| Date Submitted by the Author:   | 05-May-2022                                                                                                                                                                                                                                                                                                                                                                                                                                                                                                                                                                                                                                                                                                                                                                                                                                                                                                                                                                                   |
| Complete List of Authors:       | Liu, Jihong; University of South Carolina, Department of Epidemiology & Biostatistics<br>Hung, Peiyin ; University of South Carolina, Health Services Policy and Management<br>Liang, Chen; University of South Carolina, Department of Health Services Policy & Management<br>Zhang, Jiajia; University of South Carolina, Department of Epidemiology and Biostatistics, Arnold School of Public Health<br>Qiao, Shan; University of South Carolina,<br>Campbell, Berry; University of South Carolina, Department of Obstetrics and Gynecology; University of South Carolina, Department of Health Services Policy & Management<br>Olatosi, Bankole; University of South Carolina Arnold School of Public Health, Health Services, Policy and Management<br>Torres, Myriam; University of South Carolina System<br>Hikmet, Neset; University of South Carolina, Department of Integrated Information Technology<br>Li, Xiaoming; University of South Carolina Arnold School of Public Health |
| <b>Primary Subject Heading</b>: | Public health                                                                                                                                                                                                                                                                                                                                                                                                                                                                                                                                                                                                                                                                                                                                                                                                                                                                                                                                                                                 |
| Secondary Subject Heading:      | Epidemiology, Health informatics, Qualitative research, Obstetrics and gynaecology                                                                                                                                                                                                                                                                                                                                                                                                                                                                                                                                                                                                                                                                                                                                                                                                                                                                                                            |
| Keywords:                       | COVID-19, Health informatics < BIOTECHNOLOGY & BIOINFORMATICS, EPIDEMIOLOGY, Maternal medicine < OBSTETRICS, PERINATOLOGY, PUBLIC HEALTH                                                                                                                                                                                                                                                                                                                                                                                                                                                                                                                                                                                                                                                                                                                                                                                                                                                      |
|                                 |                                                                                                                                                                                                                                                                                                                                                                                                                                                                                                                                                                                                                                                                                                                                                                                                                                                                                                                                                                                               |

SCHOLARONE™  
Manuscripts



1  
2  
3 **Multilevel determinants of racial/ethnic disparities in severe maternal morbidity**  
4 **and mortality in the context of the COVID-19 pandemic in the United States:**  
5 **protocol for a concurrent triangulation, mixed methods study**  
6  
7  
8

9  
10 **Jihong Liu,<sup>1</sup> Peiyin Hung,<sup>2,3</sup> Chen Liang,<sup>2,3</sup> Jiajia Zhang,<sup>1,3</sup> Shan Qiao,<sup>3</sup> Berry A.**  
11 **Campbell,<sup>5</sup> Bankole Olatosi,<sup>2,3</sup> Myriam Torres,<sup>1</sup> Neset Hikmet,<sup>3,6</sup> Xiaoming Li.<sup>3,4</sup>**  
12  
13

14  
15 <sup>1</sup> Department of Epidemiology & Biostatistics, Arnold School of Public Health, University of  
16 South Carolina. 915 Greene Street, Columbia, SC 29208, USA.  
17

18  
19  
20 <sup>2</sup> Department of Health Services Policy & Management, Arnold School of Public Health,  
21 University of South Carolina. 915 Greene Street, Columbia, SC 29208, USA.  
22

23  
24 <sup>3</sup> Big Data Health Science Center, University of South Carolina, 915 Greene Street, Columbia, SC  
25 29208, USA.  
26

27  
28  
29 <sup>4</sup> Department of Health Promotion, Education, & Behavior, Arnold School of Public Health,  
30 University of South Carolina. 915 Greene Street, Columbia, SC 29208, USA.  
31

32  
33  
34 <sup>5</sup> Berry A. Campbell, MD, Department of Obstetrics and Gynecology, School of Medicine,  
35 University of South Carolina. Two Medical Park, Columbia, SC 29203, USA.  
36

37  
38  
39 <sup>6</sup> Department of Integrated Information Technology, College of Engineering and Computing,  
40 University of South Carolina. 550 Assembly Street, Columbia, SC 29208, USA.  
41

42  
43  
44  
45  
46 **Corresponding author:**

47  
48  
49 Dr. Jihong Liu, Professor of Epidemiology, Department of Epidemiology & Biostatistics, Arnold  
50 School of Public Health, University of South Carolina. 915 Greene Street, Columbia, SC 29208,  
51 USA. [jliu@mailbox.sc.edu](mailto:jliu@mailbox.sc.edu). Phone: 803 777 6854  
52  
53  
54  
55  
56  
57  
58  
59  
60

## ABSTRACT

**Introduction:** The COVID-19 pandemic has affected communities of color the hardest. Non-Hispanic Black and Hispanic pregnant women appear to have disproportionate SARS-CoV-2 infection and death rates.

**Methods and analysis:** We will use the socio-ecological framework and employ a concurrent triangulation, mixed methods study design to achieve three specific aims: 1) examine the impacts of the COVID-19 pandemic on racial/ethnic disparities in severe maternal morbidity and mortality (SMMM); 2) explore how social contexts (e.g., racial/ethnic residential segregation) have contributed to the widening of racial/ethnic disparities in SMMM during the pandemic and identify distinct mediating pathways through maternity care and mental health; and 3) determine the role of social contextual factors on racial/ethnic disparities in pregnancy-related morbidities using machine learning algorithms. We will leverage an existing South Carolina COVID-19 Cohort (S3C) by creating a pregnancy cohort that links COVID-19 testing data, electronic health records (EHR), vital records data, healthcare utilization data, and billing data for all births in South Carolina (SC) between 2018-2021 (>200,000 births). We will also conduct similar analyses using EHR data from the National COVID Cohort Collaborative (N3C) including >209,000 women who had a childbirth between 2018-2021 in the United States. We will use a convergent parallel design which includes a quantitative analysis of data from the 2018-2021 SC Pregnancy Risk Assessment and Monitoring System (unweighted n > 2,000) and in-depth interviews of 40 postpartum women and 10 maternal care providers to identify distinct mediating pathways.

**Ethics and dissemination:** The study was approved by institutional review boards at the University of SC (Pro00115169) and the SC Department of Health and Environmental Control (DHEC IRB.21-030). Informed consent will be provided by the participants in the in-depth

1  
2  
3 interviews. Study findings will be disseminated with key stakeholders including patients,  
4  
5 presented at academic conferences, and published in peer-reviewed journals.  
6  
7

### 8 **Strengths and limitations of this study**

9

- 10 • This study investigates whether the COVID-19 pandemic, structural racism, and racial  
11 discrimination have contributed to the racial/ethnic disparities in severe maternal  
12 morbidity and mortality in the United States.  
13
- 14 • This study employs a state-of-the-art design (i.e., a convergent parallel design) and  
15 machine learning models to rigorously examine the questions of interest.  
16
- 17 • This study will use a large-scale population-based cohort study concurrently for both  
18 South Carolina and the United States, which will innovatively integrate COVID-19-  
19 related clinical, surveillance, EHR, and geospatial data at community, healthcare  
20 institutions, and system/policy levels.  
21
- 22 • The effects of both county- and ZIP-code-level social contexts will be calculated at the  
23 maternal residence location.  
24
- 25 • The stagnant residential social contexts might not reflect their long-term exposures to  
26 neighborhood structural racism.  
27  
28  
29  
30  
31  
32  
33  
34  
35  
36  
37  
38  
39  
40  
41  
42  
43  
44  
45  
46  
47  
48  
49  
50  
51  
52  
53  
54  
55  
56  
57  
58  
59  
60

## INTRODUCTION

Annually, nearly 60,000 women experience severe maternal morbidity (i.e., unexpected complications of labor and delivery) and mortality (SMMM).<sup>1,2</sup> Between 1993-2014, SMMM rates in the U.S. tripled from 49.5 to 146.6 per 10,000 childbirths.<sup>3</sup> For every 70 U.S. women who experienced a severe maternal morbidity, one died during or immediately after pregnancy.<sup>4</sup> The severe maternal morbidity occurrences have also led to significant short- or long-term clinical impacts on women's health<sup>5</sup> and added significant costs to women, their families, taxpayers and the healthcare system.<sup>6-8</sup>

Non-Hispanic Black (hereafter, Black) women experience a 3- to 4-fold risk of pregnancy-related deaths compared to non-Hispanic White women (hereafter, White).<sup>9,10</sup> Black and Hispanic women were up to 110 percent more likely to experience SMMM,<sup>2</sup> despite their younger maternal age (often a protective factor for SMMM) as compared to non-Hispanic White women. Such racial/ethnic disparities in SMMM rates have persisted for over a decade – with increasing rates among all race/ethnic groups.<sup>11</sup> These SMMM rates are unevenly distributed socioeconomically and geographically – with the highest rate among low-income women who delivered at hospitals in the Deep South states.<sup>2,12-14</sup>

The unprecedented COVID-19 pandemic hit communities of color the hardest.<sup>15-17</sup> Pregnant Black and Hispanic women experienced disproportionate COVID-19 infection and death rates.<sup>18-20</sup> The impacts of COVID-19 on SMMM remain unclear. During the pandemic, as unemployment, income instability, and financial stress have affected many U.S. families, Black and Hispanic families have faced even higher hardship rates.<sup>21</sup> These disproportionate consequences reflect longstanding inequities, often stemming from structural racism and discrimination (e.g., residential segregation, poverty, inadequate education, unemployment, and lack of home ownership).<sup>22,23</sup> These inequities can lead to uneven access to quality healthcare, psychosocial stress, and unhealthy lifestyles among women of color, which further increases SMMM risk.<sup>24,25</sup> Yet, the etiology of SMMM is complex, multifaceted, and time-varying. Prior

1  
2  
3 research efforts on racial/ethnic disparities in SMMM have mostly focused on maternal and  
4 healthcare factors,<sup>26</sup> leaving questions regarding the dynamics and interactions of multilevel  
5 determinants, such as the broader social contexts of these risks, largely unanswered. Thus, there  
6 is an urgent need to examine how social contexts of all types play out in SMMM rates, especially  
7 during the COVID-19 pandemic.<sup>22,23</sup>

8  
9  
10  
11  
12  
13 South Carolina (SC) ranked 11th in COVID-19 cases per capita as of December 23, 2021.<sup>27</sup>  
14 Prior to the pandemic, SC ranked 42nd in the U.S. in overall health and 41st in maternal  
15 mortality.<sup>28</sup> Births to Black women accounted for nearly 30% of all SC births.<sup>29</sup> Black women  
16 living in SC experienced a 2- to 3-fold higher risk of SMMM than their White counterparts.<sup>30</sup>  
17 The majority of counties in SC are designated medically underserved areas.<sup>31</sup> Considering SC's  
18 poor health ranking, striking racial disparities in SMMM, racially diverse population, and  
19 historical systemic Southern contexts, SC is an ideal environment in which to examine health  
20 disparities in SMMM occurring during the COVID-19 pandemic.

21  
22  
23  
24  
25  
26  
27  
28  
29  
30 The overarching goal of this study is to investigate racial/ethnic disparities in SMMM, the  
31 contributing roles and mediating pathways of social contexts (e.g., structural racism, racial  
32 discrimination), and the long-standing health consequences of the pandemic by studying the  
33 distributions of COVID-19 cases and multilevel determinants of maternal health in SC and the  
34 U.S. Our study will: 1) examine the impacts of the COVID-19 pandemic on racial/ethnic  
35 disparities in SMMM; 2) examine and explore how the key features of social contexts (including  
36 structural racism and racial discrimination) have contributed to the widening racial/ethnic  
37 disparities in SMMM during the pandemic and identify distinct mediating pathways through  
38 maternity care and mental health; and 3) examine and identify the role of social contextual  
39 factors and protective factors on racial/ethnic disparities in pregnancy-related long-standing  
40 morbidities (e.g., hypertension, pulmonary embolism, diabetes, cardiovascular disease), using  
41 machine learning algorithms.

## METHODS AND ANALYSIS

### Multilevel Conceptual Framework

The etiology of racial/ethnic disparities in SMMM is complex and multifaceted (**Figure 1**).<sup>24</sup> At the micro-level, in addition to maternal race/ethnicity, other socio-demographics (e.g., age, socioeconomic status [SES]), health behaviors (e.g., prenatal care adequacy, smoking, diet, physical activity, gestational weight gain), and preexisting maternal conditions (e.g., hypertension, pre-pregnancy body mass index (BMI), diabetes, HIV infection, obstetric comorbidity scores) potentially drive racial/ethnic disparities in SMMM.<sup>12,32,33</sup> As compared to White women, Black and Hispanic women usually have higher poverty rates, lower educational levels, and higher rates of preexisting conditions or high-risk pregnancy.<sup>32</sup> At the macro level, structural racism and discrimination - community and neighborhood factors (e.g., residential segregation, inadequate housing, lack of access to healthy food, no public transportation), healthcare institutional attributes (e.g., access to risk appropriate perinatal care), and system-level factors (e.g. COVID-19 pandemic, state public health emergency policies) may play a role in racial/ethnic disparities. These macro-level factors interact with micro-level factors to further exacerbate racial/ethnic disparities in SMMM.

### Study Design

The above-mentioned multilevel conceptual framework guided our study design (Figure 2). We will employ a concurrent triangulation, mixed methods study design to rigorously examine racial/ethnic disparities in SMMM in SC and the U.S. This convergent parallel design will allow us to better understand the underlying mechanisms for social contexts and racial/ethnic disparities in SMMM via maternity care and mental health using the data from the statewide pregnancy survey and via qualitative interviews with pregnancy and postpartum women and maternity care providers. Given the multilevel and multidomain nature of risk factors for pregnancy-related long-standing morbidities, we will use novel machine learning models to forecast the intertwining social context effects with multilevel factors on maternal health during

1  
2  
3 the COVID-19 pandemic. We will conduct data analyses using the quantitative and qualitative  
4 methods concurrently. Then we will compare and contrast findings from these two methods for  
5 similarities and incongruences and will interpret findings jointly.  
6  
7  
8

### 9 Data Sources

10  
11 We will leverage our statewide South Carolina COVID-19 Cohort (S3C) database, which  
12 integrates COVID-19-related clinical, surveillance, electronic health records (EHR) and  
13 geospatial and temporal data at community, healthcare institutional, and system levels to  
14 comprehensively examine the roles of social contexts on racial/ethnic disparities in SMMM. To  
15 ensure the generalizability of our findings, we will also examine them using EHR data from the  
16 ongoing National COVID Cohort Collaborative (N3C).<sup>34</sup> Nationwide social context databases  
17 (e.g. American Community Survey [ACS], American Hospital Association [AHA]) and time-  
18 varying COVID-19 infection and social distancing policies data will be added to both S3C and  
19 N3C. Postpartum women's survey responses and in-depth interview data will be analyzed to  
20 understand complex pathways and multilevel determinants of maternal morbidities (Figure 2).  
21  
22  
23  
24  
25  
26  
27  
28  
29  
30  
31

32 *SC COVID-19 Cohort – Pregnancy (S3C-P) Database.* With support from the National  
33 Institute of Allergy and Infectious Disease (NIAID) (R01A127203-4S1), our team has established  
34 a statewide S3C database for COVID-19 research since 06/2020 by integrating various state-  
35 level data sources including: 1) the COVID-19 testing data from the SC Department of Health  
36 and Environmental Control (SC DHEC), 2) hospital encounter data for inpatient hospitalization,  
37 outpatient surgery, home health, and emergency departments; 3) health utilization data from  
38 large public and private health insurance plans (e.g., Medicaid, State Health Plan, BlueCross  
39 BlueShield of SC); 4) EHR data from health systems (Prisma & MUSC), and 5) program data  
40 from the SC Department of Mental Health (SC DMH). The database is updated every 6 months.  
41  
42  
43  
44  
45  
46  
47  
48  
49  
50

51 In this study, as part of the National Institutes of Health (NIH)'s “Implementing a Maternal  
52 health and PRenancy Outcomes Vision for Everyone” (IMPROVE) initiative supported by the  
53 Office of Director, NIH (3R01A127203-5S2), our team will create a population based S3C  
54  
55  
56  
57  
58  
59  
60

1  
2  
3 pregnant women cohort (S3C-P), which includes all women who gave birth between 2018-2021  
4 in SC (>200,000 births, 57.2% White, 31.1% Black, 4.6% Hispanic) and will add vital record data  
5 (birth and death certificates) to complement existing linkages from the parent S3C cohort. The  
6 identification of pregnancy status and COVID-19 infection will be cross-verified using EHR,  
7 claims data, laboratory reports, and ongoing SC DHEC medical chart reviews among > 4,387  
8 pregnant women with confirmed COVID-19 infections in SC as of December 2021. The SC  
9 Office of Revenue and Fiscal Affairs (SC RFA) will collate databases and provide our team with a  
10 de-identified linked database system.<sup>35</sup>

11  
12  
13  
14  
15  
16  
17  
18  
19  
20 *National COVID Cohort Collaborative (N3C)*. The N3C is a novel data consortium that  
21 integrates EHR and medical claims data from 92 healthcare systems and institutes across 50  
22 states. N3C enables data sharing, computable phenotypes, and collaborative data mining by  
23 harmonizing EHR data of diverse standards using Observational Medical Outcomes Partnership  
24 (OMOP) Clinical Data Model (CDM). N3C was created to study potential risk factors and  
25 protective factors of COVID-19 and its long-term health consequences.<sup>34</sup> As of December 24,  
26 2021, N3C has aggregated 9.4 million patients (3.3 million COVID-19 patients) with their EHR  
27 dating back from January 2018, including 1.9 million women with COVID-19 (>61k pregnant  
28 women), and 3.5 million women without COVID-19 (>209k pregnant women). The participants  
29 in N3C represent diverse populations in the U.S. (e.g., geographic, socioeconomic,  
30 racial/ethnic). Building on a secured cloud environment, N3C provides data harmonization,  
31 privacy-preserving data linkage, and high-performance data analytics. Our team has already  
32 gained access to the restricted N3C database including ZIP codes of patients and health systems  
33 and dates of services.

34  
35  
36  
37  
38  
39  
40  
41  
42  
43  
44  
45  
46  
47  
48  
49 *Nationwide social context databases*. The 2015-2019 American Community Survey (ACS)  
50 and the 2018-2020 American Hospital Association (AHA) Annual Survey will be used to  
51 calculate county-level residential segregation measures, racial discrimination in SES, and ZIP-  
52 level accessibility to hospital-based obstetric units.



1  
2  
3 *Time-varying local COVID-19 infection and social-distancing policy data.* To better  
4 understand local pandemic settings, we will also add the Centers for Disease Control and  
5 Prevention (CDC) COVID-19 Case Surveillance restricted datasets for nationwide cases  
6 confirmed since March 11, 2020, and CDC's state-level social distancing policies (e.g. emergency  
7 declaration, stay at home order, etc.) in early pandemic and telehealth services expansion data  
8 and each corresponding date of enactment.<sup>36</sup>

9  
10  
11  
12  
13  
14  
15  
16 *SC Pregnancy Risk Assessment Monitoring System (PRAMS).* SC PRAMS as a part of  
17 national PRAMS is an ongoing survey of SC mothers who have recently given birth.<sup>37</sup> These  
18 mothers are sampled from state birth certificates. After statistical weighting, PRAMS data are  
19 representative of all mothers who gave birth in SC. SC PRAMS added 11 COVID-19-related  
20 questions for mothers who delivered in August 2020 and after in their survey. SC PRAMS  
21 routinely collects detailed psychosocial and behavioral risk factors for each participant, which  
22 are not available in S3C and N3C. Residential ZIP codes will be used to add in social contextual  
23 variables and other ZIP- or county-level characteristics. The unweighted sample size for SC  
24 2018-2021 PRAMS will be at least 2,000.

### 25 26 27 28 29 30 31 32 33 34 Key Measures

35  
36  
37 *Outcome measures.* The main outcomes of interest will be SMMM.<sup>38</sup> We will adapt from a  
38 previously validated algorithm by using the International Classification of Diseases, Tenth  
39 Revision, Clinical Modification (ICD-10-CM) diagnosis and procedure codes to identify women  
40 with one or more of the 21 severe maternal morbidity (SMM) indicators developed by the CDC  
41 and updated by the Alliance for Innovation on Maternal Health (AIM) program at the time of  
42 childbirth. Maternal mortality will be identified using statewide death certificate data from the  
43 childbirth date to up to one year postpartum. A composite variable of SMMM will be created to  
44 reflect SMM or maternal mortality incidence. We will also study maternal morbidity and  
45 mortality (MMM) composite, which includes mortality and morbidities related to hypertensive  
46 disorders of pregnancy, postpartum hemorrhage, and infections/sepsis that happen during  
47  
48  
49  
50  
51  
52  
53  
54  
55  
56  
57  
58  
59  
60

1  
2  
3 pregnancy through 6 weeks postpartum.<sup>39</sup> Other outcomes to be studied include: 1) adverse  
4 maternal outcomes including intensive care unit (ICU) admission, invasive ventilation, receipt  
5 of extracorporeal membrane oxygenation (ECMO), etc.; 2) prolonged length of stay (LOS),<sup>40,41</sup>  
6 and 3) hypertension, pulmonary embolism, type 2 diabetes, cardiovascular diseases (e.g. heart  
7 attack, myocardia infraction, thrombus, stroke) diagnosed within one year after delivery.  
8  
9

10  
11  
12  
13 *COVID-19 status and severity.* Eligible COVID-19 cases are those with a positive test for  
14 SARS-CoV-2 since March 11, 2020, during pregnancy. Data on symptom status (symptomatic,  
15 asymptomatic, unknown) is available, while severity will be defined using the World Health  
16 Organization's (WHO) Clinical Progression Scale.<sup>42</sup>  
17  
18

19  
20  
21 *Social context measures.* The five dimensions of county-level *residential segregation*,  
22 including evenness, exposure, concentration, centralization, and clustering,<sup>43,44</sup> will be  
23 determined for each race/ethnic group (e.g., Black, Hispanic) using the ACS Census tract  
24 data.<sup>45,46</sup> Each index will be calculated across census tracts within residential counties. Higher  
25 values indicate higher levels of segregation. We will create the group indicator for segregated  
26 versus less segregated counties using the cutoffs for each dimension index.<sup>46</sup> Additional hyper-  
27 segregation index – segregations scores at  $\geq 0.6$  on at least four aforementioned dimensions –  
28 will be created to reflect the highest levels of segregation.<sup>46</sup> Within-county *racial/ethnic*  
29 *discrimination in SES* will be calculated using the ACS county data,<sup>45</sup> including Black-White and  
30 Hispanic-White ratios of poverty, unemployment, and home ownership rates.<sup>47-51</sup> These  
31 measures will be linked to databases via maternal residence counties.  
32  
33  
34  
35  
36  
37  
38  
39  
40  
41  
42  
43

44  
45 *Healthcare institution.* Using the AHA annual survey data on hospital location,<sup>52</sup> we will  
46 identify *loss of hospital-based obstetric units* using our published validated algorithm.<sup>53-55</sup> An  
47 indicator for whether a hospital or a hospital's obstetric service was closed for each year will be  
48 created. In turn, women's access to hospital-based obstetric care within 30-mile distance for  
49 years 2018-2020 using the ArcGIS fastest route network will be determined: 1) had access to; 2)  
50 no access to; and 3) experienced the loss of all hospital-based obstetric units.  
51  
52  
53  
54  
55  
56  
57  
58  
59  
60

1  
2  
3 *County-level COVID-19 infections and social distancing policies.* The CDC's COVID-19 Case  
4 Surveillance will be used to compute monthly cumulative rates of in-county residents that had  
5 been confirmed COVID-19 positive, hospitalized, admitted to an intensive care unit, and with  
6 mechanical ventilation (MV)/intubation as a result of COVID-19 disease. Number of months  
7 elapsed since a county had each of the following policy orders will be calculated from a delivery  
8 date: emergency declaration, closures of bars, restaurants, and/or other non-essential business,  
9 stay at home order, and telehealth services expansion.  
10  
11

### 12 Statistical Analyses

#### 13 *Impacts of the COVID-19 pandemic on racial/ethnic disparities in SMMM.*

14  
15 We will examine the overall impacts of the COVID-19 pandemic on SMMM using the data  
16 from the S3C-P and N3C. We hypothesize that: 1) compared to pre-pandemic periods, SMMM  
17 has increased during the pandemic and racial/ethnic disparities have widened during the  
18 pandemic; and 2) compared to pregnant women without COVID-19 infection, women with  
19 COVID-19 infection experienced higher proportions of SMMM, and racial/ethnic disparities in  
20 SMMM have amplified among COVID-19 infected women.  
21  
22

23  
24 First, we will examine the distributions for all measures and clean the database (e.g. outliers,  
25 data entry errors etc.) using appropriate statistical techniques. Second, we will conduct  
26 preliminary analyses and examine descriptive statistics for outcome measures. Unadjusted and  
27 adjusted associations of SMMM with key variables and covariates will be assessed using  
28 appropriate statistical procedures (e.g., tests of proportions, chi-square tests, analysis of  
29 variance).  
30  
31

32  
33 Women who gave birth between January 1, 2018 through March 10, 2020, will be  
34 categorized as before pandemic, while women who gave birth between March 11, 2020 through  
35 December 31, 2021, will be considered as during the pandemic. The pre-pandemic vs pandemic  
36 impact on SMMM will be modeled via logistic regression. First, the crude model with the  
37 pandemic indicator only will address SMMM change before and after the pandemic. Second, to  
38  
39  
40  
41  
42  
43  
44  
45  
46  
47  
48  
49  
50  
51  
52  
53  
54  
55  
56  
57  
58  
59  
60

1  
2  
3 investigate whether racial/ethnic disparities in SMMM have widened during the pandemic, the  
4 crude model will be further adjusted with race/ethnicity, interactions between race/ethnicity  
5 and pandemic indicator, and months elapsed since March 11, 2020, on delivery dates. Then  
6 additional variables will be added, including individual-level characteristics (e.g., age, SES proxy  
7 [i.e., Medicaid/uninsured status], parity, marital status, underlying health conditions). Variable  
8 selection and goodness of model fit will be evaluated using the AIC, BIC, and likelihood ratio  
9 test.  
10  
11  
12  
13  
14  
15  
16

17 We will also conduct analyses in women who delivered during the COVID-19 pandemic by  
18 comparing pregnant women with and without COVID-19 infection. We will first create the  
19 COVID infection indicator and then will perform the similar analysis as those for the pre-  
20 pandemic vs pandemic impact. We will further adjust for county-level COVID-19 infections per  
21 capita and social distancing policies at the appropriate time points using logistic regressions  
22 with random effects accounting for correlations among counties.  
23  
24  
25  
26  
27  
28  
29

30 *Social contexts, racial/ethnic disparities in SMMM, and distinct mediating pathways.*  
31

32 We will study these issues using different databases and methods. First, we will examine the  
33 association between social contexts and changes in racial/ethnic disparities in SMMM before  
34 and during the pandemic. We hypothesize that racial/ethnic disparities SMMM are potentially  
35 disproportionately widened in communities with higher racial/ethnic economic disparities  
36 (measured by Black-White ratios of economic disadvantages, Hispanic-White ratios of economic  
37 disadvantages) and in higher vs. less segregated Black or Hispanic counties (measured by  
38 residential segregation). We will conduct a parallel analysis between social contexts and SMMM  
39 using the data from S3C-P and N3C (**Figure 2**). Similarly, we will examine the contributing  
40 roles of social contexts to racial/ethnic disparities in SMMM in the overall sample (pre-  
41 pandemic vs pandemic) and between COVID-19 positive vs COVID-19 negative women. The  
42 multilevel variables that will be investigated include individual-level characteristics,  
43 community-level characteristics (ZIP code accessibility of hospital obstetric units), and county-  
44  
45  
46  
47  
48  
49  
50  
51  
52  
53  
54  
55  
56  
57  
58  
59  
60

1  
2  
3 level characteristic (social contexts: residential segregation and racial discrimination on SES;  
4 COVID-19 infection per capita and social distancing policies). For exploratory analysis, the odds  
5 ratio (OR) of SMMM among Black and White and the social context level at the county level pre-  
6 pandemic vs pandemic will be visualized via the spatial temporal map using GIS. The summary  
7 statistics in SMMM with respect to race/ethnicity will be calculated according to individual- and  
8 county-level characteristic.  
9

10  
11 We will model SMMM via multilevel hierarchical logistic regression. Women who reside at  
12 the same community- or county-level will be accounted for via random effects, which will be  
13 further modeled in the regression model with a multivariate normal distribution to account for  
14 the correlations among community or county. We plan to use an incremental modeling strategy:  
15 1) crude model (race/ethnicity and social context factors); 2) adjusting for individual level  
16 factors; and 3) additional adjustment of additional community- and county-levels  
17 characteristics. For N3C data, we will further adjust for state or Census region. To further  
18 examine whether social contexts moderate racial/ethnic disparities in SMMM and whether  
19 these disparities vary between pre-pandemic and pandemic, we will include two-way and three-  
20 way interaction terms in the model (e.g., pandemic period\*social context\*race). To examine the  
21 added impact of COVID-19 infections on SMMM, we will repeat the model by restricting it to all  
22 women who gave birth during pandemic period (delivered after March 11, 2020) and including  
23 maternal COVID-19 severity status in the model. Models will be compared using the AIC and  
24 BIC criteria. In the modelling procedure, the outliers, missingness, multicollinearity, and  
25 nonlinear will be addressed accordingly, and sensitivity analysis will be conducted comparing  
26 models with or without the treatment of outliers or missing data. The magnitude and direction  
27 racial/ethnic disparities will be assessed through OR and its 95% confidence interval.  
28

29  
30 Second, we will use a convergent parallel design to evaluate the underlying pathways  
31 between social contexts and racial/ethnic disparities in MMM via pandemic stressors, maternity  
32 care (prenatal and postpartum) and mental health condition. We hypothesize that social  
33  
34  
35  
36  
37  
38  
39  
40  
41  
42  
43  
44  
45  
46  
47  
48  
49  
50  
51  
52  
53  
54  
55  
56  
57  
58  
59  
60

1  
2  
3 contexts might hinder maternity care and worsen mental health conditions among Black and  
4  
5 Hispanic women during the pandemic and exacerbate racial/ethnic disparities in MMM.  
6

7       The quantitative analysis will be conducted using SC PRAMS data, which have unique data  
8  
9 elements that are not available in S3C-P and N3C. The 2018-2021 SC PRAMS data will provide a  
10  
11 more refined understanding of COVID-19 stressors, psychosocial stress, and healthcare  
12  
13 utilization through the questionnaire, including pandemic stressors (financial, job loss,  
14  
15 childcare, etc.), individual mitigation practices, changes in prenatal and postpartum care,  
16  
17 psychosocial stress, barriers to health services, intimate partner violence (IPV), prenatal and  
18  
19 postpartum care utilization, smoking, alcohol use, gestational weight gain, and mental health.  
20  
21 SC PRAMS asks respondents to assess how often they experienced depressive symptoms after  
22  
23 delivery. Descriptive statistics will be used to examine pandemic-related changes in MMM and  
24  
25 psychosocial and behavioral changes between pre-pandemic (delivered before March 11, 2020)  
26  
27 and pandemic periods (March 11, 2020 and after). The weighted hierarchical regression model  
28  
29 will be applied to examine the association between social context and MMM. As previously  
30  
31 mentioned, community and county levels will also be modeled in the regression. Different from  
32  
33 the prior analyses above: 1) individual characteristics will mainly come from PRAMS or birth  
34  
35 certificates; 2) the weight based on complex survey design will be modeled; and 3) individual  
36  
37 reports of healthcare utilization and mental health condition included.  
38  
39

40       We will conduct in-depth interviews among 40 postpartum women of color (~20 African  
41  
42 American; ~20 Hispanic) stratified by COVID-19 infection status and 10 maternal care  
43  
44 providers (MCPs) who serve pregnant and postpartum women in Black and Latino  
45  
46 communities. The inclusion criteria of postpartum women include: 1)  $\geq 18$  years old; 2) either  
47  
48 African American or Hispanic; 3) have given birth in 2021; and 4) living in SC. We will  
49  
50 purposely recruit postpartum women and MCPs through local OBGYN clinics and community  
51  
52 health organizations that serve a larger proportion of low-income Black and Hispanic women.  
53  
54 We will train female interviewers of the same race as the interviewees to obtain trust from the  
55  
56  
57  
58  
59  
60

1  
2  
3 postpartum women participants, and interviews in Spanish will be conducted as needed. Guided  
4  
5 by the conceptual framework, the main topics of the postpartum women interviews will include:  
6  
7 1) their perceptions toward their healthcare providers and institutions for perinatal care; 2)  
8  
9 experience with prenatal and postpartum care; 3) stressors in the COVID-19 pandemic; 4)  
10  
11 challenges in healthcare seeking (e.g., appointments, clinic visits), especially from structural  
12  
13 factors (racism and discrimination); and 5) their needs/recommendations for future healthcare.  
14  
15 The main topics of the MCPs include: 1) stressors and challenges of their clients; 2) clients'  
16  
17 mental health conditions; 3) impacts of COVID-19 on their care provision; and 4) their views on  
18  
19 health disparities caused by structural factors. The interviews will last 50 minutes and will be  
20  
21 recorded with each participant's consent. Audio recordings will be transcribed and coded using  
22  
23 NVivo 11.0. We will employ thematic analyses.<sup>56</sup> The findings will complement the quantitative  
24  
25 data in providing a comprehensive picture on how COVID-19 affects psychosocial well-being of  
26  
27 the postpartum women of color; offer in-depth interpretation and explanation of quantitative  
28  
29 results; and explore the mediating pathways in which structural factors amplify existing  
30  
31 disparities in maternal health in the context of the pandemic.

#### 32 33 34 *Machine learning-based predictive models.*

35  
36 We will develop and evaluate machine learning-based predictive models to identify risk  
37  
38 factors of SMMM and forecast progression of hypertensive disorder, pulmonary conditions, type  
39  
40 2 diabetes mellitus, and cardiovascular diseases among postpartum women. The predictive  
41  
42 models will synthesize individuals' demographics, EHR, social contextual factors, and  
43  
44 community and healthcare system level data to make predictions of individuals' clinical  
45  
46 outcomes at key time points. Because data sources suggestive of these factors are variable and  
47  
48 high-dimensional, and these factors are inherently interconnected over time,<sup>57</sup> machine learning  
49  
50 is a superior approach to predicting clinical outcomes and proactively detecting the associated  
51  
52 risk factors for early intervention and treatment. Constructed models will demonstrate critical  
53  
54 factors predictive of clinical outcomes and how these factors interact over time.  
55  
56  
57  
58  
59  
60

1  
2  
3 Supervised machine learning algorithm will be adopted for the predictive models. Using  
4 N3C, the algorithm will learn from input variables and predict SMMM and long-standing  
5 morbidities (e.g., hypertension, pulmonary embolism, diabetes, cardiovascular diseases) over  
6 time. Input variables will include maternal characteristics, e.g., socio-demographics, socio-  
7 behavioral data, social context variables, diagnoses, procedures, laboratory tests, and  
8 medications. The prediction of SMMM and long-standing morbidities will take place at critical  
9 time points: <3, 6, 12 weeks, 6 and 12 months postpartum.<sup>58</sup> We will develop Deep Learning  
10 algorithms because of their ability to integrate complex clinical data and social contexts from  
11 multiple sources with superior predictive performance, including: 1) convolutional neural  
12 network (CNN) for its ability to capture dynamic patterns among multilevel input variables; 2)  
13 recurrent neural network (RNN) with long short-term memory (LSTM) architecture for its  
14 ability of capturing temporal patterns of clinical events (e.g., onset of pre-infection conditions,  
15 viral infections and clinical events marked with gestational weeks, and the date of childbirths);  
16 and 3) Deep Boltzmann Machine (DBM) for its interpretable scoring mechanism for risk  
17 prediction.<sup>59</sup>

18  
19 We will use a 10-fold cross validation. Specifically, S3C and N3C data will each be randomly  
20 partitioned into ten splits. In each of the ten iterations, seven splits of data will be randomly  
21 selected for model training, two splits of data will be used for internal validation (finetuning  
22 hyperparameters), and the 10th split used for testing. We will use F measure, precision, recall,  
23 and the area under the Receiver Operating Characteristic curve (AUC), if unbalanced data, to  
24 measure the predictive performance of models. We will use support vector machine (SVM) as  
25 the baseline algorithm to compare against the performance of CNN, RNN (LSTM), and DBM.  
26 The best-performed model will be identified based on F measure.

27  
28 We will rank input variables and/or clusters of input variables by calculating the importance  
29 scores <sup>57</sup> (e.g., mutual information, SVM-based recursive linear elimination). Two content co-  
30 investigators will independently review the ranked results and identify clinical/social risk



1  
2  
3 factors. Disagreement between two reviewers will be resolved by panel discussion. Development  
4 of sophisticated machine learning models for predicting long-standing morbidities will be used  
5 to identify important risk factors prenatally, which can be used for early intervention, treatment,  
6 and community-wide interventions.  
7  
8  
9

10  
11 *Power and Sample Size Calculation.* We estimate that there were 200,000 women who gave  
12 birth in S3C and 270,000 pregnant women in N3C for our study period. The primary outcome of  
13 interest is SMM and the main exposures of interest are race (White vs Black) and pre-peri  
14 COVID period. We assume that there are 64,000 (32%) Black and 114,000 (57%) White in S3C<sup>60</sup>  
15 and 38,070(14.1%) Black and 160,380 (59.4%) White in N3C.<sup>61</sup> We also assume that with the  
16 same time length of pre and peri COVID-19, the prevalence of pregnancy will be similar (50%).  
17 For all aims, we consider the logistic regression with mixed effects. Based on 1.5%-2.5%  
18 incidence of SMM with 20%-50% increase due to the COVID -19 impact or race disparities, we  
19 conduct the power analysis based on the logistic regression using SAS and conclude that  
20 200,000 sample size will be adequate to reach the power around 90%. **Figure 3** illustrates the  
21 relationship of power and odds ratio with setting of n=200,000, significance at 0.05, variable of  
22 interest with a ratio of 10:90. This will be the basic model considered, and it indicates strong  
23 power for the prediction model.  
24  
25  
26  
27  
28  
29

### 30 Current status and anticipated timeline

31  
32 As of April 2022, we have received the linked core databases for the S3C cohort for the  
33 period of January 2018- June 2021 and full datasets will be available by the Fall of 2022. Our  
34 team is also actively constructing N3C analytic data of women with childbirths during January  
35 2018-December 2021 for statistical analysis and machine learning. Furthermore, our team is  
36 conducting in-depth interviews with our targeted populations according to our protocols  
37 described here. We anticipate completing our main analyses in May 2023.  
38  
39

### 40 Patient and Public Involvement

1  
2  
3 No patient involvement in the design, conduct and reporting of our research. We will  
4 actively reach out patients and public in the dissemination of our findings.  
5  
6

### 7 Ethics and dissemination

8

9 The study was approved by institutional review boards at the University of South  
10 Carolina (Pro00115169) and the South Carolina Department of Health and Environmental  
11 Control (DHEC IRB.21-030). Informed consent will be completed for the participants to be  
12 enrolled in the in-depth interviews. Furthermore, the NIH's N3C data access committee  
13 approved the data use request for this project (RP-2B9622). Study findings will be disseminated  
14 with key stakeholders including patients, presented at academic conferences, and published in  
15 peer-reviewed journals.  
16  
17  
18  
19  
20  
21  
22  
23  
24  
25

## 26 **DISCUSSION**

27

28 The COVID-19 pandemic has led to unprecedented societal disruptions to individuals,  
29 communities, healthcare institutions, and society. Empirical data on the scope of possible  
30 widening racial/ethnic disparities in SMMM during the COVID-19 pandemic and how historical  
31 structural racism and discrimination of all types have impacted women of color  
32 disproportionately are sparse. This study will be among the first efforts to investigate whether the  
33 COVID-19 pandemic, structural racism, and racial discrimination— exposures with broad scale  
34 and reach – have contributed to the racial/ethnic disparities in SMMM in the context of the  
35 COVID-19 pandemic. Second, this proposed study employs a state-of-the-art design (i.e., a  
36 convergent parallel design) to comprehensively examine the impacts of structural racism and  
37 discrimination on maternal health and the complex pathways between multilevel determinants.  
38 This design has the advantage of allowing us to weigh both quantitative and qualitative methods  
39 equally and interpret the results together.<sup>62</sup> Third, the proposed study will innovatively use  
40 machine learning models to predict SMMM and chronic morbidities up to one year after  
41 delivery in the context of the COVID-19 pandemic. Fourth, we propose a large-scale population-  
42  
43  
44  
45  
46  
47  
48  
49  
50  
51  
52  
53  
54  
55  
56  
57  
58  
59  
60

1  
2  
3 based cohort study concurrently for both SC and the U.S., which will innovatively integrate  
4 COVID-19-related clinical, surveillance, EHR, and geospatial data at community, healthcare  
5 institutions, and system/policy levels. These newly integrated data sources will allow us to  
6 examine multilevel determinants of maternal health during the pandemic and advance the  
7 investigation on racial/ethnic disparities in long-standing complications post-pandemic. In  
8 brief, this research represents a significant and innovative contribution to the research on the  
9 unacceptable racial/ethnic disparities in SMMM during pregnancy and postpartum in the  
10 context of COVID-19. By focusing on social contextual factors (e.g., structural racism), we seek  
11 to identify ways in which the largest number of women may be impacted by targeted programs  
12 and policies aiming to alter the context in which these morbidities and mortality occur.

13  
14  
15  
16  
17  
18  
19  
20  
21  
22  
23  
24 This study also has some limitations. First, it is possible that the county-level social contexts'  
25 effects in our data may not be significant. If that happens, we will calculate ZIP-code level social  
26 contexts. By assessing racial segregations, spatial distribution of economic disadvantage  
27 communities within a residence county and within-community racial discrimination, this study  
28 will provide evidence on the associations between distinct social contexts and maternal health  
29 disparities. Second, considering some women may move during pregnancy, the stagnant  
30 residential social contexts might not reflect their long-term exposures to neighborhood  
31 structural racism. Furthermore, in the case of inferior F measures ( $<0.7$ ) of learning predictive  
32 models, we will apply feature selection algorithms and association rules in model training to  
33 maximize performance.

34  
35  
36  
37  
38  
39  
40  
41  
42  
43  
44  
45 In conclusion, the rising SMMM rate and persistent racial/ethnic disparities should trigger  
46 public health concerns, not only due to the immediate burden faced by vulnerable women, but  
47 also due to potentially lasting effects on women's health over a life course or along family lines  
48 across generations.<sup>63</sup> This study will investigate racial/ethnic disparities in SMMM, the  
49 contributing roles and mediating pathways of social contexts (e.g., structural racism, racial  
50 discrimination), and the long-standing health consequences of the pandemic by studying the  
51  
52  
53  
54  
55  
56  
57  
58  
59  
60

1  
2  
3 distributions of COVID-19 cases and multilevel determinants of maternal health in a racially,  
4 socioeconomically, and geographically diverse population of U.S. pregnant women. A rigorous  
5 examination of social contexts and racial/ethnic disparities in SMMM during the pandemic will  
6 contribute to the identification of factors with a broad scale and reach for programmatic and  
7 policy interventions to alter the context in which morbidity and mortality occur. Our findings  
8 will inform continuing efforts to reverse the rising trends of SMMM in the U.S.  
9  
10  
11  
12  
13  
14  
15  
16  
17  
18  
19  
20  
21  
22  
23  
24  
25  
26  
27  
28  
29  
30  
31  
32  
33  
34  
35  
36  
37  
38  
39  
40  
41  
42  
43  
44  
45  
46  
47  
48  
49  
50  
51  
52  
53  
54  
55  
56  
57  
58  
59  
60

For peer review only

**List of abbreviations**

ACS: American Community Survey

AHA: American Hospital Association

AIM: Alliance for Innovation on Maternal Health program

AUC: Receiver Operating Characteristic Curve

Black: Non-Hispanic Black

BMI: Body Mass Index

CDC: Centers for Disease Control and Prevention

CDM: Clinical Data Model

CNN: Convolutional Neural Network

DBM: Deep Boltzmann Machine

ECMO: Extracorporeal Membrane Oxygenation

EHR: Electronic Health Records

ICU: Intensive Care Unit

ICD-10-CM: the International Classification of Diseases, Tenth Revision, Clinical Modification

IMPROVE: Implementing a Maternal health and PRegnancy Outcomes Vision for Everyone

IPV: Intimate Partner Violence

IRB: Institutional Review Board

LOS: Prolonged Length of Stay

LSTM: Long Short-Term Memory

MCPs: Maternal Care Providers

MMM: Maternal Morbidity and Mortality

MUSC: Medical University of South Carolina

MV: Mechanical Ventilation

N3C: National COVID Cohort Collaborative

NCATS: the National Center for Advancing Translational Sciences

1  
2  
3 NIAID: National Institute of Allergy and Infectious Disease  
4  
5 NIH: National Institutes of Health  
6  
7 OMOP: Observational Medical Outcomes Partnership  
8  
9 OR: Odds Ratio  
10  
11 PRAMS: Pregnancy Risk Assessment and Monitoring System  
12  
13 RNN: Recurrent Neural Network  
14  
15 S3C: South Carolina COVID-19 Cohort  
16  
17 S3C-P: South Carolina COVID-19 Cohort-Pregnancy  
18  
19 SC: South Carolina  
20  
21 SC DHEC: SC Department of Health and Environmental Control  
22  
23 SC DMH: South Carolina Department of Mental Health  
24  
25 SC RFA: SC Office of Revenue and Fiscal Affairs  
26  
27  
28 SES: Socioeconomic Status  
29  
30 SMM: Severe Maternal Morbidity  
31  
32 SMMM: Severe Maternal Morbidity and Mortality  
33  
34 SVM: Support Vector Machine  
35  
36 UofSC: University of South Carolina  
37  
38 White: Non-Hispanic White  
39  
40 WHO: World Health Organization  
41  
42  
43  
44  
45  
46  
47  
48  
49  
50  
51  
52  
53  
54  
55  
56  
57  
58  
59  
60

## Declarations

### *Consent for publication*

Not applicable.

### *Availability of data and materials*

The South Carolina data (S3C) that were analyzed to produce the findings of this study are available from the SC Office of Revenue and Fiscal Affairs (RFA) upon reasonable request. Per our contract with SC RFA, only approved users have access to the data and data cannot be made publicly available by authors. N3C data can be accessed through the NCATS N3C Data Enclave for approved users (<https://covid.cd2h.org>).

### *Author's contributions*

JL conceptualized and designed the study and wrote the first draft. PH, CL, JZ, SQ and XL participated in writing sections of the original proposal. All authors critically reviewed and edited the manuscript and had final responsibility for the decision to submit for publication.

### *Funding*

Research reported in this publication was supported by the National Institute of Allergy And Infectious Diseases and Office of the Director of the National Institutes of Health under Award Number 3R01AI127203-5S2 for Implementing a Maternal health and PRenancy Outcomes Vision for Everyone (IMPROVE). Li and Liu are the MPIs for this study. The funder had no role in the design of this study and will not have any role during its execution, analyses, interpretation of the data, or decision to submit results.

### *Competing interests*

The authors declare that they have no completing interests.

### *Acknowledgements*

The authors thank SC Department of Health and Environmental Control, SC Revenue and Fiscal Affairs office, and other SC agencies for contributing the data in South Carolina. The authors also want to thank the organizations (<https://ncats.nih.gov/n3c/resources/data->

1  
2  
3 contribution/data-transfer-agreement-signatories) and scientists who have contributed to the  
4 on-going development of N3C database [<https://doi.org/10.1093/jamia/ocaa196>].  
5  
6  
7  
8  
9  
10  
11  
12  
13  
14  
15  
16  
17  
18  
19  
20  
21  
22  
23  
24  
25  
26  
27  
28  
29  
30  
31  
32  
33  
34  
35  
36  
37  
38  
39  
40  
41  
42  
43  
44  
45  
46  
47  
48  
49  
50  
51  
52  
53  
54  
55  
56  
57  
58  
59  
60

For peer review only



## References

1. Creanga AA, Berg CJ, Ko JY, Farr SL, Tong VT, Bruce FC, et al. Maternal mortality and morbidity in the United States: where are we now? *J Womens Health (Larchmt)*. 2014;23(1):3-9.
2. Centers for Disease Control and Prevention. Infographic: Racial/Ethnic Disparities in Pregnancy-Related Deaths - United States, 2007-2016. <https://www.cdc.gov/reproductivehealth/maternal-mortality/disparities-pregnancy-related-deaths/infographic.html>. Accessed April 5, 2021.
3. Centers for Disease Control and Prevention. Rates in Severe Morbidity Indicators per 10,000 Delivery Hospitalizations, 1993-2014. <https://www.cdc.gov/reproductivehealth/maternalinfanthealth/smm/rates-severe-morbidity-indicator.htm>. Accessed April 5, 2021.
4. Centers for Disease Control and Prevention. Maternal Mortality. <https://www.cdc.gov/reproductivehealth/maternal-mortality/index.html>. Accessed March 27, 2021.
5. Centers for Disease Control and Prevention. Pregnancy Complications. *Reproductive Health* <https://www.cdc.gov/reproductivehealth/maternalinfanthealth/pregnancy-complications.html>. Accessed April 5, 2021.
6. National Public Radio. Nearly dying in childbirth: why preventable complications are growing in the US. 2017; <https://www.npr.org/2017/12/22/572298802/nearly-dying-in-childbirth-why-preventable-complications-are-growing-in-u-s>. Accessed April 5, 2021.
7. Vesco KK, Ferrante S, Chen Y, Rhodes T, Black CM, Allen-Ramey F. Costs of Severe Maternal Morbidity During Pregnancy in US Commercially Insured and Medicaid Populations: An Observational Study. *Matern Child Health J*. 2020;24(1):30-38.
8. Hao J, Hassen D, Hao Q, Graham J, Paglia MJ, Brown J, et al. Maternal and Infant Health Care Costs Related to Preeclampsia. *Obstet Gynecol*. 2019;134(6):1227-1233.

- 1  
2  
3 9. Admon LK, Winkelman TNA, Zivin K, Terplan M, Mhyre JM, Dalton VK. Racial and  
4  
5 Ethnic Disparities in the Incidence of Severe Maternal Morbidity in the United States,  
6  
7 2012-2015. *Obstet Gynecol.* 2018;132(5):1158-1166.  
8
- 9  
10 10. Declercq E, Zephyrin L. Maternal Mortality in the United States: A Primer. *The*  
11  
12 *Commonwealth Fund, Data Brief* 2020;  
13  
14 [https://www.commonwealthfund.org/publications/issue-brief-](https://www.commonwealthfund.org/publications/issue-brief-report/2020/dec/maternal-mortality-united-states-primer)  
15  
16 [report/2020/dec/maternal-mortality-united-states-primer](https://www.commonwealthfund.org/publications/issue-brief-report/2020/dec/maternal-mortality-united-states-primer). Accessed March 27, 2021.  
17
- 18 11. Fingar KR, Hambrick MM, Heslin KC, Moore JE. Trends and Disparities in Delivery  
19  
20 Hospitalizations Involving Severe Maternal Morbidity, 2006-2015: Statistical Brief  
21  
22 #243. *Healthcare Cost and Utilization Project (HCUP) Statistical Briefs*. Rockville  
23  
24 (MD)2018.  
25
- 26 12. Wang E, Glazer KB, Howell EA, Janevic TM. Social Determinants of Pregnancy-Related  
27  
28 Mortality and Morbidity in the United States: A Systematic Review. *Obstet Gynecol.*  
29  
30 2020;135(4):896-915.  
31
- 32 13. Howell EA, Egorova NN, Janevic T, Brodman M, Balbierz A, Zeitlin J, et al. Race and  
33  
34 Ethnicity, Medical Insurance, and Within-Hospital Severe Maternal Morbidity  
35  
36 Disparities. *Obstet Gynecol.* 2020;135(2):285-293.  
37
- 38 14. Chen J, Cox S, Kuklina EV, Ferre C, Barfield W, Li R. Assessment of Incidence and  
39  
40 Factors Associated With Severe Maternal Morbidity After Delivery Discharge Among  
41  
42 Women in the US. *JAMA Netw Open.* 2021;4(2):e2036148.  
43  
44
- 45 15. Gold JAW, Rossen LM, Ahmad FB, Sutton P, Li Z, Salvatore PP, et al. Race, Ethnicity,  
46  
47 and Age Trends in Persons Who Died from COVID-19 - United States, May-August 2020.  
48  
49 *MMWR Morb Mortal Wkly Rep.* 2020;69(42):1517-1521.  
50
- 51 16. Emeruwa UN, Spiegelman J, Ona S, Kahe K, Miller RS, Fuchs KM, et al. Influence of  
52  
53 Race and Ethnicity on Severe Acute Respiratory Syndrome Coronavirus 2 (SARS-CoV-2)  
54  
55  
56  
57  
58  
59  
60

- 1  
2  
3 Infection Rates and Clinical Outcomes in Pregnancy. *Obstet Gynecol.* 2020;136(5):1040-  
4 1043.  
5  
6  
7 17. Grechukhina O, Greenberg V, Lundsberg LS, Deshmukh U, Cate J, Lipkind HS, et al.  
8 Coronavirus disease 2019 pregnancy outcomes in a racially and ethnically diverse  
9 population. *Am J Obstet Gynecol MFM.* 2020;2(4):100246.  
10  
11  
12 18. Ellington S, Strid P, Tong VT, Woodworth K, Galang RR, Zambrano LD, et al.  
13 Characteristics of Women of Reproductive Age with Laboratory-Confirmed SARS-CoV-2  
14 Infection by Pregnancy Status - United States, January 22-June 7, 2020. *MMWR Morb*  
15 *Mortal Wkly Rep.* 2020;69(25):769-775.  
16  
17  
18 19. Zambrano LD, Ellington S, Strid P, Galang RR, Oduyebo T, Tong VT, et al. Update:  
19 Characteristics of Symptomatic Women of Reproductive Age with Laboratory-Confirmed  
20 SARS-CoV-2 Infection by Pregnancy Status - United States, January 22-October 3, 2020.  
21 *MMWR Morb Mortal Wkly Rep.* 2020;69(44):1641-1647.  
22  
23  
24 20. Moore JT, Ricaldi JN, Rose CE, Fuld J, Parise M, Kang GJ, et al. Disparities in Incidence  
25 of COVID-19 Among Underrepresented Racial/Ethnic Groups in Counties Identified as  
26 Hotspots During June 5-18, 2020 - 22 States, February-June 2020. *MMWR Morb*  
27 *Mortal Wkly Rep.* 2020;69(33):1122-1126.  
28  
29  
30 21. National Public Radio. The Impact of Coronavirus on Households in Major U.S. Cities.  
31 2020; <https://media.npr.org/assets/img/2020/09/08/cities-report-090920-final.pdf>.  
32 Accessed April 5, 2021.  
33  
34  
35 22. McCloskey L, Amutah-Onukagha N, Bernstein J, Handler A. Setting the Agenda for  
36 Reproductive and Maternal Health in the Era of COVID-19: Lessons from a Cruel and  
37 Radical Teacher. *Matern Child Health J.* 2021;25(2):181-191.  
38  
39  
40 23. Onwuzurike C, Meadows AR, Nour NM. Examining Inequities Associated With Changes  
41 in Obstetric and Gynecologic Care Delivery During the Coronavirus Disease 2019  
42 (COVID-19) Pandemic. *Obstet Gynecol.* 2020;136(1):37-41.  
43  
44  
45  
46  
47  
48  
49  
50  
51  
52  
53  
54  
55  
56  
57  
58  
59  
60

- 1  
2  
3  
4  
5  
6  
7  
8  
9  
10  
11  
12  
13  
14  
15  
16  
17  
18  
19  
20  
21  
22  
23  
24  
25  
26  
27  
28  
29  
30  
31  
32  
33  
34  
35  
36  
37  
38  
39  
40  
41  
42  
43  
44  
45  
46  
47  
48  
49  
50  
51  
52  
53  
54  
55  
56  
57  
58  
59  
60
24. Howell EA. Reducing Disparities in Severe Maternal Morbidity and Mortality. *Clin Obstet Gynecol*. 2018;61(2):387-399.
  25. Westgren M, Pettersson K, Hagberg H, Acharya G. Severe maternal morbidity and mortality associated with COVID-19: The risk should not be downplayed. *Acta Obstet Gynecol Scand*. 2020;99(7):815-816.
  26. Allen EH, Benatar S. Maternity Care Financing: Challenges and Opportunities Highlighted by the COVID-19 Pandemic. Robert Wood Johnson Foundation; The Urban Institute; 2020.
  27. Statista. Rate of coronavirus (COVID-19) cases in the United States as of December 16, 2021, by state(per 100,000 people). <https://www.statista.com/statistics/1109004/coronavirus-covid19-cases-rate-us-americans-by-state/>. Accessed December 23, 2021.
  28. National Center for Health Statistics. Maternal Mortality by State, 2018. 2018; <https://www.cdc.gov/nchs/maternal-mortality/MMR-2018-State-Data-508.pdf>. Accessed March 27, 2021.
  29. Kaiser Family Foundation. Number of Births By Race. 2018; <https://www.kff.org/other/state-indicator/births-by-raceethnicity/?dataView=1&currentTimeframe=0&sortModel=%7B%22colId%22:%22Block%22,%22sort%22:%22desc%22%7D>. Accessed March 27, 2021.
  30. South Carolina State House. South Carolina Maternal Morbidity and Mortality Review Committee. Legislative Brief March 2020. 2020; <https://www.scstatehouse.gov/reports/DHEC/mmmr-2020-Final.pdf>. Accessed April 2, 2021.
  31. South Carolina Department of Health and Environmental Control. Health Professional Shortage Area (HPSA). <https://scdhec.gov/health-professionals/health-professional-shortage-area-hpsa>.

- 1  
2  
3 32. Leonard SA, Main EK, Scott KA, Profit J, Carmichael SL. Racial and ethnic disparities in  
4 severe maternal morbidity prevalence and trends. *Ann Epidemiol.* 2019;33:30-36.  
5  
6  
7 33. Leonard SA, Kennedy CJ, Carmichael SL, Lyell DJ, Main EK. An Expanded Obstetric  
8 Comorbidity Scoring System for Predicting Severe Maternal Morbidity. *Obstet Gynecol.*  
9 2020;136(3):440-449.  
10  
11  
12  
13 34. Haendel MA, Chute CG, Bennett TD, Eichmann DA, Guinney J, Kibbe WA, et al. The  
14 National COVID Cohort Collaborative (N3C): Rationale, design, infrastructure, and  
15 deployment. *J Am Med Inform Assoc.* 2021;28(3):427-443.  
16  
17  
18  
19 35. Olatosi B, Zhang J, Weissman S, Hu J, Haider MR, Li X. Using big data analytics to  
20 improve HIV medical care utilisation in South Carolina: A study protocol. *BMJ Open.*  
21 2019;9(7):e027688.  
22  
23  
24  
25 36. Centers for Disease Control and Prevention. U.S. State and Territorial Gathering Bans:  
26 March 11-December 31, 2020 by County by Day. 2021;  
27 [https://catalog.data.gov/dataset/u-s-state-and-territorial-gathering-bans-march-11-](https://catalog.data.gov/dataset/u-s-state-and-territorial-gathering-bans-march-11-december-31-2020-by-county-by-day-79295)  
28 [december-31-2020-by-county-by-day-79295](https://catalog.data.gov/dataset/u-s-state-and-territorial-gathering-bans-march-11-december-31-2020-by-county-by-day-79295). Accessed April 3, 2021.  
29  
30  
31  
32 37. Shulman HB, D'Angelo DV, Harrison L, Smith RA, Warner L. The Pregnancy Risk  
33 Assessment Monitoring System (PRAMS): Overview of Design and Methodology. *Am J*  
34 *Public Health.* 2018;108(10):1305-1313.  
35  
36  
37  
38 38. Centers for Disease Control and Prevention. How Does CDC Identify Severe Maternal  
39 Mortality?  
40 [https://www.cdc.gov/reproductivehealth/maternalinfanthealth/smm/severe-morbidity-](https://www.cdc.gov/reproductivehealth/maternalinfanthealth/smm/severe-morbidity-ICD.htm)  
41 [ICD.htm](https://www.cdc.gov/reproductivehealth/maternalinfanthealth/smm/severe-morbidity-ICD.htm). Accessed April 3, 2021.  
42  
43  
44  
45 39. Chakhtoura N, Chinn JJ, Grantz KL, Eisenberg E, Artis Dickerson S, Lamar C, et al.  
46 Importance of research in reducing maternal morbidity and mortality rates. *Am J Obstet*  
47 *Gynecol.* 2019;221(3):179-182.  
48  
49  
50  
51  
52  
53  
54  
55  
56  
57  
58  
59  
60

- 1  
2  
3  
4  
5  
6  
7  
8  
9  
10  
11  
12  
13  
14  
15  
16  
17  
18  
19  
20  
21  
22  
23  
24  
25  
26  
27  
28  
29  
30  
31  
32  
33  
34  
35  
36  
37  
38  
39  
40  
41  
42  
43  
44  
45  
46  
47  
48  
49  
50  
51  
52  
53  
54  
55  
56  
57  
58  
59  
60
40. Blumenfeld YJ, El-Sayed YY, Lyell DJ, Nelson LM, Butwick AJ. Risk Factors for Prolonged Postpartum Length of Stay Following Cesarean Delivery. *Am J Perinatol*. 2015;32(9):825-832.
  41. Srinivas SK, Small DS, Macheras M, Hsu JY, Caldwell D, Lorch S. Evaluating the impact of the laborist model of obstetric care on maternal and neonatal outcomes. *Am J Obstet Gynecol*. 2016;215(6):770 e771-770 e779.
  42. W. H. O. Working Group on the Clinical Characterisation Management of Covid-infection. A minimal common outcome measure set for COVID-19 clinical research. *Lancet Infect Dis*. 2020;20(8):e192-e197.
  43. Mehra R, Boyd LM, Ickovics JR. Racial residential segregation and adverse birth outcomes: A systematic review and meta-analysis. *Soc Sci Med*. 2017;191:237-250.
  44. Mehra R, Keene DE, Kershaw TS, Ickovics JR, Warren JL. Racial and ethnic disparities in adverse birth outcomes: Differences by racial residential segregation. *SSM Popul Health*. 2019;8:100417.
  45. United States Census Bureau. Appendix B: Measures of Residential Segregation. <https://www.census.gov/topics/housing/housing-patterns/guidance/appendix-b.html>. Accessed April 3, 2021.
  46. Massey DS, White MJ, Phua V-C. The Dimensions of Segregation Revisited. *Sociol Methods Res*. 1996;25:172-206.
  47. Do DP, Frank R, Finch BK. Does SES explain more of the black/white health gap than we thought? Revisiting our approach toward understanding racial disparities in health. *Soc Sci Med*. 2012;74(9):1385-1393.
  48. Farmer MM, Ferraro KF. Are racial disparities in health conditional on socioeconomic status? *Soc Sci Med*. 2005;60(1):191-204.

- 1  
2  
3 49. Franks P, Muennig P, Lubetkin E, Jia H. The burden of disease associated with being  
4 African-American in the United States and the contribution of socio-economic status.  
5 *Soc Sci Med.* 2006;62(10):2469-2478.  
6  
7  
8  
9 50. Ritter JA, Taylor LJ. Racial Disparity in Unemployment. *The Review of Economics and*  
10 *Statistics.* 2011;93(1):30-42.  
11  
12  
13 51. Bell CN, Owens-Young JL. Self-Rated Health and Structural Racism Indicated by  
14 County-Level Racial Inequalities in Socioeconomic Status: The Role of Urban-Rural  
15 Classification. *J Urban Health.* 2020;97(1):52-61.  
16  
17  
18  
19 52. American Hospital Association Hospital Statistics. 2019 AHA Annual Survey American  
20 Hospital Association. 2020;  
21 <https://www.ahadata.com/system/files/media/file/2020/10/2019AHAAnnual.pdf>.  
22  
23  
24  
25 53. Hung P, Henning-Smith CE, Casey MM, Kozhimannil KB. Access To Obstetric Services  
26 In Rural Counties Still Declining, With 9 Percent Losing Services, 2004-14. *Health Aff*  
27 *(Millwood).* 2017;36(9):1663-1671.  
28  
29  
30  
31 54. Kozhimannil KB, Hung P, Henning-Smith C, Casey MM, Prasad S. Association Between  
32 Loss of Hospital-Based Obstetric Services and Birth Outcomes in Rural Counties in the  
33 United States. *JAMA.* 2018;319(12):1239-1247.  
34  
35  
36  
37 55. Hung P, Casey MM, Kozhimannil KB, Karaca-Mandic P, Moscovice IS. Rural-urban  
38 differences in access to hospital obstetric and neonatal care: how far is the closest one? *J*  
39 *Perinatol.* 2018;38(6):645-652.  
40  
41  
42  
43 56. Braun V, Clarke V. What can "thematic analysis" offer health and wellbeing researchers?  
44 *Int J Qual Stud Health Well-being.* 2014;9:26152.  
45  
46  
47  
48 57. Chmielewska B, Barratt I, Townsend R, Kalafat E, van der Meulen J, Gurol-Urganci I, et  
49 al. Effects of the COVID-19 pandemic on maternal and perinatal outcomes: a systematic  
50 review and meta-analysis. *Lancet Glob Health.* 2021.  
51  
52  
53  
54  
55  
56  
57  
58  
59  
60

- 1  
2  
3 58. ACOG Committee Opinion No. 736: Optimizing Postpartum Care. *Obstet Gynecol*.  
4 2018;131(5):e140-e150.  
5  
6  
7 59. Goodfellow I, Bengio Y, Courville A, Bengio Y. *Deep learning*. Vol 1. Cambridge: MIT  
8 Press; 2016.  
9  
10  
11 60. SC Department of Health and Environmental Control. SCAN Birth Certificate Data.  
12 [https://apps.dhec.sc.gov/Health/SCAN\\_BDP/tables/birthtable.aspx](https://apps.dhec.sc.gov/Health/SCAN_BDP/tables/birthtable.aspx). Accessed January  
13 26, 2021.  
14  
15  
16  
17 61. Yang X, Zhang J, Chen S, Olatosi B, Bruner L, Diedhiou A, et al. Demographic  
18 Disparities in Clinical Outcomes of COVID-19: Data From a Statewide Cohort in South  
19 Carolina. *Open Forum Infect Dis*. 2021;8(9):ofab428.  
20  
21  
22  
23 62. Creswell JW, Plano Clark VL. *Designing and Conducting Mixed Methods Research*. 2nd  
24 Edition ed. Los Angeles: Sage Publications; 2011.  
25  
26  
27  
28 63. Society for Women's Health Research. The Disproportionate Impact of COVID-19 on  
29 Women of Color. 2020; [https://swhr.org/the-disproportionate-impact-of-covid-19-on-](https://swhr.org/the-disproportionate-impact-of-covid-19-on-women-of-color/)  
30 [women-of-color/](https://swhr.org/the-disproportionate-impact-of-covid-19-on-women-of-color/). Accessed April 3, 2021.  
31  
32  
33  
34  
35  
36  
37  
38  
39  
40  
41  
42  
43  
44  
45  
46  
47  
48  
49  
50  
51  
52  
53  
54  
55  
56  
57  
58  
59  
60



1  
2  
3 **Figure 1. Multilevel conceptual framework to examine racial/ethnic disparities in**  
4 **severe maternal morbidity and mortality in the context of COVID-19 Pandemic**  
5

6 **Figure 2. Using concurrent triangulation mixed methods design to investigate**  
7 **racial/ethnic disparities in severe maternal morbidity and mortality during the**  
8 **COVID-19 pandemic**  
9

10 **Figure 3. Estimated power according to prevalence of outcomes and odds ratios**  
11  
12  
13  
14  
15  
16  
17  
18  
19  
20  
21  
22  
23  
24  
25  
26  
27  
28  
29  
30  
31  
32  
33  
34  
35  
36  
37  
38  
39  
40  
41  
42  
43  
44  
45  
46  
47  
48  
49  
50  
51  
52  
53  
54  
55  
56  
57  
58  
59  
60

For peer review only

**Figure 1. Multilevel conceptual framework to examine racial/ethnic disparities in severe maternal morbidity and mortality in the context of COVID-19 pandemic**

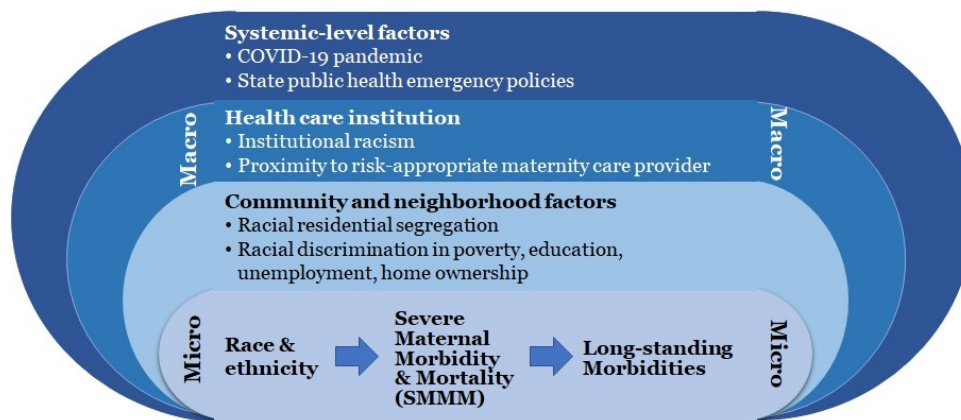

Figure 1

248x202mm (96 x 96 DPI)

**Figure 2. Using concurrent triangulation mixed methods design to investigate racial/ethnic disparities in severe maternal morbidity and mortality during the COVID-19 pandemic**

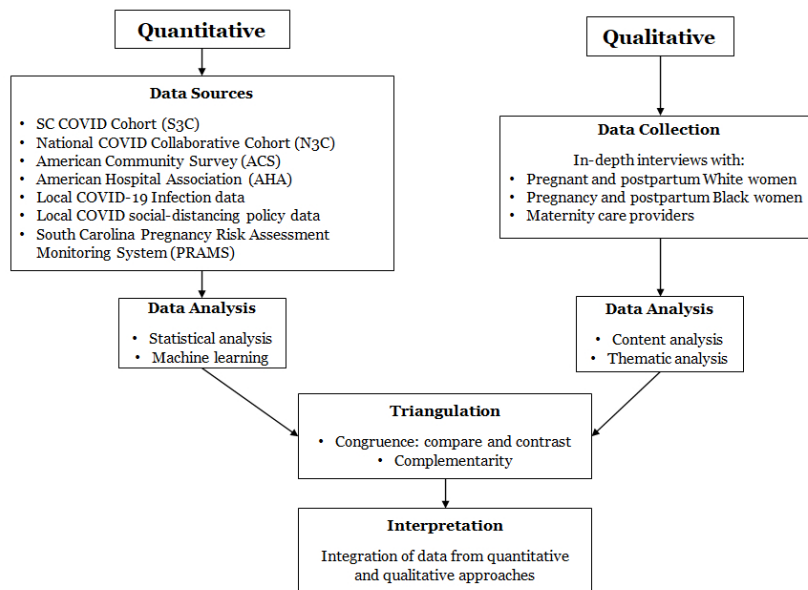

Figure 2

699x510mm (38 x 38 DPI)

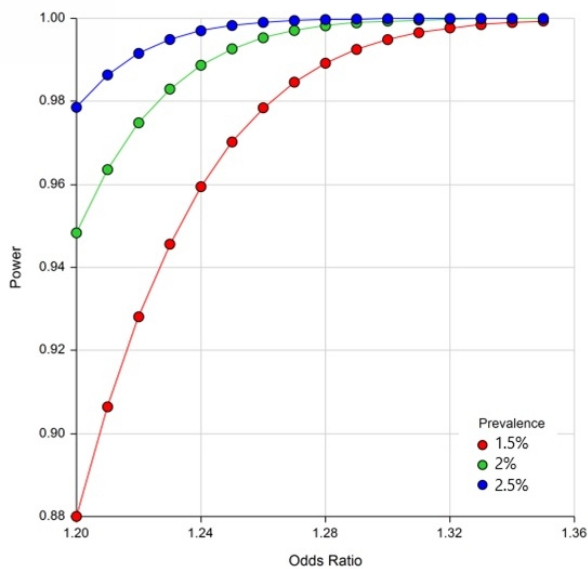

Figure 3

195x128mm (120 x 120 DPI)

# BMJ Open

## Multilevel determinants of racial/ethnic disparities in severe maternal morbidity and mortality in the context of the COVID-19 pandemic in the United States: protocol for a concurrent triangulation, mixed methods study

|                                 |                                                                                                                                                                                                                                                                                                                                                                                                                                                                                                                                                                                                                                                                                                                                                                                                                                                                                                                                                                                               |
|---------------------------------|-----------------------------------------------------------------------------------------------------------------------------------------------------------------------------------------------------------------------------------------------------------------------------------------------------------------------------------------------------------------------------------------------------------------------------------------------------------------------------------------------------------------------------------------------------------------------------------------------------------------------------------------------------------------------------------------------------------------------------------------------------------------------------------------------------------------------------------------------------------------------------------------------------------------------------------------------------------------------------------------------|
| Journal:                        | <i>BMJ Open</i>                                                                                                                                                                                                                                                                                                                                                                                                                                                                                                                                                                                                                                                                                                                                                                                                                                                                                                                                                                               |
| Manuscript ID                   | bmjopen-2022-062294.R2                                                                                                                                                                                                                                                                                                                                                                                                                                                                                                                                                                                                                                                                                                                                                                                                                                                                                                                                                                        |
| Article Type:                   | Protocol                                                                                                                                                                                                                                                                                                                                                                                                                                                                                                                                                                                                                                                                                                                                                                                                                                                                                                                                                                                      |
| Date Submitted by the Author:   | 12-May-2022                                                                                                                                                                                                                                                                                                                                                                                                                                                                                                                                                                                                                                                                                                                                                                                                                                                                                                                                                                                   |
| Complete List of Authors:       | Liu, Jihong; University of South Carolina, Department of Epidemiology & Biostatistics<br>Hung, Peiyin ; University of South Carolina, Health Services Policy and Management<br>Liang, Chen; University of South Carolina, Department of Health Services Policy & Management<br>Zhang, Jiajia; University of South Carolina, Department of Epidemiology and Biostatistics, Arnold School of Public Health<br>Qiao, Shan; University of South Carolina,<br>Campbell, Berry; University of South Carolina, Department of Obstetrics and Gynecology; University of South Carolina, Department of Health Services Policy & Management<br>Olatosi, Bankole; University of South Carolina Arnold School of Public Health, Health Services, Policy and Management<br>Torres, Myriam; University of South Carolina System<br>Hikmet, Neset; University of South Carolina, Department of Integrated Information Technology<br>Li, Xiaoming; University of South Carolina Arnold School of Public Health |
| <b>Primary Subject Heading</b>: | Public health                                                                                                                                                                                                                                                                                                                                                                                                                                                                                                                                                                                                                                                                                                                                                                                                                                                                                                                                                                                 |
| Secondary Subject Heading:      | Epidemiology, Health informatics, Qualitative research, Obstetrics and gynaecology                                                                                                                                                                                                                                                                                                                                                                                                                                                                                                                                                                                                                                                                                                                                                                                                                                                                                                            |
| Keywords:                       | COVID-19, Health informatics < BIOTECHNOLOGY & BIOINFORMATICS, EPIDEMIOLOGY, Maternal medicine < OBSTETRICS, PERINATOLOGY, PUBLIC HEALTH                                                                                                                                                                                                                                                                                                                                                                                                                                                                                                                                                                                                                                                                                                                                                                                                                                                      |
|                                 |                                                                                                                                                                                                                                                                                                                                                                                                                                                                                                                                                                                                                                                                                                                                                                                                                                                                                                                                                                                               |

SCHOLARONE™  
Manuscripts

1  
2  
3 **Multilevel determinants of racial/ethnic disparities in severe maternal morbidity**  
4 **and mortality in the context of the COVID-19 pandemic in the United States:**  
5 **protocol for a concurrent triangulation, mixed methods study**  
6  
7  
8  
9

10 *Jihong Liu,<sup>1</sup> Peiyin Hung,<sup>2,3</sup> Chen Liang,<sup>2,3</sup> Jiajia Zhang,<sup>1,3</sup> Shan Qiao,<sup>3</sup> Berry A. Campbell,<sup>5</sup>*  
11 *Bankole Olatosi,<sup>2,3</sup> Myriam Torres,<sup>1</sup> Neset Hikmet,<sup>3,6</sup> Xiaoming Li.<sup>3,4</sup>*  
12  
13  
14  
15  
16

17 <sup>1</sup> Department of Epidemiology & Biostatistics, Arnold School of Public Health, University of  
18 South Carolina. 915 Greene Street, Columbia, SC 29208, USA.  
19

20 <sup>2</sup> Department of Health Services Policy & Management, Arnold School of Public Health,  
21 University of South Carolina. 915 Greene Street, Columbia, SC 29208, USA.  
22  
23

24 <sup>3</sup> Big Data Health Science Center, University of South Carolina, 915 Greene Street, Columbia, SC  
25 29208, USA.  
26  
27

28 <sup>4</sup> Department of Health Promotion, Education, & Behavior, Arnold School of Public Health,  
29 University of South Carolina. 915 Greene Street, Columbia, SC 29208, USA.  
30  
31

32 <sup>5</sup> Berry A. Campbell, MD, Department of Obstetrics and Gynecology, School of Medicine,  
33 University of South Carolina. Two Medical Park, Columbia, SC 29203, USA.  
34  
35

36 <sup>6</sup> Department of Integrated Information Technology, College of Engineering and Computing,  
37 University of South Carolina. 550 Assembly Street, Columbia, SC 29208, USA.  
38  
39  
40  
41

42  
43  
44  
45  
46  
47  
48  
49 **Correspondence to:**  
50  
51  
52  
53  
54  
55  
56  
57  
58  
59  
60

1  
2  
3 Dr. Jihong Liu, Professor of Epidemiology, Department of Epidemiology & Biostatistics, Arnold  
4 School of Public Health, University of South Carolina. 915 Greene Street, Columbia, SC 29208,  
5  
6  
7 USA. [jliu@mailbox.sc.edu](mailto:jliu@mailbox.sc.edu). Phone: 803 777 6854  
8  
9  
10  
11  
12  
13  
14  
15  
16  
17  
18  
19  
20  
21  
22  
23  
24  
25  
26  
27  
28  
29  
30  
31  
32  
33  
34  
35  
36  
37  
38  
39  
40  
41  
42  
43  
44  
45  
46  
47  
48  
49  
50  
51  
52  
53  
54  
55  
56  
57  
58  
59  
60

For peer review only

## ABSTRACT

**Introduction:** The COVID-19 pandemic has affected communities of color the hardest. Non-Hispanic Black and Hispanic pregnant women appear to have disproportionate SARS-CoV-2 infection and death rates.

**Methods and analysis:** We will use the socio-ecological framework and employ a concurrent triangulation, mixed methods study design to achieve three specific aims: 1) examine the impacts of the COVID-19 pandemic on racial/ethnic disparities in severe maternal morbidity and mortality (SMMM); 2) explore how social contexts (e.g., racial/ethnic residential segregation) have contributed to the widening of racial/ethnic disparities in SMMM during the pandemic and identify distinct mediating pathways through maternity care and mental health; and 3) determine the role of social contextual factors on racial/ethnic disparities in pregnancy-related morbidities using machine learning algorithms. We will leverage an existing South Carolina COVID-19 Cohort (S3C) by creating a pregnancy cohort that links COVID-19 testing data, electronic health records (EHR), vital records data, healthcare utilization data, and billing data for all births in South Carolina (SC) between 2018-2021 (>200,000 births). We will also conduct similar analyses using EHR data from the National COVID Cohort Collaborative (N3C) including >209,000 women who had a childbirth between 2018-2021 in the United States. We will use a convergent parallel design which includes a quantitative analysis of data from the 2018-2021 SC Pregnancy Risk Assessment and Monitoring System (unweighted n > 2,000) and in-depth interviews of 40 postpartum women and 10 maternal care providers to identify distinct mediating pathways.

**Ethics and dissemination:** The study was approved by institutional review boards at the University of SC (Pro00115169) and the SC Department of Health and Environmental Control (DHEC IRB.21-030). Informed consent will be provided by the participants in the in-depth



1  
2  
3 interviews. Study findings will be disseminated with key stakeholders including patients,  
4  
5 presented at academic conferences, and published in peer-reviewed journals.  
6  
7

### 8 **Strengths and limitations of this study**

9

- 10 • This study investigates whether the COVID-19 pandemic, structural racism, and racial  
11 discrimination have contributed to the racial/ethnic disparities in severe maternal  
12 morbidity and mortality in the United States.
  - 13 • This study employs a state-of-the-art design (i.e., a convergent parallel design) and  
14 machine learning models to rigorously examine the questions of interest.
  - 15 • This study will use a large-scale population-based cohort study concurrently for both  
16 South Carolina and the United States, which will innovatively integrate COVID-19-  
17 related clinical, surveillance, EHR, and geospatial data at community, healthcare  
18 institutions, and system/policy levels.
  - 19 • The effects of both county- and ZIP-code-level social contexts will be calculated at the  
20 maternal residence location.
  - 21 • The stagnant residential social contexts might not reflect their long-term exposures to  
22 neighborhood structural racism.
- 23  
24  
25  
26  
27  
28  
29  
30  
31  
32  
33  
34  
35  
36  
37  
38  
39  
40  
41  
42  
43  
44  
45  
46  
47  
48  
49  
50  
51  
52  
53  
54  
55  
56  
57  
58  
59  
60

## INTRODUCTION

Annually, nearly 60,000 women experience severe maternal morbidity (i.e., unexpected complications of labor and delivery) and mortality (SMMM).<sup>1,2</sup> Between 1993-2014, SMMM rates in the U.S. tripled from 49.5 to 146.6 per 10,000 childbirths.<sup>3</sup> For every 70 U.S. women who experienced a severe maternal morbidity, one died during or immediately after pregnancy.<sup>4</sup> The severe maternal morbidity occurrences have also led to significant short- or long-term clinical impacts on women's health<sup>5</sup> and added significant costs to women, their families, taxpayers and the healthcare system.<sup>6-8</sup>

Non-Hispanic Black (hereafter, Black) women experience a 3- to 4-fold risk of pregnancy-related deaths compared to non-Hispanic White women (hereafter, White).<sup>9,10</sup> Black and Hispanic women were up to 110 percent more likely to experience SMMM,<sup>2</sup> despite their younger maternal age (often a protective factor for SMMM) as compared to non-Hispanic White women. Such racial/ethnic disparities in SMMM rates have persisted for over a decade – with increasing rates among all race/ethnic groups.<sup>11</sup> These SMMM rates are unevenly distributed socioeconomically and geographically – with the highest rate among low-income women who delivered at hospitals in the Deep South states.<sup>2,12-14</sup>

The unprecedented COVID-19 pandemic hit communities of color the hardest.<sup>15-17</sup> Pregnant Black and Hispanic women experienced disproportionate COVID-19 infection and death rates.<sup>18-20</sup> The impacts of COVID-19 on SMMM remain unclear. During the pandemic, as unemployment, income instability, and financial stress have affected many U.S. families, Black and Hispanic families have faced even higher hardship rates.<sup>21</sup> These disproportionate consequences reflect longstanding inequities, often stemming from structural racism and discrimination (e.g., residential segregation, poverty, inadequate education, unemployment, and lack of home ownership).<sup>22,23</sup> These inequities can lead to uneven access to quality healthcare, psychosocial stress, and unhealthy lifestyles among women of color, which further increases SMMM risk.<sup>24,25</sup> Yet, the etiology of SMMM is complex, multifaceted, and time-varying. Prior

1  
2  
3 research efforts on racial/ethnic disparities in SMMM have mostly focused on maternal and  
4 healthcare factors,<sup>26</sup> leaving questions regarding the dynamics and interactions of multilevel  
5 determinants, such as the broader social contexts of these risks, largely unanswered. Thus, there  
6 is an urgent need to examine how social contexts of all types play out in SMMM rates, especially  
7 during the COVID-19 pandemic.<sup>22,23</sup>

8  
9  
10  
11  
12  
13 South Carolina (SC) ranked 11th in COVID-19 cases per capita as of December 23, 2021.<sup>27</sup>  
14  
15 Prior to the pandemic, SC ranked 42nd in the U.S. in overall health and 41st in maternal  
16 mortality.<sup>28</sup> Births to Black women accounted for nearly 30% of all SC births.<sup>29</sup> Black women  
17 living in SC experienced a 2- to 3-fold higher risk of SMMM than their White counterparts.<sup>30</sup>  
18  
19 The majority of counties in SC are designated medically underserved areas.<sup>31</sup> Considering SC's  
20 poor health ranking, striking racial disparities in SMMM, racially diverse population, and  
21 historical systemic Southern contexts, SC is an ideal environment in which to examine health  
22 disparities in SMMM occurring during the COVID-19 pandemic.

23  
24  
25  
26  
27  
28  
29  
30 The overarching goal of this study is to investigate racial/ethnic disparities in SMMM, the  
31 contributing roles and mediating pathways of social contexts (e.g., structural racism, racial  
32 discrimination), and the long-standing health consequences of the pandemic by studying the  
33 distributions of COVID-19 cases and multilevel determinants of maternal health in SC and the  
34 U.S. Our study will: 1) examine the impacts of the COVID-19 pandemic on racial/ethnic  
35 disparities in SMMM; 2) examine and explore how the key features of social contexts (including  
36 structural racism and racial discrimination) have contributed to the widening racial/ethnic  
37 disparities in SMMM during the pandemic and identify distinct mediating pathways through  
38 maternity care and mental health; and 3) examine and identify the role of social contextual  
39 factors and protective factors on racial/ethnic disparities in pregnancy-related long-standing  
40 morbidities (e.g., hypertension, pulmonary embolism, diabetes, cardiovascular disease), using  
41 machine learning algorithms.

## METHODS AND ANALYSIS

### Multilevel conceptual framework

The etiology of racial/ethnic disparities in SMMM is complex and multifaceted (**Figure 1**).<sup>24</sup> At the micro-level, in addition to maternal race/ethnicity, other socio-demographics (e.g., age, socioeconomic status [SES]), health behaviors (e.g., prenatal care adequacy, smoking, diet, physical activity, gestational weight gain), and preexisting maternal conditions (e.g., hypertension, pre-pregnancy body mass index (BMI), diabetes, HIV infection, obstetric comorbidity scores) potentially drive racial/ethnic disparities in SMMM.<sup>12,32,33</sup> As compared to White women, Black and Hispanic women usually have higher poverty rates, lower educational levels, and higher rates of preexisting conditions or high-risk pregnancy.<sup>32</sup> At the macro level, structural racism and discrimination - community and neighborhood factors (e.g., residential segregation, inadequate housing, lack of access to healthy food, no public transportation), healthcare institutional attributes (e.g., access to risk appropriate perinatal care), and system-level factors (e.g. COVID-19 pandemic, state public health emergency policies) may play a role in racial/ethnic disparities. These macro-level factors interact with micro-level factors to further exacerbate racial/ethnic disparities in SMMM.

### Study design

The above-mentioned multilevel conceptual framework guided our study design (Figure 2). We will employ a concurrent triangulation, mixed methods study design to rigorously examine racial/ethnic disparities in SMMM in SC and the U.S. This convergent parallel design will allow us to better understand the underlying mechanisms for social contexts and racial/ethnic disparities in SMMM via maternity care and mental health using the data from the statewide pregnancy survey and via qualitative interviews with pregnancy and postpartum women and maternity care providers. Given the multilevel and multidomain nature of risk factors for pregnancy-related long-standing morbidities, we will use novel machine learning models to forecast the intertwining social context effects with multilevel factors on maternal health during

1  
2  
3 the COVID-19 pandemic. We will conduct data analyses using the quantitative and qualitative  
4 methods concurrently. Then we will compare and contrast findings from these two methods for  
5 similarities and incongruences and will interpret findings jointly.  
6  
7

### 8 9 Data sources

10 We will leverage our statewide South Carolina COVID-19 Cohort (S3C) database, which  
11 integrates COVID-19-related clinical, surveillance, electronic health records (EHR) and  
12 geospatial and temporal data at community, healthcare institutional, and system levels to  
13 comprehensively examine the roles of social contexts on racial/ethnic disparities in SMMM. To  
14 ensure the generalizability of our findings, we will also examine them using EHR data from the  
15 ongoing National COVID Cohort Collaborative (N3C).<sup>34</sup> Nationwide social context databases  
16 (e.g. American Community Survey [ACS], American Hospital Association [AHA]) and time-  
17 varying COVID-19 infection and social distancing policies data will be added to both S3C and  
18 N3C. Postpartum women's survey responses and in-depth interview data will be analyzed to  
19 understand complex pathways and multilevel determinants of maternal morbidities (Figure 2).  
20  
21  
22  
23  
24  
25  
26  
27  
28  
29  
30  
31

32 *SC COVID-19 Cohort – Pregnancy (S3C-P) Database.* With support from the National  
33 Institute of Allergy and Infectious Disease (NIAID) (R01A127203-4S1), our team has established  
34 a statewide S3C database for COVID-19 research since 06/2020 by integrating various state-  
35 level data sources including: 1) the COVID-19 testing data from the SC Department of Health  
36 and Environmental Control (SC DHEC), 2) hospital encounter data for inpatient hospitalization,  
37 outpatient surgery, home health, and emergency departments; 3) health utilization data from  
38 large public and private health insurance plans (e.g., Medicaid, State Health Plan, BlueCross  
39 BlueShield of SC); 4) EHR data from health systems (Prisma & MUSC), and 5) program data  
40 from the SC Department of Mental Health (SC DMH). The database is updated every 6 months.  
41  
42  
43  
44  
45  
46  
47  
48  
49  
50

51 In this study, as part of the National Institutes of Health (NIH)'s “Implementing a Maternal  
52 health and PRenancy Outcomes Vision for Everyone” (IMPROVE) initiative supported by the  
53 Office of Director, NIH (3R01A127203-5S2), our team will create a population based S3C  
54  
55  
56  
57  
58  
59  
60

1  
2  
3 pregnant women cohort (S3C-P), which includes all women who gave birth between 2018-2021  
4 in SC (>200,000 births, 57.2% White, 31.1% Black, 4.6% Hispanic) and will add vital record data  
5 (birth and death certificates) to complement existing linkages from the parent S3C cohort. The  
6 identification of pregnancy status and COVID-19 infection will be cross-verified using EHR,  
7 claims data, laboratory reports, and ongoing SC DHEC medical chart reviews among > 4,387  
8 pregnant women with confirmed COVID-19 infections in SC as of December 2021. The SC Office  
9 of Revenue and Fiscal Affairs (SC RFA) will collate databases and provide our team with a de-  
10 identified linked database system.<sup>35</sup>

11  
12  
13  
14  
15  
16  
17  
18  
19  
20 *National COVID Cohort Collaborative (N3C)*. The N3C is a novel data consortium that  
21 integrates EHR and medical claims data from 92 healthcare systems and institutes across 50  
22 states. N3C enables data sharing, computable phenotypes, and collaborative data mining by  
23 harmonizing EHR data of diverse standards using Observational Medical Outcomes Partnership  
24 (OMOP) Clinical Data Model (CDM). N3C was created to study potential risk factors and  
25 protective factors of COVID-19 and its long-term health consequences.<sup>34</sup> As of December 24,  
26 2021, N3C has aggregated 9.4 million patients (3.3 million COVID-19 patients) with their EHR  
27 dating back from January 2018, including 1.9 million women with COVID-19 (>61k pregnant  
28 women), and 3.5 million women without COVID-19 (>209k pregnant women). The participants  
29 in N3C represent diverse populations in the U.S. (e.g., geographic, socioeconomic,  
30 racial/ethnic). Building on a secured cloud environment, N3C provides data harmonization,  
31 privacy-preserving data linkage, and high-performance data analytics. Our team has already  
32 gained access to the restricted N3C database including ZIP codes of patients and health systems  
33 and dates of services.

34  
35  
36  
37  
38  
39  
40  
41  
42  
43  
44  
45  
46  
47  
48  
49 *Nationwide social context databases*. The 2015-2019 American Community Survey (ACS)  
50 and the 2018-2020 American Hospital Association (AHA) Annual Survey will be used to  
51 calculate county-level residential segregation measures, racial discrimination in SES, and ZIP-  
52 level accessibility to hospital-based obstetric units.

1  
2  
3 *Time-varying local COVID-19 infection and social-distancing policy data.* To better  
4 understand local pandemic settings, we will also add the Centers for Disease Control and  
5 Prevention (CDC) COVID-19 Case Surveillance restricted datasets for nationwide cases  
6 confirmed since March 11, 2020, and CDC's state-level social distancing policies (e.g. emergency  
7 declaration, stay at home order, etc.) in early pandemic and telehealth services expansion data  
8 and each corresponding date of enactment.<sup>36</sup>

9  
10  
11  
12  
13  
14  
15  
16 *SC Pregnancy Risk Assessment Monitoring System (PRAMS).* SC PRAMS as a part of  
17 national PRAMS is an ongoing survey of SC mothers who have recently given birth.<sup>37</sup> These  
18 mothers are sampled from state birth certificates. After statistical weighting, PRAMS data are  
19 representative of all mothers who gave birth in SC. SC PRAMS added 11 COVID-19-related  
20 questions for mothers who delivered in August 2020 and after in their survey. SC PRAMS  
21 routinely collects detailed psychosocial and behavioral risk factors for each participant, which  
22 are not available in S3C and N3C. Residential ZIP codes will be used to add in social contextual  
23 variables and other ZIP- or county-level characteristics. The unweighted sample size for SC  
24 2018-2021 PRAMS will be at least 2,000.

### 25 Key measures

26  
27  
28  
29  
30  
31  
32  
33  
34  
35  
36 *Outcome measures.* The main outcomes of interest will be SMMM.<sup>38</sup> We will adapt from a  
37 previously validated algorithm by using the International Classification of Diseases, Tenth  
38 Revision, Clinical Modification (ICD-10-CM) diagnosis and procedure codes to identify women  
39 with one or more of the 21 severe maternal morbidity (SMM) indicators developed by the CDC  
40 and updated by the Alliance for Innovation on Maternal Health (AIM) program at the time of  
41 childbirth. Maternal mortality will be identified using statewide death certificate data from the  
42 childbirth date to up to one year postpartum. A composite variable of SMMM will be created to  
43 reflect SMM or maternal mortality incidence. We will also study maternal morbidity and  
44 mortality (MMM) composite, which includes mortality and morbidities related to hypertensive  
45 disorders of pregnancy, postpartum hemorrhage, and infections/sepsis that happen during  
46  
47  
48  
49  
50  
51  
52  
53  
54  
55  
56  
57  
58  
59  
60

1  
2  
3 pregnancy through 6 weeks postpartum.<sup>39</sup> Other outcomes to be studied include: 1) adverse  
4 maternal outcomes including intensive care unit (ICU) admission, invasive ventilation, receipt  
5 of extracorporeal membrane oxygenation (ECMO), etc.; 2) prolonged length of stay (LOS),<sup>40,41</sup>  
6 and 3) hypertension, pulmonary embolism, type 2 diabetes, cardiovascular diseases (e.g. heart  
7 attack, myocardia infraction, thrombus, stroke) diagnosed within one year after delivery.  
8  
9

10  
11  
12  
13 *COVID-19 status and severity.* Eligible COVID-19 cases are those with a positive test for  
14 SARS-CoV-2 since March 11, 2020, during pregnancy. Data on symptom status (symptomatic,  
15 asymptomatic, unknown) is available, while severity will be defined using the World Health  
16 Organization's (WHO) Clinical Progression Scale.<sup>42</sup>  
17  
18

19  
20  
21 *Social context measures.* The five dimensions of county-level *residential segregation*,  
22 including evenness, exposure, concentration, centralization, and clustering,<sup>43,44</sup> will be  
23 determined for each race/ethnic group (e.g., Black, Hispanic) using the ACS Census tract  
24 data.<sup>45,46</sup> Each index will be calculated across census tracts within residential counties. Higher  
25 values indicate higher levels of segregation. We will create the group indicator for segregated  
26 versus less segregated counties using the cutoffs for each dimension index.<sup>46</sup> Additional hyper-  
27 segregation index – segregations scores at  $\geq 0.6$  on at least four aforementioned dimensions –  
28 will be created to reflect the highest levels of segregation.<sup>46</sup> Within-county *racial/ethnic*  
29 *discrimination in SES* will be calculated using the ACS county data,<sup>45</sup> including Black-White and  
30 Hispanic-White ratios of poverty, unemployment, and home ownership rates.<sup>47-51</sup> These  
31 measures will be linked to databases via maternal residence counties.  
32  
33  
34  
35  
36  
37  
38  
39  
40  
41  
42  
43

44  
45 *Healthcare institution.* Using the AHA annual survey data on hospital location,<sup>52</sup> we will  
46 identify *loss of hospital-based obstetric units* using our published validated algorithm.<sup>53-55</sup> An  
47 indicator for whether a hospital or a hospital's obstetric service was closed for each year will be  
48 created. In turn, women's access to hospital-based obstetric care within 30-mile distance for  
49 years 2018-2020 using the ArcGIS fastest route network will be determined: 1) had access to; 2)  
50 no access to; and 3) experienced the loss of all hospital-based obstetric units.  
51  
52  
53  
54  
55  
56  
57  
58  
59  
60



1  
2  
3 *County-level COVID-19 infections and social distancing policies.* The CDC's COVID-19 Case  
4 Surveillance will be used to compute monthly cumulative rates of in-county residents that had  
5 been confirmed COVID-19 positive, hospitalized, admitted to an intensive care unit, and with  
6 mechanical ventilation (MV)/intubation as a result of COVID-19 disease. Number of months  
7 elapsed since a county had each of the following policy orders will be calculated from a delivery  
8 date: emergency declaration, closures of bars, restaurants, and/or other non-essential business,  
9 stay at home order, and telehealth services expansion.  
10  
11  
12  
13  
14  
15  
16

### 17 Statistical analyses

#### 18 *Impacts of the COVID-19 pandemic on racial/ethnic disparities in SMMM*

19  
20 We will examine the overall impacts of the COVID-19 pandemic on SMMM using the data from  
21 the S3C-P and N3C. We hypothesize that: 1) compared to pre-pandemic periods, SMMM has  
22 increased during the pandemic and racial/ethnic disparities have widened during the pandemic;  
23 and 2) compared to pregnant women without COVID-19 infection, women with COVID-19  
24 infection experienced higher proportions of SMMM, and racial/ethnic disparities in SMMM  
25 have amplified among COVID-19 infected women.  
26  
27  
28  
29  
30  
31  
32  
33

34 First, we will examine the distributions for all measures and clean the database (e.g. outliers,  
35 data entry errors etc.) using appropriate statistical techniques. Second, we will conduct  
36 preliminary analyses and examine descriptive statistics for outcome measures. Unadjusted and  
37 adjusted associations of SMMM with key variables and covariates will be assessed using  
38 appropriate statistical procedures (e.g., tests of proportions, chi-square tests, analysis of  
39 variance).  
40  
41  
42  
43  
44  
45  
46

47 Women who gave birth between January 1, 2018 through March 10, 2020, will be  
48 categorized as before pandemic, while women who gave birth between March 11, 2020 through  
49 December 31, 2021, will be considered as during the pandemic. The pre-pandemic vs pandemic  
50 impact on SMMM will be modeled via logistic regression. First, the crude model with the  
51 pandemic indicator only will address SMMM change before and after the pandemic. Second, to  
52  
53  
54  
55  
56  
57  
58  
59  
60

1  
2  
3 investigate whether racial/ethnic disparities in SMMM have widened during the pandemic, the  
4 crude model will be further adjusted with race/ethnicity, interactions between race/ethnicity  
5 and pandemic indicator, and months elapsed since March 11, 2020, on delivery dates. Then  
6 additional variables will be added, including individual-level characteristics (e.g., age, SES proxy  
7 [i.e., Medicaid/uninsured status], parity, marital status, underlying health conditions). Variable  
8 selection and goodness of model fit will be evaluated using the AIC, BIC, and likelihood ratio  
9 test.  
10  
11  
12  
13  
14  
15  
16

17 We will also conduct analyses in women who delivered during the COVID-19 pandemic by  
18 comparing pregnant women with and without COVID-19 infection. We will first create the  
19 COVID infection indicator and then will perform the similar analysis as those for the pre-  
20 pandemic vs pandemic impact. We will further adjust for county-level COVID-19 infections per  
21 capita and social distancing policies at the appropriate time points using logistic regressions  
22 with random effects accounting for correlations among counties.  
23  
24  
25  
26  
27  
28  
29

### 30 *Social contexts, racial/ethnic disparities in SMMM, and distinct mediating pathways*

31 We will study these issues using different databases and methods. First, we will examine the  
32 association between social contexts and changes in racial/ethnic disparities in SMMM before  
33 and during the pandemic. We hypothesize that racial/ethnic disparities SMMM are potentially  
34 disproportionately widened in communities with higher racial/ethnic economic disparities  
35 (measured by Black-White ratios of economic disadvantages, Hispanic-White ratios of economic  
36 disadvantages) and in higher vs. less segregated Black or Hispanic counties (measured by  
37 residential segregation). We will conduct a parallel analysis between social contexts and SMMM  
38 using the data from S3C-P and N3C (**Figure 2**). Similarly, we will examine the contributing  
39 roles of social contexts to racial/ethnic disparities in SMMM in the overall sample (pre-  
40 pandemic vs pandemic) and between COVID-19 positive vs COVID-19 negative women. The  
41 multilevel variables that will be investigated include individual-level characteristics,  
42 community-level characteristics (ZIP code accessibility of hospital obstetric units), and county-  
43  
44  
45  
46  
47  
48  
49  
50  
51  
52  
53  
54  
55  
56  
57  
58  
59  
60

1  
2  
3 level characteristic (social contexts: residential segregation and racial discrimination on SES;  
4 COVID-19 infection per capita and social distancing policies). For exploratory analysis, the odds  
5 ratio (OR) of SMMM among Black and White and the social context level at the county level pre-  
6 pandemic vs pandemic will be visualized via the spatial temporal map using GIS. The summary  
7 statistics in SMMM with respect to race/ethnicity will be calculated according to individual- and  
8 county-level characteristic.  
9

10  
11 We will model SMMM via multilevel hierarchical logistic regression. Women who reside at  
12 the same community- or county-level will be accounted for via random effects, which will be  
13 further modeled in the regression model with a multivariate normal distribution to account for  
14 the correlations among community or county. We plan to use an incremental modeling strategy:  
15 1) crude model (race/ethnicity and social context factors); 2) adjusting for individual level  
16 factors; and 3) additional adjustment of additional community- and county-levels  
17 characteristics. For N3C data, we will further adjust for state or Census region. To further  
18 examine whether social contexts moderate racial/ethnic disparities in SMMM and whether  
19 these disparities vary between pre-pandemic and pandemic, we will include two-way and three-  
20 way interaction terms in the model (e.g., pandemic period\*social context\*race). To examine the  
21 added impact of COVID-19 infections on SMMM, we will repeat the model by restricting it to all  
22 women who gave birth during pandemic period (delivered after March 11, 2020) and including  
23 maternal COVID-19 severity status in the model. Models will be compared using the AIC and  
24 BIC criteria. In the modelling procedure, the outliers, missingness, multicollinearity, and  
25 nonlinear will be addressed accordingly, and sensitivity analysis will be conducted comparing  
26 models with or without the treatment of outliers or missing data. The magnitude and direction  
27 racial/ethnic disparities will be assessed through OR and its 95% confidence interval.  
28  
29

30  
31 Second, we will use a convergent parallel design to evaluate the underlying pathways  
32 between social contexts and racial/ethnic disparities in MMM via pandemic stressors, maternity  
33 care (prenatal and postpartum) and mental health condition. We hypothesize that social  
34  
35  
36  
37  
38  
39  
40  
41  
42  
43  
44  
45  
46  
47  
48  
49  
50

1  
2  
3 contexts might hinder maternity care and worsen mental health conditions among Black and  
4  
5 Hispanic women during the pandemic and exacerbate racial/ethnic disparities in MMM.  
6

7 The quantitative analysis will be conducted using SC PRAMS data, which have unique data  
8  
9 elements that are not available in S3C-P and N3C. The 2018-2021 SC PRAMS data will provide a  
10  
11 more refined understanding of COVID-19 stressors, psychosocial stress, and healthcare  
12  
13 utilization through the questionnaire, including pandemic stressors (financial, job loss,  
14  
15 childcare, etc.), individual mitigation practices, changes in prenatal and postpartum care,  
16  
17 psychosocial stress, barriers to health services, intimate partner violence (IPV), prenatal and  
18  
19 postpartum care utilization, smoking, alcohol use, gestational weight gain, and mental health.  
20  
21 SC PRAMS asks respondents to assess how often they experienced depressive symptoms after  
22  
23 delivery. Descriptive statistics will be used to examine pandemic-related changes in MMM and  
24  
25 psychosocial and behavioral changes between pre-pandemic (delivered before March 11, 2020)  
26  
27 and pandemic periods (March 11, 2020 and after). The weighted hierarchical regression model  
28  
29 will be applied to examine the association between social context and MMM. As previously  
30  
31 mentioned, community and county levels will also be modeled in the regression. Different from  
32  
33 the prior analyses above: 1) individual characteristics will mainly come from PRAMS or birth  
34  
35 certificates; 2) the weight based on complex survey design will be modeled; and 3) individual  
36  
37 reports of healthcare utilization and mental health condition included.  
38  
39

40 We will conduct in-depth interviews among 40 postpartum women of color (~20 African  
41  
42 American; ~20 Hispanic) stratified by COVID-19 infection status and 10 maternal care  
43  
44 providers (MCPs) who serve pregnant and postpartum women in Black and Latino  
45  
46 communities. The inclusion criteria of postpartum women include: 1)  $\geq 18$  years old; 2) either  
47  
48 African American or Hispanic; 3) have given birth in 2021; and 4) living in SC. We will  
49  
50 purposely recruit postpartum women and MCPs through local OBGYN clinics and community  
51  
52 health organizations that serve a larger proportion of low-income Black and Hispanic women.  
53  
54 We will train female interviewers of the same race as the interviewees to obtain trust from the  
55  
56  
57  
58  
59  
60

1  
2  
3 postpartum women participants, and interviews in Spanish will be conducted as needed. Guided  
4  
5 by the conceptual framework, the main topics of the postpartum women interviews will include:  
6  
7 1) their perceptions toward their healthcare providers and institutions for perinatal care; 2)  
8  
9 experience with prenatal and postpartum care; 3) stressors in the COVID-19 pandemic; 4)  
10  
11 challenges in healthcare seeking (e.g., appointments, clinic visits), especially from structural  
12  
13 factors (racism and discrimination); and 5) their needs/recommendations for future healthcare.  
14  
15 The main topics of the MCPs include: 1) stressors and challenges of their clients; 2) clients'  
16  
17 mental health conditions; 3) impacts of COVID-19 on their care provision; and 4) their views on  
18  
19 health disparities caused by structural factors. The interviews will last 50 minutes and will be  
20  
21 recorded with each participant's consent. Audio recordings will be transcribed and coded using  
22  
23 NVivo 11.0. We will employ thematic analyses.<sup>56</sup> The findings will complement the quantitative  
24  
25 data in providing a comprehensive picture on how COVID-19 affects psychosocial well-being of  
26  
27 the postpartum women of color; offer in-depth interpretation and explanation of quantitative  
28  
29 results; and explore the mediating pathways in which structural factors amplify existing  
30  
31 disparities in maternal health in the context of the pandemic.  
32  
33

### 34 *Machine learning-based predictive models*

35  
36 We will develop and evaluate machine learning-based predictive models to identify risk factors  
37  
38 of SMMM and forecast progression of hypertensive disorder, pulmonary conditions, type 2  
39  
40 diabetes mellitus, and cardiovascular diseases among postpartum women. The predictive  
41  
42 models will synthesize individuals' demographics, EHR, social contextual factors, and  
43  
44 community and healthcare system level data to make predictions of individuals' clinical  
45  
46 outcomes at key time points. Because data sources suggestive of these factors are variable and  
47  
48 high-dimensional, and these factors are inherently interconnected over time,<sup>57</sup> machine learning  
49  
50 is a superior approach to predicting clinical outcomes and proactively detecting the associated  
51  
52 risk factors for early intervention and treatment. Constructed models will demonstrate critical  
53  
54 factors predictive of clinical outcomes and how these factors interact over time.  
55  
56  
57  
58  
59  
60

1  
2  
3 Supervised machine learning algorithm will be adopted for the predictive models. Using  
4 N3C, the algorithm will learn from input variables and predict SMMM and long-standing  
5 morbidities (e.g., hypertension, pulmonary embolism, diabetes, cardiovascular diseases) over  
6 time. Input variables will include maternal characteristics, e.g., socio-demographics, socio-  
7 behavioral data, social context variables, diagnoses, procedures, laboratory tests, and  
8 medications. The prediction of SMMM and long-standing morbidities will take place at critical  
9 time points: <3, 6, 12 weeks, 6 and 12 months postpartum.<sup>58</sup> We will develop Deep Learning  
10 algorithms because of their ability to integrate complex clinical data and social contexts from  
11 multiple sources with superior predictive performance, including: 1) convolutional neural  
12 network (CNN) for its ability to capture dynamic patterns among multilevel input variables; 2)  
13 recurrent neural network (RNN) with long short-term memory (LSTM) architecture for its  
14 ability of capturing temporal patterns of clinical events (e.g., onset of pre-infection conditions,  
15 viral infections and clinical events marked with gestational weeks, and the date of childbirths);  
16 and 3) Deep Boltzmann Machine (DBM) for its interpretable scoring mechanism for risk  
17 prediction.<sup>59</sup>

18  
19 We will use a 10-fold cross validation. Specifically, S3C and N3C data will each be randomly  
20 partitioned into ten splits. In each of the ten iterations, seven splits of data will be randomly  
21 selected for model training, two splits of data will be used for internal validation (finetuning  
22 hyperparameters), and the 10th split used for testing. We will use F measure, precision, recall,  
23 and the area under the Receiver Operating Characteristic curve (AUC), if unbalanced data, to  
24 measure the predictive performance of models. We will use support vector machine (SVM) as  
25 the baseline algorithm to compare against the performance of CNN, RNN (LSTM), and DBM.  
26 The best-performed model will be identified based on F measure.

27  
28 We will rank input variables and/or clusters of input variables by calculating the importance  
29 scores <sup>57</sup> (e.g., mutual information, SVM-based recursive linear elimination). Two content co-  
30 investigators will independently review the ranked results and identify clinical/social risk

1  
2  
3 factors. Disagreement between two reviewers will be resolved by panel discussion. Development  
4 of sophisticated machine learning models for predicting long-standing morbidities will be used  
5 to identify important risk factors prenatally, which can be used for early intervention, treatment,  
6 and community-wide interventions.  
7  
8  
9

10  
11 *Power and sample size calculation.* We estimate that there were 200,000 women who gave  
12 birth in S3C and 270,000 pregnant women in N3C for our study period. The primary outcome of  
13 interest is SMM and the main exposures of interest are race (White vs Black) and pre-peri  
14 COVID period. We assume that there are 64,000 (32%) Black and 114,000 (57%) White in S3C<sup>60</sup>  
15 and 38,070(14.1%) Black and 160,380 (59.4%) White in N3C.<sup>61</sup> We also assume that with the  
16 same time length of pre and peri COVID-19, the prevalence of pregnancy will be similar (50%).  
17 For all aims, we consider the logistic regression with mixed effects. Based on 1.5%-2.5%  
18 incidence of SMM with 20%-50% increase due to the COVID -19 impact or race disparities, we  
19 conduct the power analysis based on the logistic regression using SAS and conclude that  
20 200,000 sample size will be adequate to reach the power around 90%. **Figure 3** illustrates the  
21 relationship of power and odds ratio with setting of n=200,000, significance at 0.05, variable of  
22 interest with a ratio of 10:90. This will be the basic model considered, and it indicates strong  
23 power for the prediction model.  
24  
25  
26  
27  
28  
29

### 30 Current status and anticipated timeline

31  
32 As of April 2022, we have received the linked core databases for the S3C cohort for the period of  
33 January 2018- June 2021 and full datasets will be available by the Fall of 2022. Our team is also  
34 actively constructing N3C analytic data of women with childbirths during January 2018-  
35 December 2021 for statistical analysis and machine learning. Furthermore, our team is  
36 conducting in-depth interviews with our targeted populations according to our protocols  
37 described here. We anticipate completing our main analyses in May 2023.  
38  
39

### 40 Patient and public involvement

1  
2  
3 No patients were involvement in the design, conduct and reporting of our research. We will  
4 actively reach out patients and public in the dissemination of our findings.  
5  
6  
7

## 8 9 **ETHICS AND DISSEMINATION**

10  
11 The study was approved by institutional review boards at the University of South Carolina  
12 (Pro00115169) and the South Carolina Department of Health and Environmental Control  
13 (DHEC IRB.21-030). Informed consent will be completed for the participants to be enrolled in  
14 the in-depth interviews. Furthermore, the NIH's N3C data access committee approved the data  
15 use request for this project (RP-2B9622). Study findings will be disseminated with key  
16 stakeholders including patients, presented at academic conferences, and published in peer-  
17 reviewed journals.  
18  
19  
20  
21  
22  
23  
24  
25  
26  
27

## 28 **DISCUSSION**

29  
30 The COVID-19 pandemic has led to unprecedented societal disruptions to individuals,  
31 communities, healthcare institutions, and society. Empirical data on the scope of possible  
32 widening racial/ethnic disparities in SMMM during the COVID-19 pandemic and how historical  
33 structural racism and discrimination of all types have impacted women of color  
34 disproportionately are sparse. This study will be among the first efforts to investigate whether the  
35 COVID-19 pandemic, structural racism, and racial discrimination— exposures with broad scale  
36 and reach – have contributed to the racial/ethnic disparities in SMMM in the context of the  
37 COVID-19 pandemic. Second, this proposed study employs a state-of-the-art design (i.e., a  
38 convergent parallel design) to comprehensively examine the impacts of structural racism and  
39 discrimination on maternal health and the complex pathways between multilevel determinants.  
40 This design has the advantage of allowing us to weigh both quantitative and qualitative methods  
41 equally and interpret the results together.<sup>62</sup> Third, the proposed study will innovatively use  
42 machine learning models to predict SMMM and chronic morbidities up to one year after  
43  
44  
45  
46  
47  
48  
49  
50  
51  
52  
53  
54  
55  
56  
57  
58  
59  
60



1  
2  
3 delivery in the context of the COVID-19 pandemic. Fourth, we propose a large-scale population-  
4 based cohort study concurrently for both SC and the U.S., which will innovatively integrate  
5 COVID-19-related clinical, surveillance, EHR, and geospatial data at community, healthcare  
6 institutions, and system/policy levels. These newly integrated data sources will allow us to  
7 examine multilevel determinants of maternal health during the pandemic and advance the  
8 investigation on racial/ethnic disparities in long-standing complications post-pandemic. In  
9 brief, this research represents a significant and innovative contribution to the research on the  
10 unacceptable racial/ethnic disparities in SMMM during pregnancy and postpartum in the  
11 context of COVID-19. By focusing on social contextual factors (e.g., structural racism), we seek  
12 to identify ways in which the largest number of women may be impacted by targeted programs  
13 and policies aiming to alter the context in which these morbidities and mortality occur.  
14  
15

16 This study also has some limitations. First, it is possible that the county-level social contexts'  
17 effects in our data may not be significant. If that happens, we will calculate ZIP-code level social  
18 contexts. By assessing racial segregations, spatial distribution of economic disadvantage  
19 communities within a residence county and within-community racial discrimination, this study  
20 will provide evidence on the associations between distinct social contexts and maternal health  
21 disparities. Second, considering some women may move during pregnancy, the stagnant  
22 residential social contexts might not reflect their long-term exposures to neighborhood  
23 structural racism. Furthermore, in the case of inferior F measures ( $<0.7$ ) of learning predictive  
24 models, we will apply feature selection algorithms and association rules in model training to  
25 maximize performance.  
26  
27

28 In conclusion, the rising SMMM rate and persistent racial/ethnic disparities should trigger  
29 public health concerns, not only due to the immediate burden faced by vulnerable women, but  
30 also due to potentially lasting effects on women's health over a life course or along family lines  
31 across generations.<sup>63</sup> This study will investigate racial/ethnic disparities in SMMM, the  
32 contributing roles and mediating pathways of social contexts (e.g., structural racism, racial  
33  
34  
35  
36  
37  
38  
39  
40  
41  
42  
43  
44  
45  
46  
47  
48  
49  
50  
51  
52  
53  
54  
55  
56  
57  
58  
59  
60

1  
2  
3 discrimination), and the long-standing health consequences of the pandemic by studying the  
4 distributions of COVID-19 cases and multilevel determinants of maternal health in a racially,  
5 socioeconomically, and geographically diverse population of U.S. pregnant women. A rigorous  
6 examination of social contexts and racial/ethnic disparities in SMMM during the pandemic will  
7 contribute to the identification of factors with a broad scale and reach for programmatic and  
8 policy interventions to alter the context in which morbidity and mortality occur. Our findings  
9 will inform continuing efforts to reverse the rising trends of SMMM in the U.S.  
10  
11  
12  
13  
14  
15  
16  
17  
18  
19  
20  
21  
22  
23  
24  
25  
26  
27  
28  
29  
30  
31  
32  
33  
34  
35  
36  
37  
38  
39  
40  
41  
42  
43  
44  
45  
46  
47  
48  
49  
50  
51  
52  
53  
54  
55  
56  
57  
58  
59  
60

## List of abbreviations

ACS: American Community Survey

AHA: American Hospital Association

AIM: Alliance for Innovation on Maternal Health program

AUC: Receiver Operating Characteristic Curve

Black: Non-Hispanic Black

BMI: Body Mass Index

CDC: Centers for Disease Control and Prevention

CDM: Clinical Data Model

CNN: Convolutional Neural Network

DBM: Deep Boltzmann Machine

ECMO: Extracorporeal Membrane Oxygenation

EHR: Electronic Health Records

ICU: Intensive Care Unit

ICD-10-CM: the International Classification of Diseases, Tenth Revision, Clinical Modification

IMPROVE: Implementing a Maternal health and PRenancy Outcomes Vision for Everyone

IPV: Intimate Partner Violence

IRB: Institutional Review Board

LOS: Prolonged Length of Stay

LSTM: Long Short-Term Memory

MCPs: Maternal Care Providers

MMM: Maternal Morbidity and Mortality

MUSC: Medical University of South Carolina

MV: Mechanical Ventilation

N3C: National COVID Cohort Collaborative

NCATS: the National Center for Advancing Translational Sciences

1  
2  
3 NIAID: National Institute of Allergy and Infectious Disease  
4  
5 NIH: National Institutes of Health  
6  
7 OMOP: Observational Medical Outcomes Partnership  
8  
9 OR: Odds Ratio  
10  
11 PRAMS: Pregnancy Risk Assessment and Monitoring System  
12  
13 RNN: Recurrent Neural Network  
14  
15 S3C: South Carolina COVID-19 Cohort  
16  
17 S3C-P: South Carolina COVID-19 Cohort-Pregnancy  
18  
19 SC: South Carolina  
20  
21 SC DHEC: SC Department of Health and Environmental Control  
22  
23 SC DMH: South Carolina Department of Mental Health  
24  
25 SC RFA: SC Office of Revenue and Fiscal Affairs  
26  
27  
28 SES: Socioeconomic Status  
29  
30 SMM: Severe Maternal Morbidity  
31  
32 SMMM: Severe Maternal Morbidity and Mortality  
33  
34 SVM: Support Vector Machine  
35  
36 UofSC: University of South Carolina  
37  
38 White: Non-Hispanic White  
39  
40 WHO: World Health Organization  
41  
42  
43  
44  
45  
46  
47  
48  
49  
50  
51  
52  
53  
54  
55  
56  
57  
58  
59  
60

## Declarations

### *Consent for publication*

Not applicable.

### *Data availability statement*

The South Carolina data (S3C) that were analyzed to produce the findings of this study are available from the SC Office of Revenue and Fiscal Affairs (RFA) upon reasonable request. Per our contract with SC RFA, only approved users have access to the data and data cannot be made publicly available by authors. N3C data can be accessed through the NCATS N3C Data Enclave for approved users (<https://covid.cd2h.org>).

### *Contributors*

JL conceptualized and designed the study and wrote the first draft and PH, CL, JZ, SQ and XL participated in writing sections of the original proposal. All authors critically reviewed and edited the manuscript. JL, PH, CL, and BO acquired the data and completed IRB approvals. JL, PH, CL, JZ, BAC, NH, BO, XL participated in quantitative data analysis and data interpretation. JL, SQ, and MT participated in qualitative data collection, data analysis and data interpretation. JL and XL secured the funding.

### *Funding*

Research reported in this publication was supported by the National Institute of Allergy And Infectious Diseases and Office of the Director of the National Institutes of Health under Award Number 3R01AI127203-5S2 for Implementing a Maternal health and PRegnancy Outcomes Vision for Everyone (IMPROVE). Li and Liu are the MPIs for this study. The funder had no role in the design of this study and will not have any role during its execution, analyses, interpretation of the data, or decision to submit results.

### *Competing interests*

The authors declare that they have no completing interests.

### *Acknowledgments*

1  
2  
3 The authors thank SC Department of Health and Environmental Control, SC Revenue and Fiscal  
4 Affairs office, and other SC agencies for contributing the data in South Carolina. The authors  
5 also want to thank the organizations ([https://ncats.nih.gov/n3c/resources/data-](https://ncats.nih.gov/n3c/resources/data-contribution/data-transfer-agreement-signatories)  
6 contribution/data-transfer-agreement-signatories) and scientists who have contributed to the  
7 on-going development of N3C database [<https://doi.org/10.1093/jamia/ocaa196>].  
8  
9  
10  
11  
12  
13  
14  
15  
16  
17  
18  
19  
20  
21  
22  
23  
24  
25  
26  
27  
28  
29  
30  
31  
32  
33  
34  
35  
36  
37  
38  
39  
40  
41  
42  
43  
44  
45  
46  
47  
48  
49  
50  
51  
52  
53  
54  
55  
56  
57  
58  
59  
60

For peer review only

## References

1. Creanga AA, Berg CJ, Ko JY, Farr SL, Tong VT, Bruce FC, et al. Maternal mortality and morbidity in the United States: where are we now? *J Womens Health (Larchmt)*. 2014;23(1):3-9.
2. Centers for Disease Control and Prevention. Infographic: Racial/Ethnic Disparities in Pregnancy-Related Deaths - United States, 2007-2016. <https://www.cdc.gov/reproductivehealth/maternal-mortality/disparities-pregnancy-related-deaths/infographic.html>. Accessed April 5, 2021.
3. Centers for Disease Control and Prevention. Rates in Severe Morbidity Indicators per 10,000 Delivery Hospitalizations, 1993-2014. <https://www.cdc.gov/reproductivehealth/maternalinfanthealth/smm/rates-severe-morbidity-indicator.htm>. Accessed April 5, 2021.
4. Centers for Disease Control and Prevention. Maternal Mortality. <https://www.cdc.gov/reproductivehealth/maternal-mortality/index.html>. Accessed March 27, 2021.
5. Centers for Disease Control and Prevention. Pregnancy Complications. *Reproductive Health* <https://www.cdc.gov/reproductivehealth/maternalinfanthealth/pregnancy-complications.html>. Accessed April 5, 2021.
6. National Public Radio. Nearly dying in childbirth: why preventable complications are growing in the US. 2017; <https://www.npr.org/2017/12/22/572298802/nearly-dying-in-childbirth-why-preventable-complications-are-growing-in-u-s>. Accessed April 5, 2021.
7. Vesco KK, Ferrante S, Chen Y, Rhodes T, Black CM, Allen-Ramey F. Costs of Severe Maternal Morbidity During Pregnancy in US Commercially Insured and Medicaid Populations: An Observational Study. *Matern Child Health J*. 2020;24(1):30-38.
8. Hao J, Hassen D, Hao Q, Graham J, Paglia MJ, Brown J, et al. Maternal and Infant Health Care Costs Related to Preeclampsia. *Obstet Gynecol*. 2019;134(6):1227-1233.

- 1  
2  
3 9. Admon LK, Winkelman TNA, Zivin K, Terplan M, Mhyre JM, Dalton VK. Racial and  
4  
5 Ethnic Disparities in the Incidence of Severe Maternal Morbidity in the United States,  
6  
7 2012-2015. *Obstet Gynecol.* 2018;132(5):1158-1166.  
8
- 9  
10 10. Declercq E, Zephyrin L. Maternal Mortality in the United States: A Primer. *The*  
11  
12 *Commonwealth Fund, Data Brief* 2020;  
13  
14 [https://www.commonwealthfund.org/publications/issue-brief-](https://www.commonwealthfund.org/publications/issue-brief-report/2020/dec/maternal-mortality-united-states-primer)  
15  
16 [report/2020/dec/maternal-mortality-united-states-primer](https://www.commonwealthfund.org/publications/issue-brief-report/2020/dec/maternal-mortality-united-states-primer). Accessed March 27, 2021.  
17
- 18 11. Fingar KR, Hambrick MM, Heslin KC, Moore JE. Trends and Disparities in Delivery  
19  
20 Hospitalizations Involving Severe Maternal Morbidity, 2006-2015: Statistical Brief  
21  
22 #243. *Healthcare Cost and Utilization Project (HCUP) Statistical Briefs*. Rockville  
23  
24 (MD)2018.  
25
- 26 12. Wang E, Glazer KB, Howell EA, Janevic TM. Social Determinants of Pregnancy-Related  
27  
28 Mortality and Morbidity in the United States: A Systematic Review. *Obstet Gynecol.*  
29  
30 2020;135(4):896-915.  
31
- 32 13. Howell EA, Egorova NN, Janevic T, Brodman M, Balbierz A, Zeitlin J, et al. Race and  
33  
34 Ethnicity, Medical Insurance, and Within-Hospital Severe Maternal Morbidity  
35  
36 Disparities. *Obstet Gynecol.* 2020;135(2):285-293.  
37
- 38 14. Chen J, Cox S, Kuklina EV, Ferre C, Barfield W, Li R. Assessment of Incidence and  
39  
40 Factors Associated With Severe Maternal Morbidity After Delivery Discharge Among  
41  
42 Women in the US. *JAMA Netw Open.* 2021;4(2):e2036148.  
43  
44
- 45 15. Gold JAW, Rossen LM, Ahmad FB, Sutton P, Li Z, Salvatore PP, et al. Race, Ethnicity,  
46  
47 and Age Trends in Persons Who Died from COVID-19 - United States, May-August 2020.  
48  
49 *MMWR Morb Mortal Wkly Rep.* 2020;69(42):1517-1521.  
50
- 51 16. Emeruwa UN, Spiegelman J, Ona S, Kahe K, Miller RS, Fuchs KM, et al. Influence of  
52  
53 Race and Ethnicity on Severe Acute Respiratory Syndrome Coronavirus 2 (SARS-CoV-2)  
54  
55  
56  
57  
58  
59  
60



- 1  
2  
3 Infection Rates and Clinical Outcomes in Pregnancy. *Obstet Gynecol.* 2020;136(5):1040-  
4 1043.  
5  
6  
7 17. Grechukhina O, Greenberg V, Lundsberg LS, Deshmukh U, Cate J, Lipkind HS, et al.  
8 Coronavirus disease 2019 pregnancy outcomes in a racially and ethnically diverse  
9 population. *Am J Obstet Gynecol MFM.* 2020;2(4):100246.  
10  
11  
12 18. Ellington S, Strid P, Tong VT, Woodworth K, Galang RR, Zambrano LD, et al.  
13 Characteristics of Women of Reproductive Age with Laboratory-Confirmed SARS-CoV-2  
14 Infection by Pregnancy Status - United States, January 22-June 7, 2020. *MMWR Morb*  
15 *Mortal Wkly Rep.* 2020;69(25):769-775.  
16  
17  
18 19. Zambrano LD, Ellington S, Strid P, Galang RR, Oduyebo T, Tong VT, et al. Update:  
19 Characteristics of Symptomatic Women of Reproductive Age with Laboratory-Confirmed  
20 SARS-CoV-2 Infection by Pregnancy Status - United States, January 22-October 3, 2020.  
21 *MMWR Morb Mortal Wkly Rep.* 2020;69(44):1641-1647.  
22  
23  
24 20. Moore JT, Ricaldi JN, Rose CE, Fuld J, Parise M, Kang GJ, et al. Disparities in Incidence  
25 of COVID-19 Among Underrepresented Racial/Ethnic Groups in Counties Identified as  
26 Hotspots During June 5-18, 2020 - 22 States, February-June 2020. *MMWR Morb*  
27 *Mortal Wkly Rep.* 2020;69(33):1122-1126.  
28  
29  
30 21. National Public Radio. The Impact of Coronavirus on Households in Major U.S. Cities.  
31 2020; <https://media.npr.org/assets/img/2020/09/08/cities-report-090920-final.pdf>.  
32 Accessed April 5, 2021.  
33  
34  
35 22. McCloskey L, Amutah-Onukagha N, Bernstein J, Handler A. Setting the Agenda for  
36 Reproductive and Maternal Health in the Era of COVID-19: Lessons from a Cruel and  
37 Radical Teacher. *Matern Child Health J.* 2021;25(2):181-191.  
38  
39  
40 23. Onwuzurike C, Meadows AR, Nour NM. Examining Inequities Associated With Changes  
41 in Obstetric and Gynecologic Care Delivery During the Coronavirus Disease 2019  
42 (COVID-19) Pandemic. *Obstet Gynecol.* 2020;136(1):37-41.  
43  
44  
45  
46  
47  
48  
49  
50  
51  
52  
53  
54  
55  
56  
57  
58  
59  
60

- 1
- 2
- 3 24. Howell EA. Reducing Disparities in Severe Maternal Morbidity and Mortality. *Clin*
- 4
- 5 *Obstet Gynecol.* 2018;61(2):387-399.
- 6
- 7 25. Westgren M, Pettersson K, Hagberg H, Acharya G. Severe maternal morbidity and
- 8 mortality associated with COVID-19: The risk should not be downplayed. *Acta Obstet*
- 9 *Gynecol Scand.* 2020;99(7):815-816.
- 10
- 11 26. Allen EH, Benatar S. Maternity Care Financing: Challenges and Opportunities
- 12 Highlighted by the COVID-19 Pandemic. Robert Wood Johnson Foundation; The Urban
- 13 Institute; 2020.
- 14
- 15 27. Statista. Rate of coronavirus (COVID-19) cases in the United States as of December 16,
- 16 2021, by state(per 100,000 people).
- 17 [https://www.statista.com/statistics/1109004/coronavirus-covid19-cases-rate-us-](https://www.statista.com/statistics/1109004/coronavirus-covid19-cases-rate-us-americans-by-state/)
- 18 [americans-by-state/](https://www.statista.com/statistics/1109004/coronavirus-covid19-cases-rate-us-americans-by-state/). Accessed December 23, 2021.
- 19
- 20 28. National Center for Health Statistics. Maternal Mortality by State, 2018. 2018;
- 21 <https://www.cdc.gov/nchs/maternal-mortality/MMR-2018-State-Data-508.pdf>.
- 22 Accessed March 27, 2021.
- 23
- 24 29. Kaiser Family Foundation. Number of Births By Race. 2018;
- 25 [https://www.kff.org/other/state-indicator/births-by-](https://www.kff.org/other/state-indicator/births-by-raceethnicity/?dataView=1&currentTimeframe=0&sortModel=%7B%22colId%22:%22Block%22,%22sort%22:%22desc%22%7D)
- 26 [raceethnicity/?dataView=1&currentTimeframe=0&sortModel=%7B%22colId%22:%22Bl](https://www.kff.org/other/state-indicator/births-by-raceethnicity/?dataView=1&currentTimeframe=0&sortModel=%7B%22colId%22:%22Block%22,%22sort%22:%22desc%22%7D)
- 27 [ack%22,%22sort%22:%22desc%22%7D](https://www.kff.org/other/state-indicator/births-by-raceethnicity/?dataView=1&currentTimeframe=0&sortModel=%7B%22colId%22:%22Block%22,%22sort%22:%22desc%22%7D). Accessed March 27, 2021.
- 28
- 29 30. South Carolina State House. South Carolina Maternal Morbidity and Mortality Review
- 30 Committee. Legislative Brief March 2020. 2020;
- 31 <https://www.scstatehouse.gov/reports/DHEC/mmmr-2020-Final.pdf>. Accessed April 2,
- 32 2021.
- 33
- 34 31. South Carolina Department of Health and Environmental Control. Health Professional
- 35 Shortage Area (HPSA). [https://scdhec.gov/health-professionals/health-professional-](https://scdhec.gov/health-professionals/health-professional-shortage-area-hpsa)
- 36 [shortage-area-hpsa](https://scdhec.gov/health-professionals/health-professional-shortage-area-hpsa).
- 37
- 38
- 39
- 40
- 41
- 42
- 43
- 44
- 45
- 46
- 47
- 48
- 49
- 50
- 51
- 52
- 53
- 54
- 55
- 56
- 57
- 58
- 59
- 60

- 1  
2  
3 32. Leonard SA, Main EK, Scott KA, Profit J, Carmichael SL. Racial and ethnic disparities in  
4 severe maternal morbidity prevalence and trends. *Ann Epidemiol*. 2019;33:30-36.  
5  
6  
7 33. Leonard SA, Kennedy CJ, Carmichael SL, Lyell DJ, Main EK. An Expanded Obstetric  
8 Comorbidity Scoring System for Predicting Severe Maternal Morbidity. *Obstet Gynecol*.  
9 2020;136(3):440-449.  
10  
11  
12  
13 34. Haendel MA, Chute CG, Bennett TD, Eichmann DA, Guinney J, Kibbe WA, et al. The  
14 National COVID Cohort Collaborative (N3C): Rationale, design, infrastructure, and  
15 deployment. *J Am Med Inform Assoc*. 2021;28(3):427-443.  
16  
17  
18  
19 35. Olatosi B, Zhang J, Weissman S, Hu J, Haider MR, Li X. Using big data analytics to  
20 improve HIV medical care utilisation in South Carolina: A study protocol. *BMJ Open*.  
21 2019;9(7):e027688.  
22  
23  
24  
25 36. Centers for Disease Control and Prevention. U.S. State and Territorial Gathering Bans:  
26 March 11-December 31, 2020 by County by Day. 2021;  
27 [https://catalog.data.gov/dataset/u-s-state-and-territorial-gathering-bans-march-11-](https://catalog.data.gov/dataset/u-s-state-and-territorial-gathering-bans-march-11-december-31-2020-by-county-by-day-79295)  
28 [december-31-2020-by-county-by-day-79295](https://catalog.data.gov/dataset/u-s-state-and-territorial-gathering-bans-march-11-december-31-2020-by-county-by-day-79295). Accessed April 3, 2021.  
29  
30  
31  
32  
33 37. Shulman HB, D'Angelo DV, Harrison L, Smith RA, Warner L. The Pregnancy Risk  
34 Assessment Monitoring System (PRAMS): Overview of Design and Methodology. *Am J*  
35 *Public Health*. 2018;108(10):1305-1313.  
36  
37  
38  
39 38. Centers for Disease Control and Prevention. How Does CDC Identify Severe Maternal  
40 Mortality? [https://www.cdc.gov/reproductivehealth/maternalinfanthealth/smm/severe-](https://www.cdc.gov/reproductivehealth/maternalinfanthealth/smm/severe-morbidity-ICD.htm)  
41 [morbidity-ICD.htm](https://www.cdc.gov/reproductivehealth/maternalinfanthealth/smm/severe-morbidity-ICD.htm). Accessed April 3, 2021.  
42  
43  
44  
45  
46 39. Chakhtoura N, Chinn JJ, Grantz KL, Eisenberg E, Artis Dickerson S, Lamar C, et al.  
47 Importance of research in reducing maternal morbidity and mortality rates. *Am J Obstet*  
48 *Gynecol*. 2019;221(3):179-182.  
49  
50  
51  
52  
53  
54  
55  
56  
57  
58  
59  
60

- 1  
2  
3 40. Blumenfeld YJ, El-Sayed YY, Lyell DJ, Nelson LM, Butwick AJ. Risk Factors for  
4 Prolonged Postpartum Length of Stay Following Cesarean Delivery. *Am J Perinatol*.  
5 2015;32(9):825-832.  
6  
7  
8  
9 41. Srinivas SK, Small DS, Macheras M, Hsu JY, Caldwell D, Lorch S. Evaluating the impact  
10 of the laborist model of obstetric care on maternal and neonatal outcomes. *Am J Obstet*  
11 *Gynecol*. 2016;215(6):770 e771-770 e779.  
12  
13  
14  
15 42. W. H. O. Working Group on the Clinical Characterisation Management of Covid-  
16 infection. A minimal common outcome measure set for COVID-19 clinical research.  
17 *Lancet Infect Dis*. 2020;20(8):e192-e197.  
18  
19  
20  
21 43. Mehra R, Boyd LM, Ickovics JR. Racial residential segregation and adverse birth  
22 outcomes: A systematic review and meta-analysis. *Soc Sci Med*. 2017;191:237-250.  
23  
24  
25 44. Mehra R, Keene DE, Kershaw TS, Ickovics JR, Warren JL. Racial and ethnic disparities  
26 in adverse birth outcomes: Differences by racial residential segregation. *SSM Popul*  
27 *Health*. 2019;8:100417.  
28  
29  
30  
31 45. United States Census Bureau. Appendix B: Measures of Residential Segregation.  
32 <https://www.census.gov/topics/housing/housing-patterns/guidance/appendix-b.html>.  
33  
34  
35  
36 Accessed April 3, 2021.  
37  
38 46. Massey DS, White MJ, Phua V-C. The Dimensions of Segregation Revisited. *Sociol*  
39 *Methods Res*. 1996;25:172-206.  
40  
41  
42 47. Do DP, Frank R, Finch BK. Does SES explain more of the black/white health gap than we  
43 thought? Revisiting our approach toward understanding racial disparities in health. *Soc*  
44 *Sci Med*. 2012;74(9):1385-1393.  
45  
46  
47  
48 48. Farmer MM, Ferraro KF. Are racial disparities in health conditional on socioeconomic  
49 status? *Soc Sci Med*. 2005;60(1):191-204.  
50  
51  
52  
53  
54  
55  
56  
57  
58  
59  
60

- 1  
2  
3 49. Franks P, Muennig P, Lubetkin E, Jia H. The burden of disease associated with being  
4 African-American in the United States and the contribution of socio-economic status.  
5 *Soc Sci Med.* 2006;62(10):2469-2478.  
6  
7  
8  
9 50. Ritter JA, Taylor LJ. Racial Disparity in Unemployment. *The Review of Economics and*  
10 *Statistics.* 2011;93(1):30-42.  
11  
12  
13 51. Bell CN, Owens-Young JL. Self-Rated Health and Structural Racism Indicated by  
14 County-Level Racial Inequalities in Socioeconomic Status: The Role of Urban-Rural  
15 Classification. *J Urban Health.* 2020;97(1):52-61.  
16  
17  
18  
19 52. American Hospital Association Hospital Statistics. 2019 AHA Annual Survey American  
20 Hospital Association. 2020;  
21  
22 <https://www.ahadata.com/system/files/media/file/2020/10/2019AHAAnnual.pdf>.  
23  
24  
25  
26 53. Hung P, Henning-Smith CE, Casey MM, Kozhimannil KB. Access To Obstetric Services  
27 In Rural Counties Still Declining, With 9 Percent Losing Services, 2004-14. *Health Aff*  
28 *(Millwood).* 2017;36(9):1663-1671.  
29  
30  
31  
32 54. Kozhimannil KB, Hung P, Henning-Smith C, Casey MM, Prasad S. Association Between  
33 Loss of Hospital-Based Obstetric Services and Birth Outcomes in Rural Counties in the  
34 United States. *JAMA.* 2018;319(12):1239-1247.  
35  
36  
37  
38 55. Hung P, Casey MM, Kozhimannil KB, Karaca-Mandic P, Moscovice IS. Rural-urban  
39 differences in access to hospital obstetric and neonatal care: how far is the closest one? *J*  
40 *Perinatol.* 2018;38(6):645-652.  
41  
42  
43  
44 56. Braun V, Clarke V. What can "thematic analysis" offer health and wellbeing researchers?  
45 *Int J Qual Stud Health Well-being.* 2014;9:26152.  
46  
47  
48  
49 57. Chmielewska B, Barratt I, Townsend R, Kalafat E, van der Meulen J, Gurol-Urganci I, et  
50 al. Effects of the COVID-19 pandemic on maternal and perinatal outcomes: a systematic  
51 review and meta-analysis. *Lancet Glob Health.* 2021.  
52  
53  
54  
55  
56  
57  
58  
59  
60

- 1  
2  
3 58. ACOG Committee Opinion No. 736: Optimizing Postpartum Care. *Obstet Gynecol.*  
4  
5 2018;131(5):e140-e150.  
6  
7 59. Goodfellow I, Bengio Y, Courville A, Bengio Y. *Deep learning*. Vol 1. Cambridge: MIT  
8  
9 Press; 2016.  
10  
11 60. SC Department of Health and Environmental Control. SCAN Birth Certificate Data.  
12  
13 [https://apps.dhec.sc.gov/Health/SCAN\\_BDP/tables/birthtable.aspx](https://apps.dhec.sc.gov/Health/SCAN_BDP/tables/birthtable.aspx). Accessed January  
14  
15 26, 2021.  
16  
17 61. Yang X, Zhang J, Chen S, Olatosi B, Bruner L, Diedhiou A, et al. Demographic  
18  
19 Disparities in Clinical Outcomes of COVID-19: Data From a Statewide Cohort in South  
20  
21 Carolina. *Open Forum Infect Dis.* 2021;8(9):ofab428.  
22  
23 62. Creswell JW, Plano Clark VL. *Designing and Conducting Mixed Methods Research*. 2nd  
24  
25 Edition ed. Los Angeles: Sage Publications; 2011.  
26  
27 63. Society for Women's Health Research. The Disproportionate Impact of COVID-19 on  
28  
29 Women of Color. 2020; [https://swhr.org/the-disproportionate-impact-of-covid-19-on-](https://swhr.org/the-disproportionate-impact-of-covid-19-on-women-of-color/)  
30  
31 [women-of-color/](https://swhr.org/the-disproportionate-impact-of-covid-19-on-women-of-color/). Accessed April 3, 2021.  
32  
33  
34  
35  
36  
37  
38  
39  
40  
41  
42  
43  
44  
45  
46  
47  
48  
49  
50  
51  
52  
53  
54  
55  
56  
57  
58  
59  
60

1  
2  
3 **Figure 1. Multilevel conceptual framework to examine racial/ethnic disparities in**  
4 **severe maternal morbidity and mortality in the context of COVID-19 Pandemic**  
5

6 **Figure 2. Using concurrent triangulation mixed methods design to investigate**  
7 **racial/ethnic disparities in severe maternal morbidity and mortality during the**  
8 **COVID-19 pandemic**  
9

10 **Figure 3. Estimated power according to prevalence of outcomes and odds ratios**  
11  
12  
13  
14  
15  
16  
17  
18  
19  
20  
21  
22  
23  
24  
25  
26  
27  
28  
29  
30  
31  
32  
33  
34  
35  
36  
37  
38  
39  
40  
41  
42  
43  
44  
45  
46  
47  
48  
49  
50  
51  
52  
53  
54  
55  
56  
57  
58  
59  
60

For peer review only

1  
2  
3  
4  
5  
6  
7  
8  
9  
10  
11  
12  
13  
14  
15  
16  
17  
18  
19  
20  
21  
22  
23  
24  
25  
26  
27  
28  
29  
30  
31  
32  
33  
34  
35  
36  
37  
38  
39  
40  
41  
42  
43  
44  
45  
46  
47  
48  
49  
50  
51  
52  
53  
54  
55  
56  
57  
58  
59  
60

**Figure 1. Multilevel conceptual framework to examine racial/ethnic disparities in severe maternal morbidity and mortality in the context of COVID-19 pandemic**

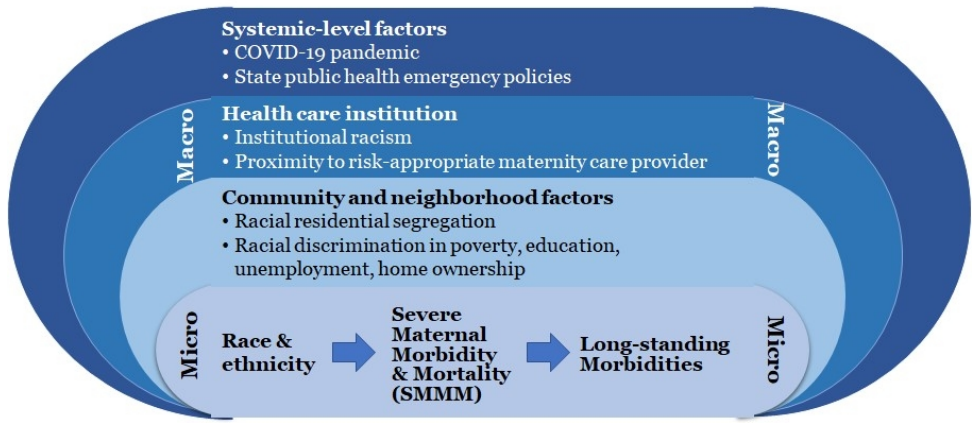

Figure 1

248x202mm (96 x 96 DPI)



**Figure 2. Using concurrent triangulation mixed methods design to investigate racial/ethnic disparities in severe maternal morbidity and mortality during the COVID-19 pandemic**

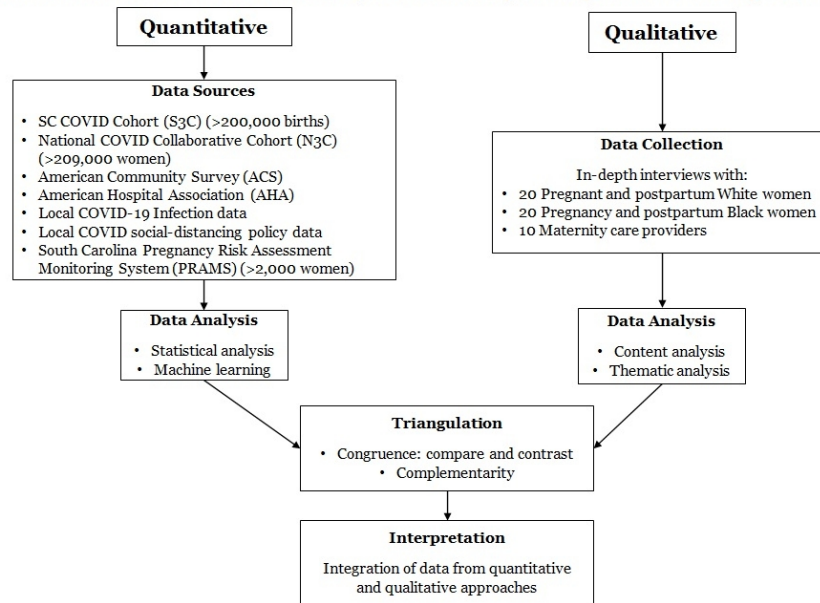

Figure 2

221x146mm (120 x 120 DPI)

1  
2  
3  
4  
5  
6  
7  
8  
9  
10  
11  
12  
13  
14  
15  
16  
17  
18  
19  
20  
21  
22  
23  
24  
25  
26  
27  
28  
29  
30  
31  
32  
33  
34  
35  
36  
37  
38  
39  
40  
41  
42  
43  
44  
45  
46  
47  
48  
49  
50  
51  
52  
53  
54  
55  
56  
57  
58  
59  
60



Figure 3  
195x128mm (120 x 120 DPI)
